# Supplementary material for: Effect of short-term exposure to air pollution on ischemic stroke incidence and mortality: a five-year time-series study in Jining, China
Source: PeerJ journal article supplement (doi:10.7717/peerj.20298), 2025-11-06
Supplement: data.xlsx [file data.xlsx]

## Sheet: data1822
date	holiday	time	year	mouth	doy	dow	death	incidence	temp	PM2.5	PM10	NO2	CO	SO2
2018-01-01	1	1	2018	1	1	Monday	1	127	4.83	161.147	286.324	75	2.07353	48.3824
2018-01-02	0	2	2018	1	2	Tuesday	2	149	5.76	179.842	300.146	79.3595	2.14649	33.8832
2018-01-03	0	3	2018	1	3	Wednesday	1	126	2.98	39.2083	72.7778	39.8889	1.01111	24.2639
2018-01-04	0	4	2018	1	4	Thursday	6	130	-0.85	34.3472	62.9861	40.6957	0.927778	20.9861
2018-01-05	0	5	2018	1	5	Friday	2	100	-3.89	76.1667	99.1437	53.1944	1.22778	24.4167
2018-01-06	0	6	2018	1	6	Saturday	3	104	-3.32	124.639	158.091	68.6944	1.60556	31.8333
2018-01-07	0	7	2018	1	7	Sunday	4	76	-1.06	97.5278	136.292	51.1111	1.36667	26.6389
2018-01-08	0	8	2018	1	8	Monday	6	110	-4.61	77.0694	130.742	38.7488	1.05972	18.6528
2018-01-09	0	9	2018	1	9	Tuesday	3	131	-5.92	30.7917	104.129	40.2222	0.838889	22.7917
2018-01-10	0	10	2018	1	10	Wednesday	8	130	-5.92	33.6944	75.0833	48.1389	0.859722	23.2222
2018-01-11	0	11	2018	1	11	Thursday	2	110	-4.75	31.2917	66.3551	43.8514	0.683333	24.3611
2018-01-12	0	12	2018	1	12	Friday	5	97	-4.7	43.0972	77.4937	45.2083	0.773611	26.3062
2018-01-13	0	13	2018	1	13	Saturday	9	116	-1.2	66.7083	94.3889	50.1111	0.926389	31.5
2018-01-14	0	14	2018	1	14	Sunday	6	120	3.02	83.25	111.778	67.0972	1.38889	30.7917
2018-01-15	0	15	2018	1	15	Monday	4	143	4.62	134.611	192.389	85.6528	2.05694	47.9583
2018-01-16	0	16	2018	1	16	Tuesday	2	140	4.01	214.819	303.889	108.306	2.81111	49.7639
2018-01-17	0	17	2018	1	17	Wednesday	10	110	4.08	180.319	275.931	58.3194	2.05417	18.25
2018-01-18	0	18	2018	1	18	Thursday	7	140	3.44	241.111	351.667	65.6667	2.39583	35.8889
2018-01-19	0	19	2018	1	19	Friday	3	110	4.69	162.778	243.514	45.9861	1.69722	23.8611
2018-01-20	0	20	2018	1	20	Saturday	4	123	4.14	157.968	271.628	64.68	1.94457	29.1407
2018-01-21	0	21	2018	1	21	Sunday	4	99	4.12	192.639	364.153	64.8056	2.46111	24.6389
2018-01-22	0	22	2018	1	22	Monday	5	121	4	83.7083	169.928	42.2361	1.275	16.125
2018-01-23	0	23	2018	1	23	Tuesday	8	115	1.15	50.0139	74.8472	36.2639	0.990278	21.5417
2018-01-24	0	24	2018	1	24	Wednesday	8	119	-0.9	62.2222	92.8243	52.375	1.13472	28.7778
2018-01-25	0	25	2018	1	25	Thursday	5	96	-2.32	42.9903	69.2936	44.3925	0.947343	27.8406
2018-01-26	0	26	2018	1	26	Friday	8	93	-4.5	59.2639	76.1351	38.0972	1.01111	31.0833
2018-01-27	0	27	2018	1	27	Saturday	5	86	-3.91	76.6528	103.333	42.2639	1.06944	38.4722
2018-01-28	0	28	2018	1	28	Sunday	9	72	-4.92	125.25	132.7	39.8333	1.34028	32.25
2018-01-29	0	29	2018	1	29	Monday	4	108	-7.49	139.91	166.143	42.0211	1.52844	30.6624
2018-01-30	0	30	2018	1	30	Tuesday	5	112	-4.79	61.2639	119.854	56.0417	1.32083	41.5833
2018-01-31	0	31	2018	1	31	Wednesday	5	97	-3.31	83.6944	141.556	62.75	1.6375	48.3056
2018-02-01	0	32	2018	2	1	Thursday	10	138	-1.36	73.1111	133.639	57.4183	1.47089	44.6427
2018-02-02	0	33	2018	2	2	Friday	3	110	-0.91	36.7784	98.776	34.4181	0.829589	21.7095
2018-02-03	0	34	2018	2	3	Saturday	3	112	-3.54	39.7464	73.7594	46.5	0.905556	24.2361
2018-02-04	0	35	2018	2	4	Sunday	7	89	-1.4	74.3889	107.165	61.0556	1.30139	39.2639
2018-02-05	0	36	2018	2	5	Monday	5	93	-0.35	81.4194	114.221	58.3186	1.33575	33.9719
2018-02-06	0	37	2018	2	6	Tuesday	6	85	-0.38	47.4583	71.9844	44.7873	1.02379	34.0101
2018-02-07	0	38	2018	2	7	Wednesday	9	92	0.98	50.0097	112.325	38.3611	0.989015	26.3671
2018-02-08	0	39	2018	2	8	Thursday	3	84	0.37	49.3056	97.2684	45.7121	1.06225	29.3512
2018-02-09	0	40	2018	2	9	Friday	7	77	2.98	75.7379	159.082	55.0587	1.45876	47.5797
2018-02-10	0	41	2018	2	10	Saturday	3	82	2.03	42.66	151.181	40.6667	0.808333	28.5577
2018-02-11	0	42	2018	2	11	Sunday	8	89	1.44	63.3472	164.792	42.3889	0.904167	33.125
2018-02-12	0	43	2018	2	12	Monday	9	73	0.26	53.3155	95.3313	41.4444	0.793056	34.3611
2018-02-13	0	44	2018	2	13	Tuesday	11	104	5.37	83.0924	126.208	25.5079	0.749802	20.7917
2018-02-14	0	45	2018	2	14	Wednesday	14	72	9.11	73.6806	141.653	33.375	1.11371	23.9792
2018-02-15	1	46	2018	2	15	Thursday	2	52	6.69	32.4638	59.4851	19.5652	0.591304	26.3478
2018-02-16	1	47	2018	2	16	Friday	1	44	6.46	104.583	147.583	24.9583	0.905556	48.8472
2018-02-17	1	48	2018	2	17	Saturday	8	93	6.59	95.375	136.986	25.3472	1.10833	32.5139
2018-02-18	1	49	2018	2	18	Sunday	5	101	4.71	34.4028	63.2685	17.5417	0.690278	18.0833
2018-02-19	1	50	2018	2	19	Monday	10	124	4.85	36.7222	71.0495	21.625	0.790278	21.4028
2018-02-20	1	51	2018	2	20	Tuesday	8	101	4.96	77.4173	117.626	28.4565	1.21033	20.8847
2018-02-21	1	52	2018	2	21	Wednesday	4	123	4.71	105.361	143.097	28.8056	1.49861	15.1111
2018-02-22	0	53	2018	2	22	Thursday	3	117	6.14	71.4306	128.819	25.9583	1.12917	17.4722
2018-02-23	0	54	2018	2	23	Friday	5	142	8.47	57.5	93.82	26.5833	0.937862	17.5972
2018-02-24	0	55	2018	2	24	Saturday	3	122	9.53	54.7222	118.736	35.2222	1.02639	22.0556
2018-02-25	0	56	2018	2	25	Sunday	6	102	6.58	53.8194	101.361	34.5278	1.02639	20.7917
2018-02-26	0	57	2018	2	26	Monday	6	112	9.34	63.8015	128.612	33.0245	1.05764	18.6353
2018-02-27	0	58	2018	2	27	Tuesday	4	118	11.33	76.0391	154.694	48.5404	1.49924	42.8321
2018-02-28	0	59	2018	2	28	Wednesday	4	110	10.69	95.0625	169.917	29.7917	1.42708	14.125
2018-03-01	0	60	2018	3	1	Thursday	5	124	8.1	35.7778	96.2361	23.4167	0.805556	16.3889
2018-03-02	0	61	2018	3	2	Friday	6	90	6.85	43.3194	93.8333	24.1014	0.981039	24.1806
2018-03-03	0	62	2018	3	3	Saturday	9	108	13.34	60.7591	109.053	26.6027	1.11178	14.9076
2018-03-04	0	63	2018	3	4	Sunday	7	81	15.58	30.4028	66.0441	34.4583	1.23611	12.4722
2018-03-05	0	64	2018	3	5	Monday	3	105	6.83	25.5	60	30.9444	0.794444	17.9028
2018-03-06	0	65	2018	3	6	Tuesday	7	130	5.23	37.3533	84.4034	46.529	0.985085	28.3533
2018-03-07	0	66	2018	3	7	Wednesday	6	112	5.08	29.2624	62.9403	31.7078	0.883601	14.1048
2018-03-08	0	67	2018	3	8	Thursday	7	119	6.08	47.9535	93.5066	35.186	0.989553	16.18
2018-03-09	0	68	2018	3	9	Friday	8	97	5.76	52.785	106.006	41.8798	0.990157	21.5266
2018-03-10	0	69	2018	3	10	Saturday	12	105	9.88	57.5556	134.806	24.5833	0.986111	17.5972
2018-03-11	0	70	2018	3	11	Sunday	6	101	12.65	61.375	143.521	38.9306	1.23646	38.6389
2018-03-12	0	71	2018	3	12	Monday	8	121	15.36	51.2917	132.542	32.8194	1.20694	31.1389
2018-03-13	0	72	2018	3	13	Tuesday	10	91	16.69	35.3611	80.9946	20.6383	0.838043	20.378
2018-03-14	0	73	2018	3	14	Wednesday	9	126	17.37	54.1667	104.306	26.5139	1.11111	28.9583
2018-03-15	0	74	2018	3	15	Thursday	5	120	15.71	46.0707	117.922	23.5227	0.93548	16.5341
2018-03-16	0	75	2018	3	16	Friday	4	110	5.8	17.2222	39.3472	22.2802	0.652114	15.7083
2018-03-17	0	76	2018	3	17	Saturday	1	107	9.61	39.6111	77.4028	33.7222	0.754167	24.5556
2018-03-18	0	77	2018	3	18	Sunday	5	73	10.3	75.4722	113.597	51.5278	1.56944	13.3194
2018-03-19	0	78	2018	3	19	Monday	4	85	7.97	57.3889	102.458	28.7917	1.10417	17.1667
2018-03-20	0	79	2018	3	20	Tuesday	11	102	5	17.8098	56.1389	22.1667	0.693056	16.6111
2018-03-21	0	80	2018	3	21	Wednesday	6	87	6.04	32.0239	72.6941	43.7769	0.961788	22.4422
2018-03-22	0	81	2018	3	22	Thursday	5	87	10.52	48.9199	105.825	43.078	1.04949	22.0556
2018-03-23	0	82	2018	3	23	Friday	6	112	14.18	57.4571	144.676	36.6131	0.990821	20.9432
2018-03-24	0	83	2018	3	24	Saturday	2	94	14.29	34.5072	69.9789	30.2609	0.805797	13.8406
2018-03-25	0	84	2018	3	25	Sunday	4	93	15.99	56.1905	117.762	26.2381	1.08095	25.4286
2018-03-26	0	85	2018	3	26	Monday	8	117	16.45	50.8819	132.882	25.3542	0.966667	20.6042
2018-03-27	0	86	2018	3	27	Tuesday	4	101	17.94	37.9583	87.8472	17.5139	0.784722	19.0556
2018-03-28	0	87	2018	3	28	Wednesday	6	115	19.23	37.2454	83.5757	20.8704	0.86713	20.0951
2018-03-29	0	88	2018	3	29	Thursday	2	86	18.37	68.998	189.98	42.1266	1.18016	28.2639
2018-03-30	0	89	2018	3	30	Friday	4	89	16.89	32.6347	106.625	40.0628	0.807548	29.5429
2018-03-31	0	90	2018	3	31	Saturday	5	91	19.36	59.4432	134.455	31.1504	1.00012	22.7566
2018-04-01	0	91	2018	4	1	Sunday	7	97	21.09	77.75	191.597	29.9444	1.73056	31.2222
2018-04-02	0	92	2018	4	2	Monday	3	78	22.27	57.9357	168.083	21.1559	1.12047	25.9669
2018-04-03	0	93	2018	4	3	Tuesday	7	87	22.53	55.1528	201.153	31.5972	1.19722	33.125
2018-04-04	0	94	2018	4	4	Wednesday	3	68	12.44	23.7597	67.2095	21.8207	0.562742	16.7428
2018-04-05	1	95	2018	4	5	Thursday	3	84	7.09	40.5483	71.4003	29.2748	0.709481	13.5996
2018-04-06	1	96	2018	4	6	Friday	3	98	9.08	32.7222	122.528	24.8889	0.545833	12.7639
2018-04-07	1	97	2018	4	7	Saturday	4	108	7.62	20.4078	76.9861	26.3887	0.524369	17.7639
2018-04-08	0	98	2018	4	8	Sunday	2	83	13.48	44.7361	136.847	28.1806	0.602778	21.9028
2018-04-09	0	99	2018	4	9	Monday	2	134	16.96	48.0516	142.938	29.5119	0.799206	37.3492
2018-04-10	0	100	2018	4	10	Tuesday	7	111	20.37	59.6793	202.223	40.5126	0.966414	26.8737
2018-04-11	0	101	2018	4	11	Wednesday	5	106	20.93	60.5417	200.389	40.4722	0.772222	33.8056
2018-04-12	0	102	2018	4	12	Thursday	4	110	15.93	31.3768	75.7232	25.7491	0.673822	24.1467
2018-04-13	0	103	2018	4	13	Friday	4	71	15.32	22.8125	50.8958	35.6875	0.810417	17.0833
2018-04-14	0	104	2018	4	14	Saturday	6	92	12.64	26.5139	124.139	33.3333	0.701389	15.9028
2018-04-15	0	105	2018	4	15	Sunday	2	82	12.42	39.5463	136.96	52.6528	0.575463	23.0509
2018-04-16	0	106	2018	4	16	Monday	6	90	13.38	49.9611	226.937	38.8294	0.669048	22.6329
2018-04-17	0	107	2018	4	17	Tuesday	8	109	15.9	48.9946	179.708	23.0417	0.645833	26.125
2018-04-18	0	108	2018	4	18	Wednesday	6	115	18.67	52.9192	170.448	23.1326	0.774369	26.2033
2018-04-19	0	109	2018	4	19	Thursday	9	105	20.05	51.4861	134.806	23.2083	0.795833	26.0278
2018-04-20	0	110	2018	4	20	Friday	5	97	21.41	55.9203	128.959	25.061	0.943056	32.0072
2018-04-21	0	111	2018	4	21	Saturday	2	103	22.33	54.5389	126.346	25.7778	0.830833	28.8639
2018-04-22	0	112	2018	4	22	Sunday	6	83	20.86	21.5	41.0895	19.9375	0.735417	11.5208
2018-04-23	0	113	2018	4	23	Monday	6	93	15.74	29	67.7843	17.2353	0.590196	12.1373
2018-04-24	0	114	2018	4	24	Tuesday	2	84	15.91	30.3822	89.6824	24.1389	0.606099	20.2458
2018-04-25	0	115	2018	4	25	Wednesday	6	132	17.08	32.3889	82.0139	43.7361	0.613889	28.4167
2018-04-26	0	116	2018	4	26	Thursday	4	98	19.01	39.2222	100.008	25.41	0.854529	17.2778
2018-04-27	0	117	2018	4	27	Friday	4	105	21.19	48.7778	118.903	38.2083	1.00694	24.0972
2018-04-28	0	118	2018	4	28	Saturday	8	92	21.98	42.625	120.403	23.6528	0.7125	23.9028
2018-04-29	1	119	2018	4	29	Sunday	3	100	22.4	53.2029	121.797	21.6087	0.789855	26.4638
2018-04-30	1	120	2018	4	30	Monday	5	78	23.64	63.5906	132.732	25.1723	1.00167	28.4836
2018-05-01	1	121	2018	5	1	Tuesday	10	93	23.56	60.1389	145.203	23.8333	0.972222	18.375
2018-05-02	0	122	2018	5	2	Wednesday	6	99	19.73	34.2723	88.8613	19.5347	0.582904	16.4336
2018-05-03	0	123	2018	5	3	Thursday	5	101	19.66	43.2911	85.6814	25.9924	0.650642	21.1624
2018-05-04	0	124	2018	5	4	Friday	2	92	20.38	47.846	136.424	22.3865	0.544867	26.2912
2018-05-05	0	125	2018	5	5	Saturday	5	82	21.46	58.1838	63.7778	27.1304	0.618841	18.0725
2018-05-06	0	126	2018	5	6	Sunday	6	66	21.9	42.625	84.3104	29.2222	0.854167	29.8056
2018-05-07	0	127	2018	5	7	Monday	6	98	17.37	41.5882	96.8039	22	0.67451	25.0711
2018-05-08	0	128	2018	5	8	Tuesday	5	104	19.94	52.4841	111.619	43.689	0.804257	28.1905
2018-05-09	0	129	2018	5	9	Wednesday	4	79	18.42	58.4569	116.874	41.1836	0.776398	32.7409
2018-05-10	0	130	2018	5	10	Thursday	4	80	18.6	36.6818	88.0164	21.151	0.536853	30.3346
2018-05-11	0	131	2018	5	11	Friday	5	73	20.96	38.5278	77.9141	22.4016	0.77123	27.2929
2018-05-12	0	132	2018	5	12	Saturday	3	71	21.33	40.5833	89.0761	21.5139	0.719444	18.7222
2018-05-13	0	133	2018	5	13	Sunday	3	87	23.61	34.3556	111.964	16.825	0.736111	16.9417
2018-05-14	0	134	2018	5	14	Monday	4	99	25.4	33.2588	86.1298	15.8261	0.764937	20.1768
2018-05-15	0	135	2018	5	15	Tuesday	5	93	28.21	37.8056	88.5863	14.9598	0.772024	22.4122
2018-05-16	0	136	2018	5	16	Wednesday	7	90	28.17	33.0435	92.4286	22.1739	0.73913	20.2174
2018-05-17	0	137	2018	5	17	Thursday	5	86	27.18	40.82	96.1126	25.0121	0.848977	22.2715
2018-05-18	0	138	2018	5	18	Friday	5	85	25.23	23.0717	77.3438	23.25	0.6	22
2018-05-19	0	139	2018	5	19	Saturday	4	78	20.65	23.6957	74.736	34.0934	0.662626	17.8182
2018-05-20	0	140	2018	5	20	Sunday	4	95	20.28	18.7478	39.5217	19.9059	0.486184	12.2414
2018-05-21	0	141	2018	5	21	Monday	3	87	20.18	25.158	54.9154	27.1423	0.63683	19.718
2018-05-22	0	142	2018	5	22	Tuesday	4	93	19.88	26.625	91.7919	24.5833	0.661111	13.0972
2018-05-23	0	143	2018	5	23	Wednesday	4	94	20.4	49.8958	192.771	21.6042	0.633333	15.6042
2018-05-24	0	144	2018	5	24	Thursday	3	97	20.88	38.5417	107.569	16.6111	0.511111	15.5139
2018-05-25	0	145	2018	5	25	Friday	7	87	23.71	62.2156	145.35	37.5954	1.13844	24.4348
2018-05-26	0	146	2018	5	26	Saturday	3	82	22.2	64.6667	150.458	35.125	1.08333	9.31944
2018-05-27	0	147	2018	5	27	Sunday	3	93	23.4	57.1528	144.583	30.4583	0.9125	9.70833
2018-05-28	0	148	2018	5	28	Monday	7	117	24.69	59.3056	191.444	43.4028	0.897222	15.2639
2018-05-29	0	149	2018	5	29	Tuesday	7	85	25.26	57.3333	167.604	38.5208	0.733333	22.3333
2018-05-30	0	150	2018	5	30	Wednesday	7	119	25.31	49.3092	138.749	49.4262	0.856433	19.4503
2018-05-31	0	151	2018	5	31	Thursday	6	96	23	40.8325	111.972	49.0543	0.723611	20.3182
2018-06-01	0	152	2018	6	1	Friday	7	97	23.56	32.7264	92.369	38.4855	0.68122	21.5942
2018-06-02	0	153	2018	6	2	Saturday	3	104	22.82	36.8472	121.042	25.5278	0.672222	22.9444
2018-06-03	0	154	2018	6	3	Sunday	3	86	23.33	43.3125	118.604	22.75	0.694697	13.8333
2018-06-04	0	155	2018	6	4	Monday	4	115	24.36	56.1947	135.683	25.2518	0.745833	21.1078
2018-06-05	0	156	2018	6	5	Tuesday	10	99	23.48	55.375	162.506	24.4972	0.750794	12.713
2018-06-06	0	157	2018	6	6	Wednesday	9	89	24.37	51.6944	137.681	17.6389	0.665278	8.86111
2018-06-07	0	158	2018	6	7	Thursday	14	99	26.74	42.779	94.3409	21.1035	0.662374	14.2904
2018-06-08	0	159	2018	6	8	Friday	6	87	26.81	59.3207	132.706	33.873	0.870652	17.9328
2018-06-09	0	160	2018	6	9	Saturday	7	60	21.58	41.649	88.1143	25.8384	0.892045	6.03788
2018-06-10	0	161	2018	6	10	Sunday	3	85	21.94	20.0972	41.0227	15.0417	0.698611	5.40278
2018-06-11	0	162	2018	6	11	Monday	6	85	25.01	30.8699	70.2525	33.621	0.917424	12.1402
2018-06-12	0	163	2018	6	12	Tuesday	2	142	27.49	34.6458	101.542	27.1875	0.870833	17.2917
2018-06-13	0	164	2018	6	13	Wednesday	4	116	26.59	24.1667	85.1111	19.8056	0.594444	8.88889
2018-06-14	0	165	2018	6	14	Thursday	3	123	26.55	30.4306	62.373	23.8472	0.663889	12.7917
2018-06-15	0	166	2018	6	15	Friday	4	86	25.87	41.0635	74.6694	27.9994	0.839432	18.2321
2018-06-16	1	167	2018	6	16	Saturday	4	116	25.58	32.6045	62.3624	15.4155	0.556643	10.7723
2018-06-17	1	168	2018	6	17	Sunday	5	98	26.45	36.6111	74.0972	18.1806	0.575	14.6806
2018-06-18	1	169	2018	6	18	Monday	2	90	27.07	35.4861	70.6439	17.1944	0.633333	11
2018-06-19	0	170	2018	6	19	Tuesday	5	94	25.17	43.3727	68.1194	16.2629	0.640994	7.5314
2018-06-20	0	171	2018	6	20	Wednesday	6	118	25.14	39.3056	77.8961	22.6944	0.693056	10.7222
2018-06-21	0	172	2018	6	21	Thursday	6	120	24.72	43.2494	103.697	21.6087	0.638587	12.0682
2018-06-22	0	173	2018	6	22	Friday	4	114	22.96	21.3255	54.9988	20.4366	0.502778	18.1552
2018-06-23	0	174	2018	6	23	Saturday	7	80	23.63	21.2361	51.6944	17.3611	0.543056	12.1944
2018-06-24	0	175	2018	6	24	Sunday	5	74	25.89	28.6008	64.8995	18.3007	0.633696	12.2258
2018-06-25	0	176	2018	6	25	Monday	8	78	29.32	40.5556	125.79	23.6667	0.847222	10.0972
2018-06-26	0	177	2018	6	26	Tuesday	7	80	30.12	17.7964	36.375	17.7019	0.784196	6.17601
2018-06-27	0	178	2018	6	27	Wednesday	6	71	30.35	26.774	51.61	15.0685	0.900264	7.46047
2018-06-28	0	179	2018	6	28	Thursday	6	76	29.58	26.6471	51.65	18.1368	0.826324	9.48824
2018-06-29	0	180	2018	6	29	Friday	3	91	28.9	28	70	20	0.8	44
2018-06-30	0	181	2018	6	30	Saturday	4	82	28.01	40.2986	74.7083	23.2569	0.83125	17.7778
2018-07-01	0	182	2018	7	1	Sunday	4	69	27.87	32.4287	58.555	19.5904	0.744666	14.0429
2018-07-02	0	183	2018	7	2	Monday	6	90	27.37	24.6042	52.6042	26.3958	0.845833	18.6667
2018-07-03	0	184	2018	7	3	Tuesday	2	92	28.52	34.4716	71.1244	29.7723	0.73744	17.305
2018-07-04	0	185	2018	7	4	Wednesday	7	58	29.06	38.6593	80.0637	41.5721	0.801125	14.6438
2018-07-05	0	186	2018	7	5	Thursday	3	82	27.8	41.3611	74.2545	35.1111	0.818056	16.7917
2018-07-06	0	187	2018	7	6	Friday	6	84	26.53	21.942	44.1136	17.6205	0.589946	18.0571
2018-07-07	0	188	2018	7	7	Saturday	2	83	26.11	21.6111	44.5397	17.2778	0.606349	11.9702
2018-07-08	0	189	2018	7	8	Sunday	5	57	28.08	18.1727	35.8981	17.4227	0.569867	9.92029
2018-07-09	0	190	2018	7	9	Monday	5	86	28.87	14	27.4821	20.2778	0.5875	7.72222
2018-07-10	0	191	2018	7	10	Tuesday	7	96	29.86	19.6864	38.3895	30.8428	0.709046	16.0476
2018-07-11	0	192	2018	7	11	Wednesday	3	94	28.76	40.0845	75.9609	29.2802	1.26093	11.9022
2018-07-12	0	193	2018	7	12	Thursday	6	83	28.92	23.5556	54.1659	31.9028	1.27222	11.6673
2018-07-13	0	194	2018	7	13	Friday	3	88	29.92	25.8678	69.7278	20.1612	0.667452	15.9607
2018-07-14	0	195	2018	7	14	Saturday	5	86	30.76	25.1528	52.7187	17.625	0.740278	8.13889
2018-07-15	0	196	2018	7	15	Sunday	6	87	30.08	22.8927	50.4479	17.6364	0.658712	8.9697
2018-07-16	0	197	2018	7	16	Monday	9	79	29.83	37.5332	75.7905	17.8986	1.62524	15.2488
2018-07-17	0	198	2018	7	17	Tuesday	4	77	30.22	30.9034	59.7856	18.0374	0.786836	14.1051
2018-07-18	0	199	2018	7	18	Wednesday	7	97	30.77	28.3611	54.942	19.2639	0.747222	14.5489
2018-07-19	0	200	2018	7	19	Thursday	12	84	31.3	27.8194	58.6775	18.4167	0.740278	17.1944
2018-07-20	0	201	2018	7	20	Friday	4	73	31.87	33.0356	64.2742	18.0996	0.784662	18.087
2018-07-21	0	202	2018	7	21	Saturday	11	100	30.49	40.75	69.4306	17.3889	0.744444	16.4861
2018-07-22	0	203	2018	7	22	Sunday	6	90	30.04	31.8545	57.9179	19.2295	0.678563	16.5839
2018-07-23	0	204	2018	7	23	Monday	11	100	29.44	20.098	51.2181	20.8627	0.6	14.4902
2018-07-24	0	205	2018	7	24	Tuesday	8	96	32.12	20.0278	44.8154	14.0006	0.60485	11.0459
2018-07-25	0	206	2018	7	25	Wednesday	3	85	31.03	28.1938	64.7159	18.8333	0.749802	10.0429
2018-07-26	0	207	2018	7	26	Thursday	12	94	30.66	30.5495	69.0468	25.4252	0.823534	13.3092
2018-07-27	0	208	2018	7	27	Friday	2	93	27.87	23.064	44.8348	25.1896	0.774791	15.939
2018-07-28	0	209	2018	7	28	Saturday	6	71	29.26	21.4306	46.5706	20.9028	0.718056	10.375
2018-07-29	0	210	2018	7	29	Sunday	7	95	29.58	18.2546	35.2027	21.0074	0.694907	14.0185
2018-07-30	0	211	2018	7	30	Monday	2	95	30.15	18.7083	36.2275	20.0411	0.743841	16.4686
2018-07-31	0	212	2018	7	31	Tuesday	5	108	29.93	26.9952	53.9487	30.7101	0.930374	16.8409
2018-08-01	0	213	2018	8	1	Wednesday	10	90	29.81	42.8056	79.2472	31.9921	1.00714	17.9544
2018-08-02	0	214	2018	8	2	Thursday	6	90	29.83	47.1528	80.2395	24.0833	0.955556	19.8889
2018-08-03	0	215	2018	8	3	Friday	3	87	28.65	33.2361	60.5556	22.2917	0.917141	25.4855
2018-08-04	0	216	2018	8	4	Saturday	4	86	28.67	21.1587	42.6619	21.7937	0.674603	11.0635
2018-08-05	0	217	2018	8	5	Sunday	5	81	30.18	29.1333	45.525	17.5524	0.766775	13.8532
2018-08-06	0	218	2018	8	6	Monday	4	84	30.05	42.3	69.0611	20.45	0.911667	18.5667
2018-08-07	0	219	2018	8	7	Tuesday	8	86	31.1	47.4921	79.1887	20.9246	0.93254	15.4286
2018-08-08	0	220	2018	8	8	Wednesday	13	98	31.73	46.5952	77.2183	18.2381	1.02619	10.9048
2018-08-09	0	221	2018	8	9	Thursday	7	91	31.29	62.9833	97.1424	25.2667	1.125	11.4667
2018-08-10	0	222	2018	8	10	Friday	9	90	31.64	68.3333	93.4987	30.3016	1.20476	16.1111
2018-08-11	0	223	2018	8	11	Saturday	6	86	30.62	35.381	56.8929	20.4762	0.778571	17.0238
2018-08-12	0	224	2018	8	12	Sunday	8	80	28.97	32.5714	55.9524	15.7619	0.595238	14.1905
2018-08-13	0	225	2018	8	13	Monday	7	78	28.25	27.3651	44.1809	25.746	0.719048	7.87302
2018-08-14	0	226	2018	8	14	Tuesday	6	64	30.19	18.1111	21.1875	15.4286	0.503175	4.93651
2018-08-15	0	227	2018	8	15	Wednesday	2	95	30.42	15.9468	28.9169	14.5563	0.632222	8.55397
2018-08-16	0	228	2018	8	16	Thursday	1	66	28.53	17.8105	33.9045	17.3605	0.710965	7.94386
2018-08-17	0	229	2018	8	17	Friday	3	55	26.58	29.1628	53.0316	19.6741	0.828558	10.0663
2018-08-18	0	230	2018	8	18	Saturday	3	64	26.95	14.4762	21.6842	16.5238	0.655556	4.44444
2018-08-19	0	231	2018	8	19	Sunday	4	58	27.82	12.9048	20.8889	17.0159	0.679365	5.19048
2018-08-20	0	232	2018	8	20	Monday	7	102	26.81	14.6056	29.7841	16.4659	0.642619	6.23333
2018-08-21	0	233	2018	8	21	Tuesday	3	91	26.99	27.2281	50.0058	27.4035	0.780702	10.8246
2018-08-22	0	234	2018	8	22	Wednesday	2	89	26.31	55.2599	89.0243	24.5362	1.22434	20.8728
2018-08-23	0	235	2018	8	23	Thursday	2	105	25.25	28.3333	59.8486	23.0556	1.00556	18.8148
2018-08-24	0	236	2018	8	24	Friday	5	96	24.98	34	67	25	1	31
2018-08-25	0	237	2018	8	25	Saturday	3	100	24.96	36.8235	69.2953	35.0784	0.958824	12.1765
2018-08-26	0	238	2018	8	26	Sunday	4	95	25.65	28	52	12	0.8	22
2018-08-27	0	239	2018	8	27	Monday	5	104	27.31	21.2941	53.3824	24.5882	0.755882	11
2018-08-28	0	240	2018	8	28	Tuesday	4	79	29.5	22	43	27	0.7	7
2018-08-29	0	241	2018	8	29	Wednesday	8	83	29.35	26.5098	44	25.549	0.878431	6.64706
2018-08-30	0	242	2018	8	30	Thursday	3	79	29.34	27	38	22	0.9	7
2018-08-31	0	243	2018	8	31	Friday	6	75	29.2	31	46	25	1	9
2018-09-01	0	244	2018	9	1	Saturday	4	96	27.66	16	34	25	0.6	7
2018-09-02	0	245	2018	9	2	Sunday	6	79	28.47	24	48	22	0.7	13
2018-09-03	0	246	2018	9	3	Monday	7	107	28.19	30	56	21	0.8	10
2018-09-04	0	247	2018	9	4	Tuesday	8	72	25.87	21.3333	47.8573	31.4722	0.645833	18.4306
2018-09-05	0	248	2018	9	5	Wednesday	7	83	26.38	31.6045	85.9964	49.8056	0.843056	16.4722
2018-09-06	0	249	2018	9	6	Thursday	10	92	23.33	31.2222	63.2742	21.9583	0.684964	10.6274
2018-09-07	0	250	2018	9	7	Friday	6	90	22.56	16.9583	46.8333	27.8548	0.479227	13.9046
2018-09-08	0	251	2018	9	8	Saturday	3	67	21.58	30.1806	70.2319	49.25	0.661111	13.9306
2018-09-09	0	252	2018	9	9	Sunday	3	64	21.82	31.5278	63.3539	46.7083	0.6375	14.8889
2018-09-10	0	253	2018	9	10	Monday	4	97	21.48	22.375	51.0278	33.375	0.591667	17.7222
2018-09-11	0	254	2018	9	11	Tuesday	6	97	22.31	30.2319	62.6377	36.3609	0.689855	22.7971
2018-09-12	0	255	2018	9	12	Wednesday	5	103	24.08	34.6004	66.7738	27.0417	0.633902	22.3277
2018-09-13	0	256	2018	9	13	Thursday	6	97	24.45	30.7246	61.5652	32.8116	0.658152	16.7971
2018-09-14	0	257	2018	9	14	Friday	5	91	25.79	39.4861	59.2439	30.7162	0.759722	11.875
2018-09-15	0	258	2018	9	15	Saturday	1	77	26.02	54.2917	89.1787	43.3333	1.01667	14.1111
2018-09-16	0	259	2018	9	16	Sunday	4	76	24.76	49.0556	61.5089	27.8611	1.06831	10.7639
2018-09-17	0	260	2018	9	17	Monday	3	98	23.61	36.6491	58.2527	32.5088	0.982456	18.8421
2018-09-18	0	261	2018	9	18	Tuesday	8	90	25.83	31.9185	56.3599	37.2083	0.90157	23.2011
2018-09-19	0	262	2018	9	19	Wednesday	4	68	27.67	22.2853	28.2	26.9611	1.17681	7.87228
2018-09-20	0	263	2018	9	20	Thursday	4	72	23.83	35.3299	54.6604	22.9114	1.17401	10.5477
2018-09-21	0	264	2018	9	21	Friday	5	78	22.37	50.1389	88.4583	34.0417	1.36944	14.9861
2018-09-22	1	265	2018	9	22	Saturday	8	58	23.19	32.8472	77.125	34.5694	0.723611	20.4444
2018-09-23	1	266	2018	9	23	Sunday	5	66	23.01	31.2361	81.6667	48.6528	0.673611	26.2222
2018-09-24	1	267	2018	9	24	Monday	3	66	22.36	27.5507	62.1397	39.722	0.750132	22.0659
2018-09-25	0	268	2018	9	25	Tuesday	4	78	20.1	35.4954	67.2464	45.5137	0.967668	18.6821
2018-09-26	0	269	2018	9	26	Wednesday	4	77	19.36	37.3125	65.9375	40.1667	0.870833	16.2083
2018-09-27	0	270	2018	9	27	Thursday	1	62	20.12	42.0229	80.7295	43.5121	0.762077	20.1787
2018-09-28	0	271	2018	9	28	Friday	2	82	21.92	58.0317	93.9635	41.2698	0.974603	13.1587
2018-09-29	0	272	2018	9	29	Saturday	3	62	21.92	50.3333	111.528	51.1111	0.904167	18.1806
2018-09-30	0	273	2018	9	30	Sunday	6	65	20.48	22.75	74.6413	38.6667	0.576389	16.3194
2018-10-01	1	274	2018	10	1	Monday	4	62	18.55	15.7639	54.9167	35.4028	0.475845	16.1377
2018-10-02	1	275	2018	10	2	Tuesday	9	77	20.06	36.2874	85.2053	57.587	0.864493	19.5809
2018-10-03	1	276	2018	10	3	Wednesday	7	88	19.23	40.1399	86.6696	57.3393	0.747321	18.3482
2018-10-04	1	277	2018	10	4	Thursday	3	74	19.03	49.0417	108.292	74.2778	0.969444	21.1806
2018-10-05	1	278	2018	10	5	Friday	6	69	18.5	58.4028	112.069	67.0139	0.995833	23.1806
2018-10-06	1	279	2018	10	6	Saturday	6	74	18.89	68.9444	123	63.3756	1.04396	32.1014
2018-10-07	1	280	2018	10	7	Sunday	3	90	19.7	43.494	115.042	47.378	0.922917	26.9911
2018-10-08	0	281	2018	10	8	Monday	6	94	20.47	41.9722	96.7639	39.4861	0.836111	21.2361
2018-10-09	0	282	2018	10	9	Tuesday	9	93	19.95	46.1111	111.944	28.3333	0.663889	12.9964
2018-10-10	0	283	2018	10	10	Wednesday	6	80	14.55	24.6944	75.2222	42.6806	0.479167	15.3194
2018-10-11	0	284	2018	10	11	Thursday	4	65	14.01	33.975	82.9813	54.8278	0.668056	17.225
2018-10-12	0	285	2018	10	12	Friday	8	70	14.65	50.2778	98.0278	52.8472	0.797222	26.5278
2018-10-13	0	286	2018	10	13	Saturday	6	80	14.97	44.5937	82.3294	33.6381	0.635556	25.1278
2018-10-14	0	287	2018	10	14	Sunday	7	80	16.15	36.5909	72.259	32.8788	0.628788	25.5303
2018-10-15	0	288	2018	10	15	Monday	8	95	15.75	43.125	87.8849	56.7639	0.929167	24.9028
2018-10-16	0	289	2018	10	16	Tuesday	12	100	16.3	60.6232	111.069	50.413	0.912077	18.0386
2018-10-17	0	290	2018	10	17	Wednesday	15	79	17.18	57.803	104.907	41.0044	1.00981	18.8454
2018-10-18	0	291	2018	10	18	Thursday	4	61	15.23	30.1691	62.702	51.638	0.595328	15.337
2018-10-19	0	292	2018	10	19	Friday	6	80	14.09	40.7374	79.6554	63.0732	1.00049	27.1141
2018-10-20	0	293	2018	10	20	Saturday	9	73	15.34	47.0417	100.604	73.2917	0.95	20.2292
2018-10-21	0	294	2018	10	21	Sunday	5	65	16.21	32.187	71.5	53.7241	0.812407	19.237
2018-10-22	0	295	2018	10	22	Monday	11	91	16.55	57.5814	92.2083	42.775	0.700833	12.6639
2018-10-23	0	296	2018	10	23	Tuesday	2	55	17.16	36.9167	89.3889	38.7222	0.547222	14.4306
2018-10-24	0	297	2018	10	24	Wednesday	6	68	18.32	74.6062	143.345	53.1088	0.87335	29.1896
2018-10-25	0	298	2018	10	25	Thursday	10	74	17.09	86.1963	159.73	43.5918	1.04046	22.3056
2018-10-26	0	299	2018	10	26	Friday	5	71	15.54	37.8442	127.018	38.2828	0.61452	18.6202
2018-10-27	0	300	2018	10	27	Saturday	6	58	12.86	29.9472	96.6694	49.1444	0.5575	24.4278
2018-10-28	0	301	2018	10	28	Sunday	6	61	15.6	34.8245	91.5455	52.0896	0.793056	21.7134
2018-10-29	0	302	2018	10	29	Monday	5	70	16.3	41.5362	98.6232	61.6232	0.827536	27.913
2018-10-30	0	303	2018	10	30	Tuesday	5	76	15.76	38.1111	83.9861	56.3333	0.833333	21.8611
2018-10-31	0	304	2018	10	31	Wednesday	5	63	14.74	39.3913	80.087	56.1739	0.75942	24.0145
2018-11-01	0	305	2018	11	1	Thursday	5	63	13.37	56.5139	107.486	59.7222	0.941667	28.6944
2018-11-02	0	306	2018	11	2	Friday	8	60	13.29	64.9531	110.542	50.4362	0.869932	27.1994
2018-11-03	0	307	2018	11	3	Saturday	3	67	15.78	47.9161	86.2732	35.7446	0.753261	21.5952
2018-11-04	0	308	2018	11	4	Sunday	7	68	17.54	46.9722	92.4661	47.0741	0.822222	19.3796
2018-11-05	0	309	2018	11	5	Monday	2	56	16.72	46.0127	80.9513	31.2361	0.768056	12.1806
2018-11-06	0	310	2018	11	6	Tuesday	6	65	12.41	24.3636	30.5174	22.5303	0.615152	6.68182
2018-11-07	0	311	2018	11	7	Wednesday	8	62	8.8	32.8116	49.5477	35.9565	0.802899	15.6377
2018-11-08	0	312	2018	11	8	Thursday	2	63	8.8	34.4179	43.5474	26.6483	0.709058	7.72705
2018-11-09	0	313	2018	11	9	Friday	8	76	10.58	34.3188	53.6272	21.8939	0.872464	12.087
2018-11-10	0	314	2018	11	10	Saturday	6	99	12.09	44.1649	91.0266	44.9161	1.02162	14.2615
2018-11-11	0	315	2018	11	11	Sunday	5	67	12.89	62.375	105.944	49.5278	1.26389	12.5139
2018-11-12	0	316	2018	11	12	Monday	6	69	11.74	78.6223	139.131	61.1894	1.6624	18.8191
2018-11-13	0	317	2018	11	13	Tuesday	12	50	11.88	72.3478	138.064	56.6087	1.63913	14.3043
2018-11-14	0	318	2018	11	14	Wednesday	10	75	12.58	49.1806	99.8098	46.0568	0.995455	22.8804
2018-11-15	0	319	2018	11	15	Thursday	4	57	12.28	47.8472	89.9722	43.3351	0.94636	17.9499
2018-11-16	0	320	2018	11	16	Friday	12	60	11.35	27.3333	64.7884	26.3611	0.818659	10.0737
2018-11-17	0	321	2018	11	17	Saturday	2	56	8.82	31.0308	65.0637	40.2252	0.681039	13.2283
2018-11-18	0	322	2018	11	18	Sunday	4	71	7.37	52.8678	100.665	43.8538	1.04595	13.93
2018-11-19	0	323	2018	11	19	Monday	4	55	7.67	58.4375	107.458	37.9375	1.25	11.0417
2018-11-20	0	324	2018	11	20	Tuesday	6	61	10.44	57.8958	108.5	38.2708	1.11458	9.6875
2018-11-21	0	325	2018	11	21	Wednesday	6	68	10.39	76.0417	145.167	47.5833	1.18125	12.75
2018-11-22	0	326	2018	11	22	Thursday	6	46	8.72	52.9545	111.792	45.9118	0.941107	15.3788
2018-11-23	0	327	2018	11	23	Friday	9	68	9.43	61.2292	128.708	47.6875	1.01875	15.4583
2018-11-24	0	328	2018	11	24	Saturday	12	67	9.99	84.2639	168.167	62.5694	1.31389	17.8333
2018-11-25	0	329	2018	11	25	Sunday	2	70	12	109.567	205.442	60.1587	1.45813	28.8155
2018-11-26	0	330	2018	11	26	Monday	8	63	12.12	105.486	199.056	43.1667	1.40833	16.9167
2018-11-27	0	331	2018	11	27	Tuesday	9	55	12.45	124.894	293.62	65.2575	1.68317	21.2933
2018-11-28	0	332	2018	11	28	Wednesday	13	65	12.87	133.257	411.148	65.5073	1.79507	16.652
2018-11-29	0	333	2018	11	29	Thursday	3	74	11.94	140.847	402.986	69.9583	2.10278	21.2917
2018-11-30	0	334	2018	11	30	Friday	5	63	10.93	98.0278	287.875	55.2604	1.50779	17.2114
2018-12-01	0	335	2018	12	1	Saturday	3	64	11.87	90.096	227.569	62.5272	1.2006	16.506
2018-12-02	0	336	2018	12	2	Sunday	5	68	12.47	62.3194	108.682	42.1667	1.20694	9.80556
2018-12-03	0	337	2018	12	3	Monday	4	72	12.34	87.5936	180.73	47.1715	2.17289	7.64976
2018-12-04	0	338	2018	12	4	Tuesday	5	59	7.75	46.087	216.856	37.443	0.756725	13.2639
2018-12-05	0	339	2018	12	5	Wednesday	5	72	7.1	31.7163	94.1032	36.0516	0.603373	9.12302
2018-12-06	0	340	2018	12	6	Thursday	5	79	4.94	42.8241	88.3333	27.2778	0.627778	6.84722
2018-12-07	0	341	2018	12	7	Friday	2	48	1.12	23.0223	50.4312	25.3181	0.496593	13.7816
2018-12-08	0	342	2018	12	8	Saturday	7	58	-0.73	28.7947	60.8116	35.776	0.563466	15.0978
2018-12-09	0	343	2018	12	9	Sunday	10	48	-0.31	47.7681	92.058	51.1304	0.886957	22.2029
2018-12-10	0	344	2018	12	10	Monday	11	71	1.43	82.7222	142.306	72.3056	1.24444	27.8194
2018-12-11	0	345	2018	12	11	Tuesday	9	75	0.73	81.1468	129.204	46.4425	1.09266	18.0476
2018-12-12	0	346	2018	12	12	Wednesday	8	82	-1.29	64.7738	103.841	51.8968	0.978175	22.3611
2018-12-13	0	347	2018	12	13	Thursday	10	62	0.06	92.6061	150.723	64.5625	1.26496	21.9886
2018-12-14	0	348	2018	12	14	Friday	10	61	0.19	67.9861	118.069	57.343	1.18889	26.6528
2018-12-15	0	349	2018	12	15	Saturday	7	63	2.28	48.7361	85.9167	49.9722	0.965278	24.7361
2018-12-16	0	350	2018	12	16	Sunday	10	56	3.53	121.191	200.724	62.8865	1.65326	14.3581
2018-12-17	0	351	2018	12	17	Monday	7	71	5.55	130.72	234.702	70.8611	1.88056	22.5556
2018-12-18	0	352	2018	12	18	Tuesday	5	62	8.53	79.7361	154.843	55.2162	1.21975	21.6385
2018-12-19	0	353	2018	12	19	Wednesday	13	70	9.24	127.097	236	77.1944	1.85556	25.1389
2018-12-20	0	354	2018	12	20	Thursday	9	85	10.01	100.644	188.907	61.873	1.64762	18.1778
2018-12-21	0	355	2018	12	21	Friday	4	68	9.58	100.656	200.156	58	1.925	18.1875
2018-12-22	0	356	2018	12	22	Saturday	11	85	8.9	156	305	81	2.4	2.4
2018-12-23	0	357	2018	12	23	Sunday	7	81	5.53	49	128	45	1	25
2018-12-24	0	358	2018	12	24	Monday	10	65	4.4	50	127	53	1.1	28
2018-12-25	0	359	2018	12	25	Tuesday	10	81	6.27	83	172	58	1.4	24
2018-12-26	0	360	2018	12	26	Wednesday	5	73	5.33	49	107	49	1	16
2018-12-27	0	361	2018	12	27	Thursday	6	62	2.74	30	65	33	0.6	11
2018-12-28	0	362	2018	12	28	Friday	11	76	-2.94	23.0046	66.3478	25.1416	0.457115	14.5165
2018-12-29	0	363	2018	12	29	Saturday	9	52	-3.52	34.2361	67	42.5051	0.691919	25.4684
2018-12-30	1	364	2018	12	30	Sunday	14	85	-3.1	56.8157	87.9843	52.1604	0.941793	26.0631
2018-12-31	1	365	2018	12	31	Monday	11	69	-2.66	81.2778	119.431	57.9348	1.13889	35.9722
2019-01-01	1	366	2019	1	1	Tuesday	13	176	-1.67	107.33	143.671	70.3087	1.36553	38.8049
2019-01-02	0	367	2019	1	2	Wednesday	17	159	-0.74	148.995	198.162	81.5024	1.62585	36.9034
2019-01-03	0	368	2019	1	3	Thursday	10	139	0.82	151.063	207.881	60.447	1.71136	44.5391
2019-01-04	0	369	2019	1	4	Friday	13	100	1.73	150.188	223.238	58.0762	1.88929	23.2758
2019-01-05	0	370	2019	1	5	Saturday	14	124	1.35	85.8837	141.464	72.0122	1.60994	26.2145
2019-01-06	0	371	2019	1	6	Sunday	7	95	0.31	95.4674	158.116	54.8812	1.61153	23.5836
2019-01-07	0	372	2019	1	7	Monday	13	122	1.78	160.428	269.679	73.7826	1.91987	23.7361
2019-01-08	0	373	2019	1	8	Tuesday	18	167	2.3	129.848	226.678	69.8763	1.73018	23.9179
2019-01-09	0	374	2019	1	9	Wednesday	10	151	0.48	35.5151	80.0042	43.5272	0.85157	17.6492
2019-01-10	0	375	2019	1	10	Thursday	16	142	1.11	74.1944	103.97	42.4269	1.03569	9.45833
2019-01-11	0	376	2019	1	11	Friday	15	122	1.9	79.1042	103.083	31.7083	1.03125	9.0625
2019-01-12	0	377	2019	1	12	Saturday	18	137	1.95	125.818	190.206	35.697	1.48598	11.5777
2019-01-13	0	378	2019	1	13	Sunday	6	100	3.1	123.83	228.946	42.0783	1.50101	6.53788
2019-01-14	0	379	2019	1	14	Monday	13	128	2.32	162.092	304.913	70.6382	2.11088	12.5507
2019-01-15	0	380	2019	1	15	Tuesday	11	124	0.98	76.3808	193.744	33.6404	0.945674	9.85644
2019-01-16	0	381	2019	1	16	Wednesday	14	137	-0.64	30.5682	84.6427	46.4747	0.670455	17.2525
2019-01-17	0	382	2019	1	17	Thursday	17	127	2.11	71.4246	137.506	57.6528	1.0127	20.1905
2019-01-18	0	383	2019	1	18	Friday	6	119	3.49	95.9611	169.653	69.45	1.55194	32.7833
2019-01-19	0	384	2019	1	19	Saturday	15	108	4.49	100.583	177.069	69.625	1.55	27.6944
2019-01-20	0	385	2019	1	20	Sunday	17	100	1.51	49.125	94.4609	47.8472	1.05417	19.7778
2019-01-21	0	386	2019	1	21	Monday	13	120	1.85	68.9722	126.819	59.6389	1.19167	39
2019-01-22	0	387	2019	1	22	Tuesday	12	126	3.27	66.9825	134.145	62.7083	1.24034	25.7965
2019-01-23	0	388	2019	1	23	Wednesday	12	132	5.55	79.4366	135.097	76.8253	1.54517	30.5685
2019-01-24	0	389	2019	1	24	Thursday	12	99	5.23	110.312	171.104	72.7083	1.48958	39.8333
2019-01-25	0	390	2019	1	25	Friday	10	120	4.21	79.3611	152.433	56.875	1.15556	24.3889
2019-01-26	0	391	2019	1	26	Saturday	19	107	-0.29	40.6133	83.898	44.3648	0.935307	18.03
2019-01-27	0	392	2019	1	27	Sunday	16	82	3.08	50.7222	90.4535	40.3333	0.856944	18.9861
2019-01-28	0	393	2019	1	28	Monday	20	138	5.08	64.9792	129.45	60.9792	1.14292	23.7583
2019-01-29	0	394	2019	1	29	Tuesday	15	99	4.37	86.9174	169.582	53.8389	1.35987	28.8889
2019-01-30	0	395	2019	1	30	Wednesday	12	107	5.05	69.9649	133.231	46.9701	1.52374	24.0626
2019-01-31	0	396	2019	1	31	Thursday	15	88	1.54	25.3958	72.6667	18.4583	0.704167	14.1667
2019-02-01	0	397	2019	2	1	Friday	18	94	1.15	58.8636	106.887	18.9101	0.97904	9.79949
2019-02-02	0	398	2019	2	2	Saturday	14	95	4.75	75.4444	114.083	25.6944	1.44028	14.1528
2019-02-03	0	399	2019	2	3	Sunday	14	78	5.3	88.3623	168.435	34.087	1.54493	15.942
2019-02-04	1	400	2019	2	4	Monday	13	58	3.82	107.444	212.514	23.8611	1.36806	17.8542
2019-02-05	1	401	2019	2	5	Tuesday	6	75	5.4	141.972	228	17.9583	1.39583	27.5833
2019-02-06	1	402	2019	2	6	Wednesday	17	128	9	146.986	230.528	22.9306	1.51806	13.7361
2019-02-07	1	403	2019	2	7	Thursday	12	118	3.44	44.1667	82.029	8.93308	0.731818	10.5821
2019-02-08	1	404	2019	2	8	Friday	10	71	-0.58	44.9275	65.9565	15.2464	0.843478	15.2754
2019-02-09	1	405	2019	2	9	Saturday	9	97	-1.27	57.322	84.4623	18.6597	1.03675	14.0659
2019-02-10	1	406	2019	2	10	Sunday	12	106	-1.23	62.8557	88.6649	19.1369	1.05424	12.9884
2019-02-11	0	407	2019	2	11	Monday	14	109	-0.59	70.4122	98.4197	15.4187	1.0256	8.44344
2019-02-12	0	408	2019	2	12	Tuesday	16	141	0.23	65.3542	106.285	31.7204	1.1625	17.5417
2019-02-13	0	409	2019	2	13	Wednesday	16	136	3.3	112.986	175.711	40.9457	1.57146	20.0379
2019-02-14	0	410	2019	2	14	Thursday	10	128	3.58	66.5846	94.1497	30.6953	1.15399	7.29452
2019-02-15	0	411	2019	2	15	Friday	14	122	4.15	82.3452	132.406	24.1255	1.2472	9.06187
2019-02-16	0	412	2019	2	16	Saturday	15	120	1.71	68.4464	104.026	26.8307	1.02071	16.9996
2019-02-17	0	413	2019	2	17	Sunday	3	106	1.88	31.8538	55.5403	39.4458	0.799272	15.7083
2019-02-18	0	414	2019	2	18	Monday	5	118	0.91	53.3393	92.0046	46.2321	1.05357	30.2827
2019-02-19	0	415	2019	2	19	Tuesday	7	116	2.63	83.136	128.742	34.8567	1.11382	17.4035
2019-02-20	0	416	2019	2	20	Wednesday	17	140	2.9	124	180	44	1.3	18
2019-02-21	0	417	2019	2	21	Thursday	8	120	3.22	140.457	239.739	60.834	2.07826	15.4565
2019-02-22	0	418	2019	2	22	Friday	13	115	3.19	122.787	199.955	68.9503	1.71756	26.0147
2019-02-23	0	419	2019	2	23	Saturday	9	121	3.52	95.0694	154.715	73.213	1.51528	30.7037
2019-02-24	0	420	2019	2	24	Sunday	15	112	5.3	113.619	198.601	85.1338	1.78548	27.3068
2019-02-25	0	421	2019	2	25	Monday	13	111	7.19	111.918	205.978	87.4414	1.79855	28.3249
2019-02-26	0	422	2019	2	26	Tuesday	12	112	4.9	59.0839	126.759	42.0713	1.30815	26.6075
2019-02-27	0	423	2019	2	27	Wednesday	10	117	4.7	40.0749	77.184	35.3761	0.931461	13.9554
2019-02-28	0	424	2019	2	28	Thursday	5	132	5.55	59.087	113.463	38.3194	1.04985	14.7036
2019-03-01	0	425	2019	3	1	Friday	10	123	6.15	88.6889	164.567	55.6472	1.40444	19.8806
2019-03-02	0	426	2019	3	2	Saturday	10	120	6.23	81.9137	179.349	59.0328	1.2626	19.7084
2019-03-03	0	427	2019	3	3	Sunday	17	106	6.08	54.8333	116.944	25.4861	0.944444	10.125
2019-03-04	0	428	2019	3	4	Monday	15	108	7.47	55.0791	109.685	26.0404	0.953199	12.1801
2019-03-05	0	429	2019	3	5	Tuesday	10	124	8.21	69.2766	137.035	43.3539	1.2863	25.178
2019-03-06	0	430	2019	3	6	Wednesday	12	142	9.33	40.5628	130.822	39.8369	0.806277	13.6854
2019-03-07	0	431	2019	3	7	Thursday	14	104	5.88	27.5553	82.833	41.8735	0.735985	15.375
2019-03-08	0	432	2019	3	8	Friday	12	108	6.12	37.1578	83.503	42.6407	0.884179	21.8285
2019-03-09	0	433	2019	3	9	Saturday	18	116	9.24	43.2428	94.3973	36.4082	0.91558	20.0127
2019-03-10	0	434	2019	3	10	Sunday	9	99	10.57	75.5337	172.463	68.0844	1.3029	24.5942
2019-03-11	0	435	2019	3	11	Monday	15	128	10.76	49.3361	141.261	39.8611	0.958611	13.0083
2019-03-12	0	436	2019	3	12	Tuesday	9	131	10.45	22.4236	81.1155	33.1669	0.644423	12.5818
2019-03-13	0	437	2019	3	13	Wednesday	9	112	9.66	24.0947	87.108	49.0777	0.804924	23.2595
2019-03-14	0	438	2019	3	14	Thursday	9	122	12.5	35.377	100.589	36.3591	0.803744	17.9568
2019-03-15	0	439	2019	3	15	Friday	10	122	12.55	27.6079	84.1431	44.6111	0.596472	18.1229
2019-03-16	0	440	2019	3	16	Saturday	10	110	13.76	41.8359	90.1003	37.0952	0.722619	15.4306
2019-03-17	0	441	2019	3	17	Sunday	9	93	12.53	59.5751	121.236	47.3056	0.891667	25.5278
2019-03-18	0	442	2019	3	18	Monday	16	115	13.42	69.7189	113.115	25.8398	0.77482	22.9437
2019-03-19	0	443	2019	3	19	Tuesday	9	98	15.12	71.0833	88.0136	15.6469	0.718511	13.417
2019-03-20	0	444	2019	3	20	Wednesday	13	123	18.62	102	134	16	0.9	33
2019-03-21	0	445	2019	3	21	Thursday	10	90	12.42	38.0255	87.5754	21.8903	0.489717	11.3341
2019-03-22	0	446	2019	3	22	Friday	6	92	8.98	34.8895	58.311	29.0634	0.579167	20.9692
2019-03-23	0	447	2019	3	23	Saturday	8	109	9.64	38.3018	63.2389	29.5606	0.446465	12.0884
2019-03-24	0	448	2019	3	24	Sunday	10	90	10.32	63.1151	88.6095	40.5595	0.565278	22.1071
2019-03-25	0	449	2019	3	25	Monday	8	115	12.99	75.0139	96.2702	24.2917	0.643056	14.8333
2019-03-26	0	450	2019	3	26	Tuesday	9	97	13.8	57.9028	91.6528	20.0694	0.601389	13.3472
2019-03-27	0	451	2019	3	27	Wednesday	15	102	16.08	65.625	112.625	28.3194	0.720833	16.5
2019-03-28	0	452	2019	3	28	Thursday	12	106	14.86	69.2609	136.146	35.1693	0.945323	22.1772
2019-03-29	0	453	2019	3	29	Friday	6	98	14.41	78.3139	116.653	40.9861	0.931944	18.5972
2019-03-30	0	454	2019	3	30	Saturday	11	87	12.36	35.7197	115.019	25.5694	0.525	9.625
2019-03-31	0	455	2019	3	31	Sunday	5	94	11.05	29.7721	92.3394	47.0556	0.566667	15.5556
2019-04-01	0	456	2019	4	1	Monday	14	113	12.53	56.8125	111.104	40.4167	0.6875	21.625
2019-04-02	0	457	2019	4	2	Tuesday	10	112	12.99	78.3025	112.451	44.9444	0.813889	19.125
2019-04-03	0	458	2019	4	3	Wednesday	7	108	13.91	84.8647	126.196	43.6099	0.920894	25.9016
2019-04-04	0	459	2019	4	4	Thursday	12	90	14.86	87.8611	117.072	25.5091	0.789432	17.6063
2019-04-05	1	460	2019	4	5	Friday	8	86	16.34	97.0417	119.722	23.1667	0.820833	19.5833
2019-04-06	1	461	2019	4	6	Saturday	13	109	18.86	75.1944	136.889	25.875	0.798611	21.9306
2019-04-07	1	462	2019	4	7	Sunday	8	124	20.87	99.5556	180.456	42.125	1.07917	29
2019-04-08	0	463	2019	4	8	Monday	13	127	22.95	81.7083	126.278	39.4028	0.904167	20.2083
2019-04-09	0	464	2019	4	9	Tuesday	10	96	15.34	20.0472	35.8028	20.4028	0.433333	7.375
2019-04-10	0	465	2019	4	10	Wednesday	9	119	10.6	54.8496	61	24.5534	0.625634	15.5
2019-04-11	0	466	2019	4	11	Thursday	9	111	13.04	85.6192	99.7059	38.905	0.788889	11.133
2019-04-12	0	467	2019	4	12	Friday	14	98	14.36	117.036	137.013	55.6201	0.990605	16.072
2019-04-13	0	468	2019	4	13	Saturday	16	90	17.04	76.9623	91.45	22.6448	0.745238	14.8135
2019-04-14	0	469	2019	4	14	Sunday	4	89	16.76	41.51	73.7275	29.7346	0.612629	13.842
2019-04-15	0	470	2019	4	15	Monday	10	126	14.37	49.4899	81.1515	33.1136	0.628409	15.5581
2019-04-16	0	471	2019	4	16	Tuesday	11	120	17.67	67.6944	84.7451	27.8472	0.810507	22.5
2019-04-17	0	472	2019	4	17	Wednesday	8	97	20.05	58.0417	100.639	22.0051	0.916727	21.9016
2019-04-18	0	473	2019	4	18	Thursday	16	86	22.33	43.5278	117.681	20.2089	0.720833	15.9408
2019-04-19	0	474	2019	4	19	Friday	18	77	20.75	52.6074	155.539	45.2556	0.883161	21.3209
2019-04-20	0	475	2019	4	20	Saturday	11	89	19.96	59.0428	108.029	45.5079	1.01318	23.2194
2019-04-21	0	476	2019	4	21	Sunday	10	94	20.47	111.056	153.389	61.2639	1.45694	32.4861
2019-04-22	0	477	2019	4	22	Monday	9	100	19.95	48.9306	70.1037	29.25	1.03194	17.8056
2019-04-23	0	478	2019	4	23	Tuesday	13	108	21.9	50.1667	68.9404	24.0139	0.886111	11.3333
2019-04-24	0	479	2019	4	24	Wednesday	11	122	22.93	49.9082	75.3329	25.9598	0.994071	15.7254
2019-04-25	0	480	2019	4	25	Thursday	7	83	20.83	26.1612	54.3416	17.5783	0.638647	10.3194
2019-04-26	0	481	2019	4	26	Friday	8	87	13.98	38.7222	63.654	32.4861	0.641667	11.5417
2019-04-27	0	482	2019	4	27	Saturday	7	77	15.65	43.8472	69.9	38.2083	0.777778	18.9444
2019-04-28	0	483	2019	4	28	Sunday	9	89	15.45	42.3194	39	27.0556	0.629167	7.625
2019-04-29	0	484	2019	4	29	Monday	6	93	14.86	73.9861	65	24.375	0.781944	12.0278
2019-04-30	0	485	2019	4	30	Tuesday	15	71	17.19	46.7639	116.919	28.7222	0.852778	16.4722
2019-05-01	1	486	2019	5	1	Wednesday	10	115	18.45	20.8472	70.9583	41.2222	0.6125	27.6944
2019-05-02	0	487	2019	5	2	Thursday	16	119	18.65	44.5616	85.1008	47.4318	0.72197	25.4704
2019-05-03	0	488	2019	5	3	Friday	11	104	19.26	42.4861	80.7639	26.9722	0.669444	25.1806
2019-05-04	0	489	2019	5	4	Saturday	8	106	21.82	67.1528	98.9861	50.3194	1.05598	33.375
2019-05-05	0	490	2019	5	5	Sunday	11	93	22.32	62.1389	152.595	55.3194	0.943056	21.2361
2019-05-06	0	491	2019	5	6	Monday	13	110	17.26	24.375	81.7252	28.588	0.461111	12.1147
2019-05-07	0	492	2019	5	7	Tuesday	17	111	15.36	49.375	99.3194	48.5278	0.655556	22.5833
2019-05-08	0	493	2019	5	8	Wednesday	9	104	18.23	46.5972	86.375	28.0972	0.609662	19.9861
2019-05-09	0	494	2019	5	9	Thursday	12	100	20.59	53.5694	86.0417	41.3194	0.718056	19.0556
2019-05-10	0	495	2019	5	10	Friday	17	119	23.03	53.6087	94.8581	29.9368	0.831884	25.3478
2019-05-11	0	496	2019	5	11	Saturday	8	108	24.66	44.2361	75.7758	26.3889	0.827778	17.8611
2019-05-12	0	497	2019	5	12	Sunday	7	98	23.83	44.8333	98.3738	27.436	0.893056	20.5556
2019-05-13	0	498	2019	5	13	Monday	8	116	22.97	50.6944	154.462	25.5556	0.706944	13.4028
2019-05-14	0	499	2019	5	14	Tuesday	16	129	21.62	68.2778	184.619	27.5694	0.95785	27.7772
2019-05-15	0	500	2019	5	15	Wednesday	7	108	21.33	65.4167	90.2841	18.6944	0.961111	20.7778
2019-05-16	0	501	2019	5	16	Thursday	12	124	23.69	48.2639	72.2379	20.8889	0.858333	19.6111
2019-05-17	0	502	2019	5	17	Friday	12	114	25.03	25.4167	52.3472	17.4167	0.709722	15.4722
2019-05-18	0	503	2019	5	18	Saturday	10	116	23.4	20.1528	36.1479	13.1389	0.638889	9.70833
2019-05-19	0	504	2019	5	19	Sunday	12	94	23.97	27.0694	94.1944	20.125	0.609722	15.1389
2019-05-20	0	505	2019	5	20	Monday	4	129	21.85	21.8514	89.5417	20.7639	0.4125	10.8333
2019-05-21	0	506	2019	5	21	Tuesday	11	122	23.22	45.125	88.7778	29.9722	0.686111	21.8194
2019-05-22	0	507	2019	5	22	Wednesday	14	115	24.08	44.7729	101.49	30.3056	0.766667	21.1667
2019-05-23	0	508	2019	5	23	Thursday	8	109	26.47	38.401	90.1396	21.7542	0.69064	16.7766
2019-05-24	0	509	2019	5	24	Friday	14	111	27.33	41	79.7222	19.0139	0.634601	17.875
2019-05-25	0	510	2019	5	25	Saturday	16	138	25.15	49.4576	88.3194	20.7917	0.993056	25.7917
2019-05-26	0	511	2019	5	26	Sunday	9	112	24.99	43.8889	60.45	14.7639	0.972222	14.9167
2019-05-27	0	512	2019	5	27	Monday	5	92	24.84	13.7361	41.5278	17.6806	0.588889	10.0972
2019-05-28	0	513	2019	5	28	Tuesday	13	126	21.1	22.0417	50.968	36.2917	0.605556	21.2083
2019-05-29	0	514	2019	5	29	Wednesday	11	110	21.75	19.1421	43.8119	17.5296	0.570833	13.7808
2019-05-30	0	515	2019	5	30	Thursday	12	83	21.17	32.4444	50.3454	18.9583	0.672222	18.6944
2019-05-31	0	516	2019	5	31	Friday	10	118	23.24	52.9167	74.3833	29.8167	0.94	27.65
2019-06-01	0	517	2019	6	1	Saturday	5	116	23.9	30.9817	68.2298	17.0667	0.703016	18.6206
2019-06-02	0	518	2019	6	2	Sunday	7	118	26.56	37.7018	76.1228	14.3684	0.777193	14.2982
2019-06-03	0	519	2019	6	3	Monday	9	124	27.8	39	79.0833	15.0167	0.76	14.6833
2019-06-04	0	520	2019	6	4	Tuesday	8	129	29.64	37.5926	79.6525	19.2778	0.761438	22.1667
2019-06-05	0	521	2019	6	5	Wednesday	12	93	29.6	51.2882	93.375	23.2982	1.08671	28.3592
2019-06-06	0	522	2019	6	6	Thursday	12	90	26.15	26.4537	41.5331	15.0056	0.740476	9.12904
2019-06-07	1	523	2019	6	7	Friday	10	124	25.64	23.7023	46.7488	15.7494	0.833454	17.6407
2019-06-08	1	524	2019	6	8	Saturday	13	120	27.21	35.5417	69.6944	14.6667	0.913889	15.4167
2019-06-09	1	525	2019	6	9	Sunday	15	138	29.19	28.6376	70.9722	15.4583	0.756566	13.5556
2019-06-10	0	526	2019	6	10	Monday	12	97	26.58	21.7083	49.0833	25.6667	0.704798	20.9306
2019-06-11	0	527	2019	6	11	Tuesday	10	117	25.4	29.0562	68.9432	22.2672	0.751938	17.8619
2019-06-12	0	528	2019	6	12	Wednesday	9	127	26.33	38.0833	85.0278	19.1528	0.816667	20.2917
2019-06-13	0	529	2019	6	13	Thursday	14	144	24.71	37.3213	73.8472	18.0277	0.794071	25.0139
2019-06-14	0	530	2019	6	14	Friday	7	101	25.1	35.5833	70.7874	18.7205	0.675	18.811
2019-06-15	0	531	2019	6	15	Saturday	11	137	28.15	35.7278	81.0139	24.1278	0.676111	19.3556
2019-06-16	0	532	2019	6	16	Sunday	10	96	27.79	41.375	89.25	20.9798	0.873611	30.4015
2019-06-17	0	533	2019	6	17	Monday	9	106	25.31	51.0833	84.1069	17.3552	0.947661	21.6929
2019-06-18	0	534	2019	6	18	Tuesday	18	145	25.71	28.3264	54.044	15.2379	0.598333	16.0986
2019-06-19	0	535	2019	6	19	Wednesday	10	137	27.44	33.8234	55.7698	12.7108	0.740692	14.3162
2019-06-20	0	536	2019	6	20	Thursday	10	161	24.99	34.0469	56.4425	13.6739	0.687228	13.7554
2019-06-21	0	537	2019	6	21	Friday	3	108	24.74	48.4861	78.9015	22.9419	0.754469	15.1685
2019-06-22	0	538	2019	6	22	Saturday	8	104	24.55	32.625	65.6111	21.4167	0.580556	19.4861
2019-06-23	0	539	2019	6	23	Sunday	6	124	24.77	32.4664	74.9401	32.9642	0.708406	30.1827
2019-06-24	0	540	2019	6	24	Monday	9	127	25.12	33.7917	66.8889	18.3889	0.723611	25.0278
2019-06-25	0	541	2019	6	25	Tuesday	8	115	25.82	41.3768	63.2464	15.4707	0.589855	22.6377
2019-06-26	0	542	2019	6	26	Wednesday	6	115	26.8	31.4635	55.9788	15.3312	0.483699	16.087
2019-06-27	0	543	2019	6	27	Thursday	4	117	27.58	33.3696	58.6739	14.4438	0.610507	19.4336
2019-06-28	0	544	2019	6	28	Friday	4	111	28.18	39.3307	56.905	21.1457	0.635444	15.5519
2019-06-29	0	545	2019	6	29	Saturday	8	111	26.06	39.8194	57.6944	13.75	0.765278	10.1667
2019-06-30	0	546	2019	6	30	Sunday	6	135	28.41	23.9924	58.6528	20.9583	0.566667	15.3889
2019-07-01	0	547	2019	7	1	Monday	12	148	29.58	20.125	53.0278	28.9028	0.541667	18.5694
2019-07-02	0	548	2019	7	2	Tuesday	10	127	28.87	31.5914	60.2705	18.7456	0.58845	16.924
2019-07-03	0	549	2019	7	3	Wednesday	13	130	27.69	46.3194	72.1806	20.7639	0.772222	18.5278
2019-07-04	0	550	2019	7	4	Thursday	3	116	25.81	41.4306	72.7222	18.6111	0.675	18.3182
2019-07-05	0	551	2019	7	5	Friday	13	111	27.65	42.1806	67.0833	14.7639	0.70622	15.0205
2019-07-06	0	552	2019	7	6	Saturday	8	122	29.36	25.1528	49.2639	14.7917	0.623611	12.9583
2019-07-07	0	553	2019	7	7	Sunday	12	99	27.06	21.0694	38.8092	18.5278	0.641667	13.9167
2019-07-08	0	554	2019	7	8	Monday	8	130	26.77	21.4167	52.8194	22.7639	0.486171	11.7639
2019-07-09	0	555	2019	7	9	Tuesday	8	136	24.59	33.3478	57.4493	24.2899	0.627536	26.0725
2019-07-10	0	556	2019	7	10	Wednesday	8	136	26.05	30.9414	47.2899	16.5652	0.684722	10.3213
2019-07-11	0	557	2019	7	11	Thursday	9	109	27.23	46.9118	68.8146	29.4928	0.807548	11.0725
2019-07-12	0	558	2019	7	12	Friday	4	137	24.51	41.5417	67.0556	27.0417	0.809722	14.1944
2019-07-13	0	559	2019	7	13	Saturday	2	123	25.3	33.5093	58.4491	25.1806	0.743981	11.5093
2019-07-14	0	560	2019	7	14	Sunday	9	119	27.51	27.3339	56.0815	22.7675	0.699275	10.7826
2019-07-15	0	561	2019	7	15	Monday	5	141	28.4	35.7778	63.4167	16	0.826389	12.7639
2019-07-16	0	562	2019	7	16	Tuesday	10	118	28.9	54.4194	78.875	17.8333	1.0125	13.2361
2019-07-17	0	563	2019	7	17	Wednesday	6	110	28.12	48.8339	82.5483	16.7482	0.790882	17.9855
2019-07-18	0	564	2019	7	18	Thursday	5	129	29.42	19.6818	43.3939	18.4632	0.650289	11.7807
2019-07-19	0	565	2019	7	19	Friday	18	143	30.3	15.3056	36.1528	24.0501	0.558998	12.6008
2019-07-20	0	566	2019	7	20	Saturday	13	128	30.91	25.4306	44.0556	17.5833	0.756944	12.25
2019-07-21	0	567	2019	7	21	Sunday	14	125	32.5	44.9306	83	25.1667	0.898611	10.1944
2019-07-22	0	568	2019	7	22	Monday	15	121	33.07	40.1389	69.5139	20.0417	0.905556	12.0833
2019-07-23	0	569	2019	7	23	Tuesday	10	137	33.35	29.4583	51.9179	16.4149	0.890399	10.2929
2019-07-24	0	570	2019	7	24	Wednesday	12	123	32.86	26.3252	56.702	14.4306	0.842301	8.02652
2019-07-25	0	571	2019	7	25	Thursday	9	117	32.99	24.3333	47.003	14.4263	0.743418	10.9982
2019-07-26	0	572	2019	7	26	Friday	4	116	32.7	29.5972	53.2222	13.3194	0.793056	11.8213
2019-07-27	0	573	2019	7	27	Saturday	13	139	32.87	24.1769	44.218	10.9863	0.714895	10.2955
2019-07-28	0	574	2019	7	28	Sunday	12	109	34.27	15.8333	31.6835	10.0208	0.670833	9.88194
2019-07-29	0	575	2019	7	29	Monday	8	115	34.26	25.4583	50.5	11.9167	0.768056	10.1389
2019-07-30	0	576	2019	7	30	Tuesday	8	128	32.76	10.9583	20.2917	10.5417	0.579167	8.5625
2019-07-31	0	577	2019	7	31	Wednesday	9	117	32.21	14.5417	30.7608	9.61111	0.55	10.5833
2019-08-01	0	578	2019	8	1	Thursday	10	122	31.2	15.968	38.5072	27.5223	0.630918	12.6679
2019-08-02	0	579	2019	8	2	Friday	7	117	30.53	13.5972	27.2941	28.3338	0.611556	10.1166
2019-08-03	0	580	2019	8	3	Saturday	6	149	31.05	24.9874	46.1742	17.1742	0.663131	11.4356
2019-08-04	0	581	2019	8	4	Sunday	10	133	30.48	21.5857	38.6153	13.6564	0.534964	9.9843
2019-08-05	0	582	2019	8	5	Monday	9	129	29.43	15.6515	34.197	15.0455	0.563636	10.4394
2019-08-06	0	583	2019	8	6	Tuesday	8	127	31.76	16.9327	32.3752	21.5236	0.632997	10.3081
2019-08-07	0	584	2019	8	7	Wednesday	5	129	30.69	10.3768	20.9746	18.3478	0.607246	8.78261
2019-08-08	0	585	2019	8	8	Thursday	10	153	31.23	27.6722	45.7417	23.2034	0.79699	10.5924
2019-08-09	0	586	2019	8	9	Friday	11	144	31.76	24.7727	46.0455	16.3557	0.71197	10.097
2019-08-10	0	587	2019	8	10	Saturday	5	139	27.72	12.6667	27.473	16.1884	0.56087	11.0725
2019-08-11	0	588	2019	8	11	Sunday	5	95	27.46	3.72421	9.85714	8.77778	0.469444	10.2917
2019-08-12	0	589	2019	8	12	Monday	10	96	28.03	4.02108	11.8162	7.49078	0.453162	9.6581
2019-08-13	0	590	2019	8	13	Tuesday	6	140	29.84	8.5625	20.2188	8.5	0.56875	9.09375
2019-08-14	0	591	2019	8	14	Wednesday	7	129	29.77	17.1484	34.2857	19.619	0.849206	17.2698
2019-08-15	0	592	2019	8	15	Thursday	7	128	29.53	22.7778	47.9807	21.305	0.722162	15.5199
2019-08-16	0	593	2019	8	16	Friday	10	160	31.26	34.575	63.3139	17.1942	0.760169	12.1977
2019-08-17	0	594	2019	8	17	Saturday	11	131	30.45	18.3333	45.4583	28.4306	0.654167	17.0139
2019-08-18	0	595	2019	8	18	Sunday	12	104	30.29	23.712	66.7215	48.8626	0.780263	12.8443
2019-08-19	0	596	2019	8	19	Monday	9	133	28.97	32.5	62.4444	26.3472	0.775	15.5556
2019-08-20	0	597	2019	8	20	Tuesday	13	157	29.47	21.0471	45.5616	18.5679	0.678261	17.0018
2019-08-21	0	598	2019	8	21	Wednesday	7	134	30.36	34.3926	56.8012	31.1094	0.807352	10.33
2019-08-22	0	599	2019	8	22	Thursday	9	107	29.12	43	80	13	1	33
2019-08-23	0	600	2019	8	23	Friday	9	133	29.94	40	77	14	0.9	32
2019-08-24	0	601	2019	8	24	Saturday	4	117	29.87	48	84	15	1	32
2019-08-25	0	602	2019	8	25	Sunday	5	116	30.3	38	75	18	1.1	28
2019-08-26	0	603	2019	8	26	Monday	10	115	30.97	24.25	52.0694	23.7778	0.729167	9.01389
2019-08-27	0	604	2019	8	27	Tuesday	11	149	29.55	52.2083	83.25	40.5694	1.36667	13.9444
2019-08-28	0	605	2019	8	28	Wednesday	9	121	28.01	51.6528	99.375	29.8472	1.19861	9.70833
2019-08-29	0	606	2019	8	29	Thursday	10	90	28.26	13.2222	53.0972	36.1806	0.566667	12.625
2019-08-30	0	607	2019	8	30	Friday	4	124	25.32	24	63	43	0.6	21
2019-08-31	0	608	2019	8	31	Saturday	5	114	25.46	32.058	64.8261	34.7391	0.710145	17.2754
2019-09-01	0	609	2019	9	1	Sunday	14	132	24.31	29	57	19	0.6	12
2019-09-02	0	610	2019	9	2	Monday	6	122	23.14	37.8907	64.6914	32.1932	0.790675	11.3447
2019-09-03	0	611	2019	9	3	Tuesday	5	106	23.59	30	56	25	0.8	9
2019-09-04	0	612	2019	9	4	Wednesday	12	153	25.06	30.1111	54.8413	24.6508	0.822222	10.9365
2019-09-05	0	613	2019	9	5	Thursday	12	92	25.79	39.2222	74.8333	39.3629	0.92663	12.5236
2019-09-06	0	614	2019	9	6	Friday	12	108	26.39	54.0236	92.9771	45.8364	1.02222	13.8243
2019-09-07	0	615	2019	9	7	Saturday	14	78	26.42	66.3889	108.542	41.3889	1.18889	19.4861
2019-09-08	0	616	2019	9	8	Sunday	10	96	27.55	61.1667	97.375	43.9792	1.15417	11.8333
2019-09-09	0	617	2019	9	9	Monday	15	90	27.26	67.125	107.321	42.7618	1.17538	14.3163
2019-09-10	0	618	2019	9	10	Tuesday	4	86	28.12	56.2184	99.2923	39.3321	1.11995	18.7639
2019-09-11	0	619	2019	9	11	Wednesday	9	101	28.62	21.1304	59.8261	39.5362	0.933333	15.087
2019-09-12	0	620	2019	9	12	Thursday	6	111	30.16	21.7579	49.1451	43.2634	0.823628	10.5416
2019-09-13	1	621	2019	9	13	Friday	9	79	30.68	34.5139	58.6389	22.7379	0.992935	13.048
2019-09-14	1	622	2019	9	14	Saturday	12	115	27.47	18.8696	39.2609	21.4493	0.927536	12.7536
2019-09-15	1	623	2019	9	15	Sunday	9	89	26.54	25.1528	45	40.1111	0.861111	11.875
2019-09-16	0	624	2019	9	16	Monday	12	102	24.08	24.9493	44.4348	29.4168	0.670224	13.1464
2019-09-17	0	625	2019	9	17	Tuesday	19	139	24.13	49.6111	96.4683	41.7258	1.17227	17.8318
2019-09-18	0	626	2019	9	18	Wednesday	10	98	25.24	39.2749	80.347	32.7424	0.901667	13.8333
2019-09-19	0	627	2019	9	19	Thursday	10	177	22.37	25.6645	68.9841	58.5123	0.704545	16.4589
2019-09-20	0	628	2019	9	20	Friday	5	126	22.4	41.6021	78.1898	54.212	0.853962	22.2255
2019-09-21	0	629	2019	9	21	Saturday	14	91	22.68	60	82	46	0.9	21
2019-09-22	0	630	2019	9	22	Sunday	14	105	22.85	36	66	30	0.7	12
2019-09-23	0	631	2019	9	23	Monday	9	105	21.87	26.0166	57.0417	41.8056	0.723611	10.7361
2019-09-24	0	632	2019	9	24	Tuesday	11	106	24.56	46.4773	90.75	46.6136	0.943182	14.4091
2019-09-25	0	633	2019	9	25	Wednesday	5	106	24.45	54.8606	95.6424	52.8091	1.02409	13.7652
2019-09-26	0	634	2019	9	26	Thursday	12	102	22.93	39.0895	76.1147	26.6154	0.858874	19.7266
2019-09-27	0	635	2019	9	27	Friday	8	121	22.86	32.7319	62.552	20.9719	0.645455	10.0349
2019-09-28	0	636	2019	9	28	Saturday	12	97	23.83	41.35	69.2667	17.5167	0.64	8.2
2019-09-29	0	637	2019	9	29	Sunday	11	97	24.43	44.5758	78.4697	18.0152	0.737879	8.93939
2019-09-30	0	638	2019	9	30	Monday	13	104	25.42	41.4928	71.5652	15.5072	0.694203	11.7246
2019-10-01	1	639	2019	10	1	Tuesday	13	114	25.59	35.3333	59.8889	16.9306	0.570833	11.9861
2019-10-02	1	640	2019	10	2	Wednesday	8	82	25.57	40	69	9	0.7	21
2019-10-03	1	641	2019	10	3	Thursday	14	85	26.63	45	80	12	0.9	40
2019-10-04	1	642	2019	10	4	Friday	13	84	26.58	56.873	97.1429	48.7286	0.921888	13.5937
2019-10-05	1	643	2019	10	5	Saturday	18	107	18.25	10.5833	25.0417	21.5278	0.398611	6.44444
2019-10-06	1	644	2019	10	6	Sunday	10	91	18.18	25.5694	33.625	39.375	0.555556	9.45833
2019-10-07	1	645	2019	10	7	Monday	6	84	16.51	43.2639	34.5888	29.2083	0.479167	6.09722
2019-10-08	0	646	2019	10	8	Tuesday	13	101	17.75	58.8889	82.5417	54.0139	1.08889	11.2778
2019-10-09	0	647	2019	10	9	Wednesday	14	89	19.75	68.4242	98.9394	47.0909	1.1	18.9091
2019-10-10	0	648	2019	10	10	Thursday	14	81	21.5	29.4193	41.5088	31.8281	0.884386	7.39737
2019-10-11	0	649	2019	10	11	Friday	10	117	20.45	31.3226	56.001	42.5166	1.04064	10.6189
2019-10-12	0	650	2019	10	12	Saturday	10	94	20.41	33.9336	52.9855	43.6389	1.08194	9.40278
2019-10-13	0	651	2019	10	13	Sunday	12	101	20.06	36.375	76.3333	49.4167	0.972222	15.0972
2019-10-14	0	652	2019	10	14	Monday	9	97	18.54	19.2083	46.8611	30.6751	0.4875	7.23611
2019-10-15	0	653	2019	10	15	Tuesday	8	108	15.39	19.93	42.3001	44.6944	0.419444	11.1389
2019-10-16	0	654	2019	10	16	Wednesday	14	98	14.15	59.9306	84.9167	74.3611	0.856944	20.9861
2019-10-17	0	655	2019	10	17	Thursday	21	85	15.93	72.3877	74.8116	56.4583	0.74529	16.4167
2019-10-18	0	656	2019	10	18	Friday	9	92	16.69	109.465	113.353	62.2222	1.02681	11.8025
2019-10-19	0	657	2019	10	19	Saturday	13	92	18.01	98.3031	114.795	48.8599	1.02277	16.9287
2019-10-20	0	658	2019	10	20	Sunday	18	105	20.33	68.0556	103.167	42.3611	1.09444	14.9722
2019-10-21	0	659	2019	10	21	Monday	9	100	21.08	79.5	117.958	70.5139	1.24028	17
2019-10-22	0	660	2019	10	22	Tuesday	8	115	18.67	71.9444	112.639	49.25	1.08611	27.3611
2019-10-23	0	661	2019	10	23	Wednesday	14	105	19.2	64.9444	105.528	53.3424	1.18768	10.8261
2019-10-24	0	662	2019	10	24	Thursday	8	73	19.33	79.0833	131.069	51.9167	1.19306	15.1806
2019-10-25	0	663	2019	10	25	Friday	7	70	17.13	14.8919	53.3694	25.9255	0.334541	7.17721
2019-10-26	0	664	2019	10	26	Saturday	15	90	14.33	31.4583	64.2083	48.5833	0.4125	14.5
2019-10-27	0	665	2019	10	27	Sunday	4	84	16.06	64.0139	83.2222	40.6528	0.5375	16.4583
2019-10-28	0	666	2019	10	28	Monday	4	75	15.39	77.2204	259.611	45.0821	0.613285	14.2107
2019-10-29	0	667	2019	10	29	Tuesday	6	102	15.88	55.8194	231	53.3889	0.559722	13.7222
2019-10-30	0	668	2019	10	30	Wednesday	11	83	18.05	89.1091	258.792	54.8194	0.720833	27.1806
2019-10-31	0	669	2019	10	31	Thursday	11	125	19.9	111.043	186.444	75.2464	1.06111	24.221
2019-11-01	0	670	2019	11	1	Friday	8	111	19.26	119.403	193.125	75.4412	1.32929	22.3209
2019-11-02	0	671	2019	11	2	Saturday	8	123	18.12	62.2917	125.736	26.4583	0.965278	21.625
2019-11-03	0	672	2019	11	3	Sunday	14	164	18.45	84.6111	113.5	40.8333	1.04167	15.4306
2019-11-04	0	673	2019	11	4	Monday	19	83	15.92	33.7754	63.5682	46.7868	0.791244	11.032
2019-11-05	0	674	2019	11	5	Tuesday	13	142	15.09	75.3768	90.8406	69.1449	1.13333	15.0435
2019-11-06	0	675	2019	11	6	Wednesday	2	105	15.4	98.1667	111.292	59.25	1.25833	18.7222
2019-11-07	0	676	2019	11	7	Thursday	17	110	15.86	122.138	139.389	65.9124	1.34825	15.6528
2019-11-08	0	677	2019	11	8	Friday	14	86	14.21	72.4722	103.819	45.4481	0.977415	13.2452
2019-11-09	0	678	2019	11	9	Saturday	13	71	14.37	122.188	144.913	39.6087	1.04928	15.4928
2019-11-10	0	679	2019	11	10	Sunday	17	72	16.19	47.0139	107.889	35.2917	0.708333	11.125
2019-11-11	0	680	2019	11	11	Monday	12	109	16.6	49.5556	134.792	64.9583	0.869444	17.8194
2019-11-12	0	681	2019	11	12	Tuesday	13	94	18.27	98.8194	165.931	67.0205	1.07554	32.651
2019-11-13	0	682	2019	11	13	Wednesday	12	76	15.16	49.5556	140.236	40.4583	0.576812	11.5442
2019-11-14	0	683	2019	11	14	Thursday	18	77	12.33	37.7983	127.042	35.8551	0.47808	17.9028
2019-11-15	0	684	2019	11	15	Friday	10	120	15.84	64.6808	94.4577	50.0918	0.698628	22.1939
2019-11-16	0	685	2019	11	16	Saturday	10	89	18.36	157.792	186.431	81.5556	1.42917	24.0417
2019-11-17	0	686	2019	11	17	Sunday	10	74	14.89	106.903	129.694	47.8907	1.11359	11.9221
2019-11-18	0	687	2019	11	18	Monday	20	89	7.14	35.6528	218.139	28.3333	0.361111	8.90278
2019-11-19	0	688	2019	11	19	Tuesday	19	105	6.17	64.125	189.597	45.0054	0.571558	18.7337
2019-11-20	0	689	2019	11	20	Wednesday	16	108	9.04	67.3056	134.347	50.7778	0.825	26.5278
2019-11-21	0	690	2019	11	21	Thursday	12	86	11.19	51.6389	92.0643	36.4167	0.638889	18.9722
2019-11-22	0	691	2019	11	22	Friday	8	79	14.32	54.0972	74.3889	35.1999	0.684843	20.9118
2019-11-23	0	692	2019	11	23	Saturday	11	80	16.38	63.3611	84.1455	38.7778	0.881944	17.625
2019-11-24	0	693	2019	11	24	Sunday	11	88	12.78	80.4861	117.931	41.4306	1.01111	9.94444
2019-11-25	0	694	2019	11	25	Monday	9	101	4.46	17.2899	41.6957	28.2754	0.362319	8.37681
2019-11-26	0	695	2019	11	26	Tuesday	10	78	5.8	58.0278	79.1944	47.2222	0.731944	26.6528
2019-11-27	0	696	2019	11	27	Wednesday	13	177	4.09	69.5972	94.7374	45.125	0.773611	15.5417
2019-11-28	0	697	2019	11	28	Thursday	11	160	3.58	26.1111	48.4179	38.3949	0.482065	12.2941
2019-11-29	0	698	2019	11	29	Friday	11	111	4.6	59.2778	81.1667	54.1111	0.743056	21.8508
2019-11-30	0	699	2019	11	30	Saturday	14	75	6.54	81.9787	97.3702	60.1756	0.954018	19.9797
2019-12-01	0	700	2019	12	1	Sunday	22	89	4.86	71.6861	71.3472	46.9028	0.843056	13.5139
2019-12-02	0	701	2019	12	2	Monday	31	95	3.04	51.0784	77.6632	54.7148	0.801209	16.5195
2019-12-03	0	702	2019	12	3	Tuesday	10	96	5.66	62.5889	91.6304	60.8261	0.843478	19.0217
2019-12-04	0	703	2019	12	4	Wednesday	13	101	5.47	76.8478	104.239	68.8043	1.01522	27.587
2019-12-05	0	704	2019	12	5	Thursday	12	105	4.89	86.6171	113.83	64.1703	0.989432	24.4197
2019-12-06	0	705	2019	12	6	Friday	10	91	4.59	61.5616	82.6045	45.3647	0.668357	14.5362
2019-12-07	0	706	2019	12	7	Saturday	11	94	4.62	104.046	114.847	55.8611	1.10417	19.2361
2019-12-08	0	707	2019	12	8	Sunday	7	85	7.17	147.057	146.313	50.7929	1.12525	19.5745
2019-12-09	0	708	2019	12	9	Monday	26	101	10.56	216.073	231.8	65.1841	1.56618	18.4297
2019-12-10	0	709	2019	12	10	Tuesday	17	128	10.96	161.222	189.264	61.2639	1.35139	23.7361
2019-12-11	0	710	2019	12	11	Wednesday	13	115	7.51	117.145	151.763	64.3768	1.50145	19.1304
2019-12-12	0	711	2019	12	12	Thursday	17	104	6.34	59.1413	90.2246	50.6848	1.0375	25.1926
2019-12-13	0	712	2019	12	13	Friday	8	83	8.8	105.658	122.237	53.5749	1.01528	24.9287
2019-12-14	0	713	2019	12	14	Saturday	9	89	7.16	54.6944	84.9167	53.5139	0.893056	19.9444
2019-12-15	0	714	2019	12	15	Sunday	18	111	9.51	41.0429	55.9028	51.712	0.713889	14.4028
2019-12-16	0	715	2019	12	16	Monday	14	116	10.69	77.1775	63.9716	46.4381	1.30088	8.55177
2019-12-17	0	716	2019	12	17	Tuesday	21	96	7.95	98.6232	103.528	44.2273	1.21313	9.1627
2019-12-18	0	717	2019	12	18	Wednesday	12	74	3.77	42.7778	66.4444	46.9048	0.987302	13.6825
2019-12-19	0	718	2019	12	19	Thursday	11	93	2.44	120.5	116.875	52.9375	1.1375	8.4375
2019-12-20	0	719	2019	12	20	Friday	8	109	3.16	149.973	166.558	58.7639	1.42222	23.7035
2019-12-21	0	720	2019	12	21	Saturday	11	108	5.66	140.26	137.304	49.3409	1.20832	18.7899
2019-12-22	0	721	2019	12	22	Sunday	9	110	6.58	140.972	133.75	44.6162	1.09937	12.2727
2019-12-23	0	722	2019	12	23	Monday	13	98	6.23	138.028	149.583	57.2134	1.49293	12.1347
2019-12-24	0	723	2019	12	24	Tuesday	8	125	7.01	82.3472	99.9807	42.0366	0.902778	18.6806
2019-12-25	0	724	2019	12	25	Wednesday	20	159	8.69	113.597	98.8056	54.5754	1.38152	12.2645
2019-12-26	0	725	2019	12	26	Thursday	16	90	4.77	81.5	89.4167	44.625	1.10833	9.85417
2019-12-27	0	726	2019	12	27	Friday	8	115	3.3	57.4792	79.4167	35.9946	0.716667	10.5208
2019-12-28	0	727	2019	12	28	Saturday	9	116	5.77	75.8822	88.2129	34.7441	0.834783	14.5435
2019-12-29	0	728	2019	12	29	Sunday	6	142	8.26	80.5	79.5208	42.25	1.03125	16.3125
2019-12-30	0	729	2019	12	30	Monday	8	126	6.99	81.4167	109.09	48.2639	1.10694	30.9215
2019-12-31	0	730	2019	12	31	Tuesday	12	103	-1.36	21.7639	57.2778	30.9583	0.540278	10.1495
2020-01-01	1	731	2020	1	1	Wednesday	28	173	2.35	67.7917	87.3472	48.4306	0.855556	31.4419
2020-01-02	0	732	2020	1	2	Thursday	27	176	5.55	121.639	144.028	67.9255	1.16969	21.4255
2020-01-03	0	733	2020	1	3	Friday	13	180	6.12	174.764	193.383	67.2532	1.35213	16.081
2020-01-04	0	734	2020	1	4	Saturday	12	148	7.77	213.583	223.375	79.3542	1.60625	16.3125
2020-01-05	0	735	2020	1	5	Sunday	78	148	8.84	151.812	150.979	63	1.49583	11.8125
2020-01-06	0	736	2020	1	6	Monday	28	162	7.45	99.6458	99.0208	54.9583	1.825	5.14583
2020-01-07	0	737	2020	1	7	Tuesday	22	158	3.01	36.1042	38.2708	44	1.3625	5.375
2020-01-08	0	738	2020	1	8	Wednesday	16	125	1.68	61.5625	68	36.0833	0.933333	8.79167
2020-01-09	0	739	2020	1	9	Thursday	9	134	1.06	74.9583	96.2708	61.9167	1.31875	17.5
2020-01-10	0	740	2020	1	10	Friday	14	142	2.01	103.187	110.083	66.4279	1.31947	20.1848
2020-01-11	0	741	2020	1	11	Saturday	11	130	2.76	193.792	209.271	79.6458	2.08958	16.9583
2020-01-12	0	742	2020	1	12	Sunday	22	131	2.33	87.6458	122.458	64.3958	1.40208	18.3125
2020-01-13	0	743	2020	1	13	Monday	25	132	2.85	141.104	168.458	75.8333	1.58125	17.4375
2020-01-14	0	744	2020	1	14	Tuesday	11	121	0.52	95.5417	117.833	52.9375	1.10625	14.4792
2020-01-15	0	745	2020	1	15	Wednesday	18	134	-0.35	92.7708	104.583	59.1458	1.11458	19.0208
2020-01-16	0	746	2020	1	16	Thursday	27	133	1.16	114.529	132.798	61.6286	1.39683	23.558
2020-01-17	0	747	2020	1	17	Friday	15	119	1.72	139.389	142.265	46.5701	1.24564	13.4846
2020-01-18	0	748	2020	1	18	Saturday	20	107	2.76	130.521	133.083	43.1875	1.05833	9.70833
2020-01-19	0	749	2020	1	19	Sunday	16	107	2.71	162.688	180.333	54.6458	1.50833	8.04167
2020-01-20	0	750	2020	1	20	Monday	18	131	4.08	155.729	190.458	60.1458	1.55208	14.4583
2020-01-21	0	751	2020	1	21	Tuesday	30	141	3.65	124.521	145.625	34.0417	1.17708	22.5
2020-01-22	0	752	2020	1	22	Wednesday	12	118	4.5	118.519	142.209	44.7763	1.24956	12.4288
2020-01-23	0	753	2020	1	23	Thursday	22	94	6.19	151.643	165.431	42.0985	1.56553	10.2708
2020-01-24	1	754	2020	1	24	Friday	15	67	5.13	151.583	169.062	29.6458	1.63542	12.6667
2020-01-25	1	755	2020	1	25	Saturday	7	76	3.63	117.062	155.229	31.4375	0.985417	28.7708
2020-01-26	1	756	2020	1	26	Sunday	29	79	1.15	103.562	103.167	25.2292	1.15208	17.4583
2020-01-27	1	757	2020	1	27	Monday	11	116	1.79	86.5833	94.3958	20.8333	1.00208	13.1458
2020-01-28	1	758	2020	1	28	Tuesday	19	100	2.03	65.5	69.1667	19.7917	0.883333	18.5625
2020-01-29	1	759	2020	1	29	Wednesday	15	100	2.62	160.945	155.443	24.4508	1.54819	21.1141
2020-01-30	1	760	2020	1	30	Thursday	16	106	2.48	134.354	150.417	23.8813	1.34529	17.8523
2020-01-31	1	761	2020	1	31	Friday	20	89	4.51	78.2292	82.125	22.1667	0.8625	15.2708
2020-02-01	0	762	2020	2	1	Saturday	23	105	5.1	104.958	106.458	21.5	1.02917	16.6458
2020-02-02	0	763	2020	2	2	Sunday	19	86	7.01	127.239	129.043	22.4348	1.33913	19.0652
2020-02-03	0	764	2020	2	3	Monday	20	122	5.81	48.2917	57.875	17.7917	0.729167	12.9583
2020-02-04	0	765	2020	2	4	Tuesday	15	90	6.68	97.4583	100.146	20.4167	1.0125	12.4375
2020-02-05	0	766	2020	2	5	Wednesday	22	92	5.98	43.0625	58.0417	17.8071	0.6125	7.6875
2020-02-06	0	767	2020	2	6	Thursday	19	79	3.25	32.6721	38.0109	13.1721	0.572101	6.21649
2020-02-07	0	768	2020	2	7	Friday	15	76	4.38	46.0172	48.9239	9.90341	0.59837	5.88949
2020-02-08	0	769	2020	2	8	Saturday	14	93	5.39	54.3125	59.375	9.10145	0.629167	6.52083
2020-02-09	0	770	2020	2	9	Sunday	20	67	6.85	95.2292	104.25	12.125	0.875	8.83333
2020-02-10	0	771	2020	2	10	Monday	18	115	9.62	66.3958	73.6458	10.6875	0.7875	9.375
2020-02-11	0	772	2020	2	11	Tuesday	22	103	9.82	59.1458	63.4792	13.7292	0.847917	12.5
2020-02-12	0	773	2020	2	12	Wednesday	24	82	10.3	59.6458	57.9583	13.2292	0.9	7.79167
2020-02-13	0	774	2020	2	13	Thursday	25	85	11.9	58.2083	57.4583	12.5208	0.977083	12.0625
2020-02-14	0	775	2020	2	14	Friday	16	66	12.51	51.2681	49.9909	13.0549	0.99678	6.25634
2020-02-15	0	776	2020	2	15	Saturday	16	67	0.72	20.3569	30.2844	11.5181	0.585598	6.69565
2020-02-16	0	777	2020	2	16	Sunday	11	74	-1.49	17.6875	38.3542	15.3542	0.4625	9.6875
2020-02-17	0	778	2020	2	17	Monday	19	78	1.31	30.25	40.5	24.3125	0.6	12.7083
2020-02-18	0	779	2020	2	18	Tuesday	17	91	4.58	32.4583	40.9167	15.8958	0.545833	9.6875
2020-02-19	0	780	2020	2	19	Wednesday	20	82	6.2	47.75	48.5	16.6042	0.704167	14.7083
2020-02-20	0	781	2020	2	20	Thursday	21	111	9.14	70.6667	64.6667	20.6667	0.820833	16.7708
2020-02-21	0	782	2020	2	21	Friday	9	69	8.3	96.1739	110.043	26.2826	0.993478	11.2174
2020-02-22	0	783	2020	2	22	Saturday	24	81	7.84	23.9167	75.3333	23.4167	0.50625	12.1667
2020-02-23	0	784	2020	2	23	Sunday	13	87	10.37	58.6667	97.3125	21.5	0.689583	15.3958
2020-02-24	0	785	2020	2	24	Monday	16	92	16.78	111.167	112.896	35.9167	1.10625	10.7083
2020-02-25	0	786	2020	2	25	Tuesday	18	72	14.53	87.2364	81.0371	28.875	1.09167	7.39583
2020-02-26	0	787	2020	2	26	Wednesday	17	82	10.2	74.4792	85.6667	30.8542	1.1	10.0208
2020-02-27	0	788	2020	2	27	Thursday	10	77	8.39	25.375	39.7708	24.0833	0.545833	8.125
2020-02-28	0	789	2020	2	28	Friday	12	65	8.49	41.5	35.2059	23.0833	0.694444	5.19444
2020-02-29	0	790	2020	2	29	Saturday	13	91	8.19	56.5208	46.1667	18.25	0.772917	5.47917
2020-03-01	0	791	2020	3	1	Sunday	11	105	8.57	66.7708	66.4583	25.9792	0.83125	6.14583
2020-03-02	0	792	2020	3	2	Monday	10	92	6.59	71.0625	71.2292	35.8333	0.966667	9.41667
2020-03-03	0	793	2020	3	3	Tuesday	17	88	6.68	42.8333	56.2083	22.0208	0.645833	8.89583
2020-03-04	0	794	2020	3	4	Wednesday	10	81	6.88	21.1458	41.8958	33.5	0.522917	10.4792
2020-03-05	0	795	2020	3	5	Thursday	17	96	7.05	57.5833	67.8125	30.8125	0.7125	18.0208
2020-03-06	0	796	2020	3	6	Friday	21	88	9.99	81.247	73.3814	27.8913	0.841304	18.413
2020-03-07	0	797	2020	3	7	Saturday	11	103	12.47	84.6875	91.375	35.25	0.897917	13.6875
2020-03-08	0	798	2020	3	8	Sunday	18	85	12.43	91.6458	99.1667	30.0208	0.954167	13.8958
2020-03-09	0	799	2020	3	9	Monday	19	122	11.7	100.854	99.375	38.1667	1.23333	9.02083
2020-03-10	0	800	2020	3	10	Tuesday	8	110	10.15	55.2917	77.7998	23.6856	0.729356	6.12772
2020-03-11	0	801	2020	3	11	Wednesday	21	102	11	53.9158	102.528	24.7973	0.706548	10.6705
2020-03-12	0	802	2020	3	12	Thursday	9	102	11.98	55.5308	99.9475	23.5018	0.816486	11.8895
2020-03-13	0	803	2020	3	13	Friday	18	86	10.19	43.8696	69.3034	23.0909	0.69697	7.67935
2020-03-14	0	804	2020	3	14	Saturday	31	108	8.88	42.5208	67.7708	30.0208	0.7125	9.70833
2020-03-15	0	805	2020	3	15	Sunday	15	130	12.56	33.6739	70.1522	43.4489	0.640909	15.4773
2020-03-16	0	806	2020	3	16	Monday	21	123	12.66	35.6042	60.3958	23.4167	0.614583	16.2708
2020-03-17	0	807	2020	3	17	Tuesday	10	127	15.42	67.5417	85.589	29.964	0.830303	14.0114
2020-03-18	0	808	2020	3	18	Wednesday	14	133	15.92	56.881	102.238	36.1429	0.709524	15.8333
2020-03-19	0	809	2020	3	19	Thursday	16	111	13.98	17.7292	122.292	15.9375	0.375	7.52083
2020-03-20	0	810	2020	3	20	Friday	18	144	15.94	42.5	128.873	22.9022	0.656126	15.0435
2020-03-21	0	811	2020	3	21	Saturday	16	132	19.67	75.625	130.125	26.3542	0.910417	17
2020-03-22	0	812	2020	3	22	Sunday	12	110	16.88	47	91.6042	35.1458	0.825	14.4583
2020-03-23	0	813	2020	3	23	Monday	14	139	13.95	43.0625	68.125	28.7708	0.75625	19.7708
2020-03-24	0	814	2020	3	24	Tuesday	7	138	15.22	41.375	64.0417	24.875	0.722917	20.3542
2020-03-25	0	815	2020	3	25	Wednesday	12	128	18.81	48.4299	62.8542	31.6042	0.85625	18.9167
2020-03-26	0	816	2020	3	26	Thursday	12	120	18.88	43.75	81.8636	27.7955	0.995455	8.25
2020-03-27	0	817	2020	3	27	Friday	8	168	8.5	8	40	16	0.5	6
2020-03-28	0	818	2020	3	28	Saturday	12	114	6.36	17.9583	42.8958	33.375	0.445833	10.3542
2020-03-29	0	819	2020	3	29	Sunday	17	113	5.58	43.2708	59.2292	35.1458	0.63125	11.4792
2020-03-30	0	820	2020	3	30	Monday	16	338	8.47	62.4375	68.625	31.8958	0.658333	9.20833
2020-03-31	0	821	2020	3	31	Tuesday	12	110	9.91	47.0893	50.4583	26.5417	0.625	8.64583
2020-04-01	0	822	2020	4	1	Wednesday	11	141	11.34	47.8542	74.2708	39	0.672917	10.4375
2020-04-02	0	823	2020	4	2	Thursday	10	140	11.98	52.25	66.4375	37.0417	0.791667	14.0625
2020-04-03	0	824	2020	4	3	Friday	11	121	13.12	82.5833	85.25	45.1642	0.889216	13.6005
2020-04-04	1	825	2020	4	4	Saturday	10	97	14.04	57.2609	102.565	37.3043	0.904545	20.7391
2020-04-05	1	826	2020	4	5	Sunday	21	126	11.28	35.375	95.1667	22.2917	0.845833	19.5833
2020-04-06	1	827	2020	4	6	Monday	18	160	13.08	39.4028	65.5871	23.9444	0.654167	11.6806
2020-04-07	0	828	2020	4	7	Tuesday	13	117	13.3	44.5694	69.5417	23.5972	0.6625	11.0417
2020-04-08	0	829	2020	4	8	Wednesday	17	182	14.95	68.4583	103.944	44.5278	0.90625	20.8472
2020-04-09	0	830	2020	4	9	Thursday	18	132	16.57	46.7688	65.6184	28.9611	0.786957	9.90514
2020-04-10	0	831	2020	4	10	Friday	6	116	14.22	41.0556	37.4167	20.8611	0.683333	5.38889
2020-04-11	0	832	2020	4	11	Saturday	11	132	9.1	57.0199	68.0211	23.9082	0.839723	10.1078
2020-04-12	0	833	2020	4	12	Sunday	13	187	11.64	46.375	92.7639	30.5	0.8	12.5417
2020-04-13	0	834	2020	4	13	Monday	13	168	13.45	49.1667	93.0972	43.1528	0.729167	12.8611
2020-04-14	0	835	2020	4	14	Tuesday	15	169	14.55	42.5972	76.5556	23.0694	0.6	12.5833
2020-04-15	0	836	2020	4	15	Wednesday	16	168	17.74	54.8889	81.8056	25.1594	0.929167	19.5199
2020-04-16	0	837	2020	4	16	Thursday	18	166	19.8	40.5833	88.0139	19.75	0.820833	15.7361
2020-04-17	0	838	2020	4	17	Friday	16	145	18.69	44.3037	135.006	32.6129	0.703986	12.2174
2020-04-18	0	839	2020	4	18	Saturday	9	141	13.67	72.8496	84.5296	41.7654	0.895562	13.9686
2020-04-19	0	840	2020	4	19	Sunday	15	124	13.98	55.7917	62.2222	22.9028	0.872917	6.48611
2020-04-20	0	841	2020	4	20	Monday	16	176	13.83	27.3194	68.5278	23.5139	0.604167	8.73611
2020-04-21	0	842	2020	4	21	Tuesday	9	147	14.19	34.1111	79.5556	40.4028	0.679167	15.8056
2020-04-22	0	843	2020	4	22	Wednesday	10	110	14.81	22.9861	82.4221	31.375	0.583333	13.6111
2020-04-23	0	844	2020	4	23	Thursday	10	133	14.29	37.2669	82.5447	44.0833	0.57808	13.809
2020-04-24	0	845	2020	4	24	Friday	9	139	16.37	39.8194	85.5694	40.0749	0.630303	12.692
2020-04-25	0	846	2020	4	25	Saturday	8	132	19.12	37.5652	100.739	28.1159	0.645652	15.7681
2020-04-26	0	847	2020	4	26	Sunday	10	129	19.52	32.8056	71.4342	23.1111	0.608333	13.375
2020-04-27	0	848	2020	4	27	Monday	13	139	14.86	31.1389	52.4583	20.1944	0.575	11.9444
2020-04-28	0	849	2020	4	28	Tuesday	9	155	15.69	30.75	70.2065	17.0556	0.529167	8.44444
2020-04-29	0	850	2020	4	29	Wednesday	18	116	21.12	47.4583	82.6944	22.5	0.885417	14.9861
2020-04-30	0	851	2020	4	30	Thursday	4	131	22.43	47.4022	97.8551	22.0156	1.09339	17.9028
2020-05-01	1	852	2020	5	1	Friday	18	180	22.12	41.8056	78.3732	11.0797	0.842301	10.3422
2020-05-02	1	853	2020	5	2	Saturday	10	141	25.61	41.2778	70.4819	12.5972	1	13.7917
2020-05-03	1	854	2020	5	3	Sunday	15	125	27.48	68.6944	111.694	18.0972	1.33333	14.9444
2020-05-04	1	855	2020	5	4	Monday	9	135	27.18	34.4167	102.097	24.3889	1.04167	12.8889
2020-05-05	1	856	2020	5	5	Tuesday	14	121	19.23	22.5278	59.7111	22.5556	0.827083	8.90278
2020-05-06	0	857	2020	5	6	Wednesday	17	144	19.26	30.0833	65.5845	21.5556	0.860417	22.4722
2020-05-07	0	858	2020	5	7	Thursday	13	109	22.78	31.724	58.1941	23.4511	0.849275	12.2579
2020-05-08	0	859	2020	5	8	Friday	13	111	23.57	17.1427	28.2639	15.2246	0.802083	5.72464
2020-05-09	0	860	2020	5	9	Saturday	11	135	18.79	21.1775	35.7778	15.9495	0.647917	6.13949
2020-05-10	0	861	2020	5	10	Sunday	9	136	20.26	38.6528	72.4444	24.2361	0.93125	7.38889
2020-05-11	0	862	2020	5	11	Monday	12	192	20.43	20.0139	90.6467	23.1944	0.635417	9.11111
2020-05-12	0	863	2020	5	12	Tuesday	15	133	22.24	27.9861	120.67	29.75	0.6375	13.6655
2020-05-13	0	864	2020	5	13	Wednesday	8	135	23.57	53.5942	146.768	24.029	0.867391	13.9565
2020-05-14	0	865	2020	5	14	Thursday	19	132	20.63	58.1083	101.86	28.0219	0.947917	12.9048
2020-05-15	0	866	2020	5	15	Friday	7	135	22.83	48.1335	83.0513	18.7355	0.965217	6.3279
2020-05-16	0	867	2020	5	16	Saturday	11	125	24.51	30.7083	90.5278	15.9028	0.8625	9.04167
2020-05-17	0	868	2020	5	17	Sunday	17	121	25.3	42.9722	177.681	22.3394	0.9375	12.6944
2020-05-18	0	869	2020	5	18	Monday	10	139	21.49	30.3914	152.653	20.75	0.522917	8.84722
2020-05-19	0	870	2020	5	19	Tuesday	11	117	22.92	34.7391	80.6812	36.1739	0.643478	16.1449
2020-05-20	0	871	2020	5	20	Wednesday	13	150	23.46	43.5417	85.7144	34.5972	0.902083	18.2917
2020-05-21	0	872	2020	5	21	Thursday	11	137	23.73	49.3303	92.9584	22.6105	0.960417	18.3116
2020-05-22	0	873	2020	5	22	Friday	10	131	25.14	41.3972	89.4137	26.9764	0.8667	11.9535
2020-05-23	0	874	2020	5	23	Saturday	14	264	27.77	45.5051	104	29.8194	0.927083	11.9722
2020-05-24	0	875	2020	5	24	Sunday	11	116	25.93	36.7911	62.0364	29.0278	0.845833	13.1667
2020-05-25	0	876	2020	5	25	Monday	13	156	22.36	26.9306	70.4444	28.4028	0.685417	11.6528
2020-05-26	0	877	2020	5	26	Tuesday	7	122	24.3	31.2361	70.2222	23.875	0.791667	10.9722
2020-05-27	0	878	2020	5	27	Wednesday	13	161	27.09	25.9167	65	28.625	0.76875	12.0972
2020-05-28	0	879	2020	5	28	Thursday	15	128	27.37	26.7222	71.9167	28.1111	0.814583	18.5278
2020-05-29	0	880	2020	5	29	Friday	11	133	23.71	39.8406	94.8103	20.6667	0.815217	14.2464
2020-05-30	0	881	2020	5	30	Saturday	10	116	24.05	30.726	52.3333	18.0417	0.775	8.22222
2020-05-31	0	882	2020	5	31	Sunday	12	153	27.15	37.0278	65.0694	17	0.835417	5.40278
2020-06-01	0	883	2020	6	1	Monday	9	156	28.98	36.0592	95.8295	24.3598	0.947917	15.5164
2020-06-02	0	884	2020	6	2	Tuesday	10	154	29.29	44.2917	155.389	28.0556	0.689583	9.63889
2020-06-03	0	885	2020	6	3	Wednesday	14	137	28.05	53.202	177.653	36.5139	0.670833	12.6806
2020-06-04	0	886	2020	6	4	Thursday	14	153	29.37	53.5744	113.229	23.643	0.615217	10.336
2020-06-05	0	887	2020	6	5	Friday	27	133	27.15	61.1002	150.794	36.5326	1.01123	16.0308
2020-06-06	0	888	2020	6	6	Saturday	21	112	26.7	47.8274	129.762	20.0278	0.899547	12.5767
2020-06-07	0	889	2020	6	7	Sunday	11	121	27.2	39.1316	107.097	22.4028	0.708333	12.8611
2020-06-08	0	890	2020	6	8	Monday	26	170	27.75	40.673	113.077	19.3106	0.766667	14.2146
2020-06-09	0	891	2020	6	9	Tuesday	16	140	28.11	41.0217	81.2754	19.3913	0.791304	7.23188
2020-06-10	0	892	2020	6	10	Wednesday	24	158	27.73	21.125	44.0097	18.3561	0.764493	7.05556
2020-06-11	0	893	2020	6	11	Thursday	18	123	29.59	34.9523	68.1836	27.1932	0.866667	9.88258
2020-06-12	0	894	2020	6	12	Friday	8	141	29.29	18.9632	35.7234	19.1403	0.758696	5.95652
2020-06-13	0	895	2020	6	13	Saturday	10	131	27.43	21.9861	34.0833	15.4444	0.858333	10.1111
2020-06-14	0	896	2020	6	14	Sunday	11	159	27.58	28.6944	66.4855	24.0669	0.964583	10.8131
2020-06-15	0	897	2020	6	15	Monday	8	158	27.79	31.1806	88.2083	50.4444	0.966667	15.3611
2020-06-16	0	898	2020	6	16	Tuesday	12	138	26.26	36.2609	58.4861	20.4091	0.917992	8.99802
2020-06-17	0	899	2020	6	17	Wednesday	11	126	28.97	13.2361	21.6667	15.5278	0.68125	6.375
2020-06-18	0	900	2020	6	18	Thursday	18	132	22.43	13.3523	21.3611	13.4831	0.702083	5.33635
2020-06-19	0	901	2020	6	19	Friday	10	152	23.44	26.8146	43.9982	21.2917	0.855492	9.29167
2020-06-20	0	902	2020	6	20	Saturday	10	147	24.69	31.2222	55.0556	18.4306	0.866667	10.75
2020-06-21	0	903	2020	6	21	Sunday	15	96	22.69	40.8056	64.6528	16.125	0.89375	13.0139
2020-06-22	0	904	2020	6	22	Monday	14	116	24.2	19.7917	42.2639	11.6806	0.66875	7.84722
2020-06-23	0	905	2020	6	23	Tuesday	12	119	25.27	15.8194	25.5882	15.548	0.8375	6.16667
2020-06-24	0	906	2020	6	24	Wednesday	10	135	26.04	21.1667	43.8472	21.3333	0.783333	10.3611
2020-06-25	1	907	2020	6	25	Thursday	11	140	27.15	39.7639	71.75	18.4621	1.02917	10.4583
2020-06-26	1	908	2020	6	26	Friday	16	119	27.69	32.1908	62.4783	12.3768	0.916395	9.47826
2020-06-27	1	909	2020	6	27	Saturday	10	103	28.01	50.375	85.1528	25.0278	1.0875	11.6944
2020-06-28	0	910	2020	6	28	Sunday	14	107	27.09	41.0211	79.0114	11.9523	1.03161	9.23176
2020-06-29	0	911	2020	6	29	Monday	8	129	25.76	25.8472	50.2639	12.1528	0.722917	10.2355
2020-06-30	0	912	2020	6	30	Tuesday	8	124	26.8	18.1111	35.1528	11.0278	0.81875	6.44143
2020-07-01	0	913	2020	7	1	Wednesday	16	144	26.58	19.1726	39.8986	18.1884	0.847826	11.9025
2020-07-02	0	914	2020	7	2	Thursday	12	137	24.95	40.4136	64.1105	19.4903	0.936413	11.3798
2020-07-03	0	915	2020	7	3	Friday	9	132	25.69	19.3676	40.8019	14.0046	0.832609	6.3913
2020-07-04	0	916	2020	7	4	Saturday	4	111	24.68	26.9722	44.8056	12.8472	0.733333	6.83333
2020-07-05	0	917	2020	7	5	Sunday	19	100	27.06	29.2361	49.7361	11.75	0.808333	6.55556
2020-07-06	0	918	2020	7	6	Monday	21	126	27.65	37.3194	73.9444	16.9306	0.970833	9.5
2020-07-07	0	919	2020	7	7	Tuesday	8	138	27.53	33.2222	64.2361	25.2639	0.964583	10.9722
2020-07-08	0	920	2020	7	8	Wednesday	10	141	26.51	34.9167	59.125	16.3611	0.889583	10.0556
2020-07-09	0	921	2020	7	9	Thursday	11	139	25.57	30.9028	45.1389	17.4571	0.779167	10.4758
2020-07-10	0	922	2020	7	10	Friday	7	147	25.95	28.1902	53.5815	21.6014	0.966008	9.42391
2020-07-11	0	923	2020	7	11	Saturday	4	119	25.98	32.6389	63.3889	26.5972	0.891667	12.5278
2020-07-12	0	924	2020	7	12	Sunday	12	99	27.34	8.21591	20.538	11.3611	0.683333	4.69444
2020-07-13	0	925	2020	7	13	Monday	7	128	23.73	15.0114	30.375	14.6111	0.727083	8.23611
2020-07-14	0	926	2020	7	14	Tuesday	13	206	23.87	35.7917	58.5972	30.2222	0.89375	9.77778
2020-07-15	0	927	2020	7	15	Wednesday	15	106	23.3	38.8472	65.5139	23	0.872917	6.83333
2020-07-16	0	928	2020	7	16	Thursday	8	219	23.47	36.814	64.0537	19.2452	0.814583	6.08877
2020-07-17	0	929	2020	7	17	Friday	19	143	26.08	36.3472	61.3611	16.5417	0.84375	7.84722
2020-07-18	0	930	2020	7	18	Saturday	6	111	27.17	16.2271	34.8128	15.7271	0.817935	6.69066
2020-07-19	0	931	2020	7	19	Sunday	11	105	23.67	22.6667	43.0417	21.7083	0.866667	6.70833
2020-07-20	0	932	2020	7	20	Monday	13	157	25.07	32.1875	57.0245	24.3542	0.8125	9.8125
2020-07-21	0	933	2020	7	21	Tuesday	17	179	25.16	42.3986	61.2971	14.4306	0.939583	9.125
2020-07-22	0	934	2020	7	22	Wednesday	13	111	27.49	16.6042	24.7361	10.3194	0.822917	2.91667
2020-07-23	0	935	2020	7	23	Thursday	16	117	25.35	22.1742	39.3013	16.1172	0.798913	5.81626
2020-07-24	0	936	2020	7	24	Friday	15	127	23.62	27.4375	59.2292	27.1111	0.854167	9.15278
2020-07-25	0	937	2020	7	25	Saturday	6	107	24.49	47.3472	81.6528	24.1389	0.966667	6.19444
2020-07-26	0	938	2020	7	26	Sunday	8	90	24.15	34.7917	53.5694	26.9306	0.985417	4.52778
2020-07-27	0	939	2020	7	27	Monday	12	144	24.55	38.2639	61.2083	23.0556	1.09792	5.81944
2020-07-28	0	940	2020	7	28	Tuesday	10	142	26.93	31.7639	57	15.0278	0.889583	4.56944
2020-07-29	0	941	2020	7	29	Wednesday	11	149	27.85	31.2083	52.0556	14.6389	0.935417	7.19444
2020-07-30	0	942	2020	7	30	Thursday	11	166	27.26	29.0556	52.7917	13.7083	0.977083	7.84722
2020-07-31	0	943	2020	7	31	Friday	19	135	27.8	9.13043	22.7971	8.46377	0.704348	5.05797
2020-08-01	0	944	2020	8	1	Saturday	10	125	28.93	23.6389	42.6806	10.625	0.852083	4.38889
2020-08-02	0	945	2020	8	2	Sunday	7	119	30.09	11.744	23.7917	5.81944	0.722917	3.63889
2020-08-03	0	946	2020	8	3	Monday	12	150	30.27	14.869	32.8472	9.04167	0.76875	4.04167
2020-08-04	0	947	2020	8	4	Tuesday	9	133	29.62	22.2668	31.0833	9.81944	0.820833	4.51389
2020-08-05	0	948	2020	8	5	Wednesday	13	170	30.7	38.4306	57.6111	20.2917	1.16042	4.98611
2020-08-06	0	949	2020	8	6	Thursday	14	179	29.21	19.9107	41.254	14.8732	0.966667	4.69746
2020-08-07	0	950	2020	8	7	Friday	18	129	28.86	16.1008	23.2615	9.45828	0.86917	4.09574
2020-08-08	0	951	2020	8	8	Saturday	10	116	28.71	32.8712	56.7758	16.1237	1.15985	4.78409
2020-08-09	0	952	2020	8	9	Sunday	9	116	28.14	33.0972	59.1157	23.875	1.07292	6.15278
2020-08-10	0	953	2020	8	10	Monday	10	121	28.44	42.3611	68.5972	18.1111	1.11042	7.125
2020-08-11	0	954	2020	8	11	Tuesday	14	166	28.51	45.375	72.5556	13.2917	1.18125	5.48611
2020-08-12	0	955	2020	8	12	Wednesday	10	124	28.86	27.375	50.8611	12	1.01458	5.19444
2020-08-13	0	956	2020	8	13	Thursday	16	106	29.13	13.498	32.3651	7.34921	0.83631	4.86905
2020-08-14	0	957	2020	8	14	Friday	12	99	28.63	15.2228	29.976	10.003	0.842235	4.94856
2020-08-15	0	958	2020	8	15	Saturday	11	122	29.73	19.2216	37.0006	11.3249	0.83125	4.91184
2020-08-16	0	959	2020	8	16	Sunday	8	146	30.17	26.1389	53.8611	19.8194	0.95625	5.15278
2020-08-17	0	960	2020	8	17	Monday	14	135	30.08	25.1528	52.7197	19.8056	0.960417	3.76389
2020-08-18	0	961	2020	8	18	Tuesday	17	137	30.58	28.1667	54.2778	11.875	0.95	4.09722
2020-08-19	0	962	2020	8	19	Wednesday	15	110	30.75	21.4734	46.0097	18.7917	0.872736	5.71739
2020-08-20	0	963	2020	8	20	Thursday	15	149	27.7	13.1389	26.5694	16.628	0.845833	4.36534
2020-08-21	0	964	2020	8	21	Friday	12	144	26.64	21.9489	38.5103	18.878	1.01749	6.11775
2020-08-22	0	965	2020	8	22	Saturday	18	100	27.09	28.5	51.7917	25.0972	0.839583	6.54167
2020-08-23	0	966	2020	8	23	Sunday	12	109	28.63	42.4444	66.5972	18.4861	0.989583	7.55556
2020-08-24	0	967	2020	8	24	Monday	12	130	29.82	26.25	46.7361	11.3194	1.02083	5.27778
2020-08-25	0	968	2020	8	25	Tuesday	9	131	27.28	14.375	39.7361	24.1389	0.952083	8.88889
2020-08-26	0	969	2020	8	26	Wednesday	16	103	25.34	30.4167	56.8056	26.375	1.18958	13.2361
2020-08-27	0	970	2020	8	27	Thursday	14	103	25	20.8333	41.0278	23.6111	0.858333	8.41667
2020-08-28	0	971	2020	8	28	Friday	8	107	25.59	28.643	58.7971	27.4447	0.986957	7.44532
2020-08-29	0	972	2020	8	29	Saturday	6	102	25.56	44.25	79.75	33.4167	1.08125	7.13889
2020-08-30	0	973	2020	8	30	Sunday	13	109	27.34	45.1111	75.9444	21.3611	1.17917	9.18056
2020-08-31	0	974	2020	8	31	Monday	9	107	28.21	57.9291	94.1806	18.3914	1.2875	7.19192
2020-09-01	0	975	2020	9	1	Tuesday	19	134	27.23	40.6301	54.5857	17.9167	0.991667	8
2020-09-02	0	976	2020	9	2	Wednesday	9	116	25.96	19.2033	54.8889	25.8864	0.80625	10.3763
2020-09-03	0	977	2020	9	3	Thursday	14	112	25.07	14.2355	43.1932	29.25	0.654167	10.8333
2020-09-04	0	978	2020	9	4	Friday	9	102	26.27	28.8261	66.0284	33.3768	0.88913	14.3478
2020-09-05	0	979	2020	9	5	Saturday	16	141	26.07	25.4861	61.3333	23.4167	0.73125	9.47222
2020-09-06	0	980	2020	9	6	Sunday	8	119	26.67	33.3056	71.375	32.2639	0.889583	9.61111
2020-09-07	0	981	2020	9	7	Monday	10	122	25.9	47.6008	90.1534	35.0909	1.08163	16.5316
2020-09-08	0	982	2020	9	8	Tuesday	11	112	26.9	28.6383	62.2645	21.428	0.830655	7.2619
2020-09-09	0	983	2020	9	9	Wednesday	11	116	26.69	27.8333	54.625	29.9306	0.875	10.6944
2020-09-10	0	984	2020	9	10	Thursday	17	136	23.46	29.3998	52.4795	29.2487	0.845265	8.12681
2020-09-11	0	985	2020	9	11	Friday	14	143	23.02	18.6612	42	25.2449	0.867844	7.92271
2020-09-12	0	986	2020	9	12	Saturday	10	108	23.19	24.3502	47.2494	29.6477	0.992424	10.7854
2020-09-13	0	987	2020	9	13	Sunday	18	158	23.65	37.3889	66.2083	35.0114	1.10833	10.851
2020-09-14	0	988	2020	9	14	Monday	13	167	23.08	31.5012	61.2603	30.4583	0.997917	9.70833
2020-09-15	0	989	2020	9	15	Tuesday	16	128	23.3	31.5139	56.5	17.9583	0.977083	13.4444
2020-09-16	0	990	2020	9	16	Wednesday	10	131	23.81	33.0556	66.0972	21.75	0.920833	12.3472
2020-09-17	0	991	2020	9	17	Thursday	10	110	21.12	15.3539	48.3804	39.3762	0.743478	14.6075
2020-09-18	0	992	2020	9	18	Friday	20	132	20.58	33.9104	74.3258	46.8826	0.922348	13.7361
2020-09-19	0	993	2020	9	19	Saturday	4	86	21.06	29.3075	63.1429	25.9345	0.74494	9.77381
2020-09-20	0	994	2020	9	20	Sunday	18	101	21.09	34.5217	72.2609	36.3478	0.85	13.6087
2020-09-21	0	995	2020	9	21	Monday	11	116	20.34	56.0139	116.056	73.1667	1.11667	14.5694
2020-09-22	0	996	2020	9	22	Tuesday	18	78	19.64	48.3056	86.4583	30.9722	0.997917	11.1806
2020-09-23	0	997	2020	9	23	Wednesday	17	117	21.32	21.2083	55.1667	29.3056	0.902083	13.9583
2020-09-24	0	998	2020	9	24	Thursday	16	104	21.43	48.1715	76.3333	31.6087	0.984585	14.1159
2020-09-25	0	999	2020	9	25	Friday	15	105	21.29	54.7778	86.6111	26.4028	1.17917	13.3333
2020-09-26	0	1000	2020	9	26	Saturday	7	90	21.84	39.6087	74.8841	40.4638	0.997826	9.62319
2020-09-27	0	1001	2020	9	27	Sunday	6	91	21.12	19.7719	49.4035	26.9649	0.707895	14.0702
2020-09-28	0	1002	2020	9	28	Monday	13	89	21.74	22.6389	48.4028	26.7222	0.675	22.3883
2020-09-29	0	1003	2020	9	29	Tuesday	15	100	22.24	34.9861	66.8889	37.9722	0.827083	20.2337
2020-09-30	0	1004	2020	9	30	Wednesday	9	103	21.15	31.8472	57.0139	28.25	0.902083	12.1274
2020-10-01	1	1005	2020	10	1	Thursday	13	87	22.19	40.0278	73.625	23.9444	0.88125	11.7083
2020-10-02	1	1006	2020	10	2	Friday	9	121	22.62	34.6087	71.1014	28.0244	0.781324	9.65217
2020-10-03	1	1007	2020	10	3	Saturday	7	121	20.25	45.625	87.2222	55.3889	1.22917	20.6111
2020-10-04	1	1008	2020	10	4	Sunday	11	87	15.98	31.4638	89.3623	32.7246	0.682609	9.95652
2020-10-05	1	1009	2020	10	5	Monday	21	99	12.8	26.1667	61.7424	44.7727	0.654545	11.4697
2020-10-06	1	1010	2020	10	6	Tuesday	12	100	14.51	46.8131	81.2659	45.6528	0.827083	13.2361
2020-10-07	1	1011	2020	10	7	Wednesday	19	151	15.43	49.0109	75.8939	49.7192	0.905888	14.7464
2020-10-08	1	1012	2020	10	8	Thursday	23	108	16.45	45.5139	77.5556	67.2083	1.06458	12.4306
2020-10-09	0	1013	2020	10	9	Friday	21	117	17.28	35.3659	69.2808	54.4891	1.05851	10.0779
2020-10-10	0	1014	2020	10	10	Saturday	21	85	17.64	52.726	98.8373	73.2602	1.42955	17.3953
2020-10-11	0	1015	2020	10	11	Sunday	10	83	18.48	47.029	80.1014	53.8406	1.12174	13.0435
2020-10-12	0	1016	2020	10	12	Monday	14	93	18.52	33.8472	61.1806	38.2222	0.8375	7.52778
2020-10-13	0	1017	2020	10	13	Tuesday	18	111	18.62	46.8056	79.3611	55.8889	0.977083	9.88889
2020-10-14	0	1018	2020	10	14	Wednesday	14	110	17.4	36.4203	47.4928	38.7826	1	6.88406
2020-10-15	0	1019	2020	10	15	Thursday	20	118	16.23	30.2083	46.625	39.0278	1.04167	10.5694
2020-10-16	0	1020	2020	10	16	Friday	12	114	15.41	52.7971	66.5652	40.6574	0.965217	9.34783
2020-10-17	0	1021	2020	10	17	Saturday	8	95	13.97	59.0278	71.2778	56.9722	0.879801	12.4583
2020-10-18	0	1022	2020	10	18	Sunday	23	103	14.19	63.3841	63.8696	43.058	0.858696	11.3768
2020-10-19	0	1023	2020	10	19	Monday	21	133	14.86	83.2357	86.2532	56.3056	1.025	14.1528
2020-10-20	0	1024	2020	10	20	Tuesday	17	134	14.56	97.6667	97.4028	54.0833	1.04792	18.9028
2020-10-21	0	1025	2020	10	21	Wednesday	22	81	16.05	77.0606	152.682	38.6515	0.868182	11.4697
2020-10-22	0	1026	2020	10	22	Thursday	13	139	13.69	52.3194	181.944	50.4233	0.844203	16.2742
2020-10-23	0	1027	2020	10	23	Friday	14	98	11.81	24.4431	71.2841	37.8278	0.630952	12.2413
2020-10-24	0	1028	2020	10	24	Saturday	15	111	11.81	36.5833	60.2506	44.4722	0.802083	17.3889
2020-10-25	0	1029	2020	10	25	Sunday	20	93	13.74	78.1014	85.2899	49.7826	0.936957	19.2609
2020-10-26	0	1030	2020	10	26	Monday	13	134	15.74	87.4413	102.21	53.1123	1.1462	21.6667
2020-10-27	0	1031	2020	10	27	Tuesday	21	101	16.14	99.1806	141.861	87.1389	1.47708	18.3333
2020-10-28	0	1032	2020	10	28	Wednesday	9	82	16.53	40.8261	92.1884	55.913	1.20217	18.5217
2020-10-29	0	1033	2020	10	29	Thursday	16	92	16.05	54.7361	86.3056	43.7361	1.16458	21.75
2020-10-30	0	1034	2020	10	30	Friday	13	80	14.76	80.4758	103.175	47.0519	1.18859	17.0694
2020-10-31	0	1035	2020	10	31	Saturday	11	77	16.24	76.2725	91.8835	43.8647	1.08587	15.8551
2020-11-01	0	1036	2020	11	1	Sunday	16	86	17.23	93.3768	153.652	62.0435	1.16522	17.5362
2020-11-02	0	1037	2020	11	2	Monday	13	95	14.23	54.9167	121.542	49.8194	0.825	12.9028
2020-11-03	0	1038	2020	11	3	Tuesday	17	73	10.49	29.5972	79.1389	51.5972	0.75625	12.7361
2020-11-04	0	1039	2020	11	4	Wednesday	15	74	11.08	42.5833	73.9874	43.3333	0.66875	16.1661
2020-11-05	0	1040	2020	11	5	Thursday	21	82	14.3	54.7639	75.9722	43.2639	0.79375	23.5139
2020-11-06	0	1041	2020	11	6	Friday	14	96	15.98	111.731	131.743	69.1461	1.30208	16.035
2020-11-07	0	1042	2020	11	7	Saturday	9	117	14.28	57.6944	135.986	63.9704	0.973913	23.2337
2020-11-08	0	1043	2020	11	8	Sunday	14	112	12.59	30.8116	93.5362	47.1014	0.721739	16.6087
2020-11-09	0	1044	2020	11	9	Monday	19	98	12.38	46.125	92.6389	58.0278	1.04167	20.375
2020-11-10	0	1045	2020	11	10	Tuesday	13	106	12.11	81.3333	114.667	52.7917	1.15208	28.3641
2020-11-11	0	1046	2020	11	11	Wednesday	23	97	12.26	78.4848	109.091	45.6364	0.918182	27.1061
2020-11-12	0	1047	2020	11	12	Thursday	14	93	13.05	74.0694	86.9444	43.8194	0.90625	19.1806
2020-11-13	0	1048	2020	11	13	Friday	14	91	13.17	135.414	155.432	76.1275	1.44299	26.8585
2020-11-14	0	1049	2020	11	14	Saturday	6	64	12.53	80.8973	98.2754	36.2222	1.0339	15.7652
2020-11-15	0	1050	2020	11	15	Sunday	19	71	13.93	71.7917	92.3056	32.9444	1	10.7083
2020-11-16	0	1051	2020	11	16	Monday	21	122	15.16	65.6667	82.1944	32.8611	0.858333	8.65278
2020-11-17	0	1052	2020	11	17	Tuesday	14	82	17.99	39.4861	51.1806	30.2361	0.916667	5.19444
2020-11-18	0	1053	2020	11	18	Wednesday	20	72	19.77	17.1667	22.7083	24.1806	1.2875	3.875
2020-11-19	0	1054	2020	11	19	Thursday	26	94	13.82	30.1594	44.2464	33.5942	1.17174	6.23188
2020-11-20	0	1055	2020	11	20	Friday	19	81	10.83	33.1806	42.7778	32.1014	0.906703	8.78744
2020-11-21	0	1056	2020	11	21	Saturday	13	66	10.1	53.6219	48.5494	24.7411	0.68666	4.67655
2020-11-22	0	1057	2020	11	22	Sunday	12	171	6.99	34.0278	36.8889	33.1667	1	6.02778
2020-11-23	0	1058	2020	11	23	Monday	14	96	4.76	29.1528	40.2778	35.1111	0.533333	8.22222
2020-11-24	0	1059	2020	11	24	Tuesday	5	97	4.86	47.9815	59.2037	44.2407	0.605556	10.9074
2020-11-25	0	1060	2020	11	25	Wednesday	17	84	5.09	91.5652	93.3913	53.971	0.878261	14.971
2020-11-26	0	1061	2020	11	26	Thursday	20	78	6.18	133.819	140.34	58.5193	1.43182	14.6364
2020-11-27	0	1062	2020	11	27	Friday	15	64	7.22	85.3701	108.643	45.572	1.31136	13.5217
2020-11-28	0	1063	2020	11	28	Saturday	12	58	4.76	48.0694	60.8194	45.875	0.98125	15.5
2020-11-29	0	1064	2020	11	29	Sunday	8	129	4.45	110.377	109.174	44.5217	1.1413	11.7101
2020-11-30	0	1065	2020	11	30	Monday	20	148	3.94	126.365	140.883	52.4722	1.33958	16.6048
2020-12-01	0	1066	2020	12	1	Tuesday	29	120	4.59	95.7361	108.639	51.4167	1.13958	15.4861
2020-12-02	0	1067	2020	12	2	Wednesday	33	83	4.01	116.255	110.366	34.7645	1.28089	8.91135
2020-12-03	0	1068	2020	12	3	Thursday	24	108	2.69	83.1111	87.6111	36.9222	0.95	10.0278
2020-12-04	0	1069	2020	12	4	Friday	22	139	2.05	64.0344	81.8804	50.4356	0.843371	12.0492
2020-12-05	0	1070	2020	12	5	Saturday	23	100	2.6	87.7619	102.579	51.197	0.869129	13.6286
2020-12-06	0	1071	2020	12	6	Sunday	16	76	4.89	84.9855	98.1739	51.087	0.919565	15.6522
2020-12-07	0	1072	2020	12	7	Monday	22	94	6.08	97.0411	115.728	46.1263	1.05758	15.3864
2020-12-08	0	1073	2020	12	8	Tuesday	18	107	5.34	40.8031	63.5139	38.8373	0.715417	17.3353
2020-12-09	0	1074	2020	12	9	Wednesday	28	113	6	61.125	78.5694	47.7361	0.852083	27.8611
2020-12-10	0	1075	2020	12	10	Thursday	24	96	6.38	118.856	118.52	40.2739	0.986759	10.4607
2020-12-11	0	1076	2020	12	11	Friday	19	114	6.09	171.448	190.609	46.1995	1.4253	9.87121
2020-12-12	0	1077	2020	12	12	Saturday	19	83	5.56	137.672	153.742	43.5157	1.53795	7.79529
2020-12-13	0	1078	2020	12	13	Sunday	26	83	3.23	51.1389	90.7778	21.4771	0.719837	6.96316
2020-12-14	0	1079	2020	12	14	Monday	20	124	-1.37	15.7391	40.4638	25.8841	0.413043	10.3333
2020-12-15	0	1080	2020	12	15	Tuesday	15	76	-1.55	41.8278	66.9941	43.4	0.6275	12.2667
2020-12-16	0	1081	2020	12	16	Wednesday	13	85	-0.74	72.75	106.706	60.1471	1.02941	16.5294
2020-12-17	0	1082	2020	12	17	Thursday	15	102	0.46	88.942	104.275	54.058	0.945652	13.9275
2020-12-18	0	1083	2020	12	18	Friday	18	91	1.71	76.1667	107.167	54.6042	0.95	14.7083
2020-12-19	0	1084	2020	12	19	Saturday	9	76	0.63	49.8826	63.6086	35.9432	0.810038	11.0442
2020-12-20	0	1085	2020	12	20	Sunday	17	88	1.91	86.1503	104.086	55.2621	1.0596	14.3726
2020-12-21	0	1086	2020	12	21	Monday	21	109	2.31	126.864	143.15	59.2512	1.38958	18.0622
2020-12-22	0	1087	2020	12	22	Tuesday	23	138	3.65	94.2361	106.875	41.6818	1.05571	16.4558
2020-12-23	0	1088	2020	12	23	Wednesday	8	102	5.44	85.2614	117.074	55.8686	1.26989	22.3511
2020-12-24	0	1089	2020	12	24	Thursday	21	112	4.04	82.2045	126.264	60.6721	1.55	23.8611
2020-12-25	0	1090	2020	12	25	Friday	20	92	3.95	106.619	134.101	59.6347	1.38478	23.7971
2020-12-26	0	1091	2020	12	26	Saturday	25	98	5.87	101.125	136.556	61.8889	1.26042	24.9444
2020-12-27	0	1092	2020	12	27	Sunday	11	99	7.65	144.462	180.28	55.528	1.51667	17.4361
2020-12-28	0	1093	2020	12	28	Monday	26	112	8.15	191.188	223.862	71.3472	1.90616	18.856
2020-12-29	0	1094	2020	12	29	Tuesday	18	83	1.38	27.4394	53.697	19.5758	0.743182	6.98485
2020-12-30	0	1095	2020	12	30	Wednesday	22	134	-5.59	19.9078	66.971	25.7854	0.617045	12.4444
2020-12-31	0	1096	2020	12	31	Thursday	32	94	-4.35	42.5972	79.1944	43.5278	0.8625	23.1944
2021-01-01	1	1097	2021	1	1	Friday	27	164	-1.04	53.3367	78.0224	42.5197	0.8475	11.6829
2021-01-02	1	1098	2021	1	2	Saturday	26	140	0.31	100.531	123.458	53.7812	1.14583	19.7812
2021-01-03	1	1099	2021	1	3	Sunday	30	161	0.93	159.877	191.46	78.8602	1.93043	22.7678
2021-01-04	0	1100	2021	1	4	Monday	21	177	2.34	192.024	228.192	71.938	2.11984	18.5236
2021-01-05	0	1101	2021	1	5	Tuesday	33	154	2.26	64.2083	96.9013	41.8646	1.22292	15.3229
2021-01-06	0	1102	2021	1	6	Wednesday	20	161	-0.21	78.5333	162.64	33.2568	1.08958	10.3617
2021-01-07	0	1103	2021	1	7	Thursday	21	97	-5.6	16.0761	68.1377	14.913	0.482609	9.65373
2021-01-08	0	1104	2021	1	8	Friday	31	125	-3.4	40.5938	78.4688	34.2604	0.760417	15.3854
2021-01-09	0	1105	2021	1	9	Saturday	21	145	-2.76	51.8826	87.1245	43.1823	0.9625	18.2337
2021-01-10	0	1106	2021	1	10	Sunday	30	151	0.01	58.8475	93.9953	51.1771	1.00344	22.1096
2021-01-11	0	1107	2021	1	11	Monday	35	178	-0.26	58.0426	122.182	45.9737	1.02917	20.6591
2021-01-12	0	1108	2021	1	12	Tuesday	23	134	1.61	68.0691	243.269	39.875	0.729167	14.1562
2021-01-13	0	1109	2021	1	13	Wednesday	32	151	4.9	75.2287	133.542	47.6591	0.966667	18.0294
2021-01-14	0	1110	2021	1	14	Thursday	17	162	7.84	96.8333	175.173	58.8333	1.26667	27
2021-01-15	0	1111	2021	1	15	Friday	26	165	5.19	88.7691	260.179	53.0625	1.38274	19.9241
2021-01-16	0	1112	2021	1	16	Saturday	23	120	0.17	72.1404	153.969	39.1825	0.974094	11.5833
2021-01-17	0	1113	2021	1	17	Sunday	18	118	0.95	73.5729	165.094	44.3438	1.01875	22.1111
2021-01-18	0	1114	2021	1	18	Monday	26	148	4.22	62.5063	112.011	41.9062	0.804167	18.4028
2021-01-19	0	1115	2021	1	19	Tuesday	23	133	4.5	59.1667	122.792	27.875	0.902083	15.5556
2021-01-20	0	1116	2021	1	20	Wednesday	19	130	6.31	68.6101	100.944	33.1289	0.882609	11.305
2021-01-21	0	1117	2021	1	21	Thursday	26	123	8.61	164.036	200.303	61.7115	1.50562	15.5014
2021-01-22	0	1118	2021	1	22	Friday	25	153	7.38	233.705	292.263	77.5208	2.3375	20.3438
2021-01-23	0	1119	2021	1	23	Saturday	23	119	5.59	221.938	279.365	79.0729	2.55	19.5208
2021-01-24	0	1120	2021	1	24	Sunday	14	97	5.6	220.507	274.939	80.1119	2.14257	23.9792
2021-01-25	0	1121	2021	1	25	Monday	23	110	6.15	168.82	199.039	66.0862	2.18125	12.51
2021-01-26	0	1122	2021	1	26	Tuesday	20	153	4.19	125.208	161.562	50.6042	1.725	15.3542
2021-01-27	0	1123	2021	1	27	Wednesday	21	135	6	110.021	139.537	45.8573	1.5375	13.2216
2021-01-28	0	1124	2021	1	28	Thursday	22	130	4.05	53.0972	158.931	29.9722	0.923611	8.78125
2021-01-29	0	1125	2021	1	29	Friday	16	141	3.09	50.6087	172.174	33.3913	0.821739	12.1196
2021-01-30	0	1126	2021	1	30	Saturday	10	104	7.65	76.2188	162.958	45.7083	1.08125	13.5938
2021-01-31	0	1127	2021	1	31	Sunday	16	116	8.37	86.8474	150.35	53.2373	1.16024	21.0942
2021-02-01	0	1128	2021	2	1	Monday	34	184	7.73	64.5543	149.178	39.0661	0.977899	12.5806
2021-02-02	0	1129	2021	2	2	Tuesday	26	119	5.15	38.9277	83.3043	33.1168	0.958696	13.5198
2021-02-03	0	1130	2021	2	3	Wednesday	21	103	7.51	78.2536	135.357	35.7621	1.08542	15.313
2021-02-04	0	1131	2021	2	4	Thursday	27	104	6.76	69.1042	120.938	37.2604	1.09375	16.0104
2021-02-05	0	1132	2021	2	5	Friday	32	127	7.69	70.9306	109.944	28.7778	0.970833	15.2222
2021-02-06	0	1133	2021	2	6	Saturday	35	103	9.73	66.6822	121.967	29.9285	0.958333	17.8208
2021-02-07	0	1134	2021	2	7	Sunday	22	93	10.43	71.5338	128.655	24.0987	1.0798	14.8709
2021-02-08	0	1135	2021	2	8	Monday	26	157	5.38	30.2188	47.4479	19.4375	0.772917	12.5833
2021-02-09	0	1136	2021	2	9	Tuesday	19	124	5.24	39.0503	55.9062	19.9968	0.772917	12.3229
2021-02-10	0	1137	2021	2	10	Wednesday	14	127	6.94	62.125	75.9153	27.0009	0.9875	16.4366
2021-02-11	1	1138	2021	2	11	Thursday	10	82	9.55	97.8646	110.729	21.8333	1.11875	18.0625
2021-02-12	1	1139	2021	2	12	Friday	8	46	10.41	75.1875	85.1354	10.4896	0.875	12.2917
2021-02-13	1	1140	2021	2	13	Saturday	28	98	12.33	57.125	66.6354	10.8229	0.93125	11.8333
2021-02-14	1	1141	2021	2	14	Sunday	16	126	12.35	78.5244	76.9479	13.9271	1.15417	7.23958
2021-02-15	1	1142	2021	2	15	Monday	21	120	7.93	45.0521	60.0208	9.89583	0.854167	5.9375
2021-02-16	1	1143	2021	2	16	Tuesday	24	142	7.75	42.8949	68.1771	11.7083	0.820833	7.23958
2021-02-17	1	1144	2021	2	17	Wednesday	17	137	4.23	18.8822	49.4099	14.5996	0.803804	11.0738
2021-02-18	0	1145	2021	2	18	Thursday	14	141	5.95	51.0133	77.4782	23.0226	0.925	12.4536
2021-02-19	0	1146	2021	2	19	Friday	18	146	11.48	54.7609	91.5543	20.0326	0.854348	10.8261
2021-02-20	0	1147	2021	2	20	Saturday	24	185	14.76	48.7812	93.9792	25.5881	0.841667	12.3438
2021-02-21	0	1148	2021	2	21	Sunday	17	132	16.46	46.0662	73.9504	22.1094	0.824387	11.296
2021-02-22	0	1149	2021	2	22	Monday	21	166	15.23	60.9271	120.26	33.9583	1.03125	12.9479
2021-02-23	0	1150	2021	2	23	Tuesday	24	153	8.79	19.7708	51.1771	17.75	0.7875	10.4896
2021-02-24	0	1151	2021	2	24	Wednesday	14	164	9.25	25.9536	47.7453	20.3863	0.783333	8.09375
2021-02-25	0	1152	2021	2	25	Thursday	17	131	7.17	43.9035	42.3865	27.2808	1.1144	6.21694
2021-02-26	0	1153	2021	2	26	Friday	13	121	5.63	72.1771	95.4438	30.2604	1.16458	11.6458
2021-02-27	0	1154	2021	2	27	Saturday	26	122	8.26	61.5417	82.8601	35.5312	0.954167	13.5521
2021-02-28	0	1155	2021	2	28	Sunday	12	120	10.14	46.5	62.4792	31.6354	0.995833	8.79167
2021-03-01	0	1156	2021	3	1	Monday	20	182	8.23	23.8333	32.7812	20.3229	0.858333	5.48958
2021-03-02	0	1157	2021	3	2	Tuesday	21	161	5.58	51.1562	67.1193	25.5417	0.929167	8.4858
2021-03-03	0	1158	2021	3	3	Wednesday	24	193	8.57	39.7314	62.6877	23.5045	0.775	8.98193
2021-03-04	0	1159	2021	3	4	Thursday	6	145	10.57	60.817	82.1979	30.2485	1.04792	11.635
2021-03-05	0	1160	2021	3	5	Friday	27	211	11.05	60.2024	85.1544	32.8528	1.05208	12.7129
2021-03-06	0	1161	2021	3	6	Saturday	20	150	9.1	45.8125	87.6146	23.1875	0.852083	8.97917
2021-03-07	0	1162	2021	3	7	Sunday	16	118	6.39	56.125	89.8542	39.875	1.09167	16.5833
2021-03-08	0	1163	2021	3	8	Monday	32	145	7.54	85.2898	119.183	44.9545	1.15606	14.304
2021-03-09	0	1164	2021	3	9	Tuesday	18	138	9.99	55.49	71.5149	28.6771	0.857576	8.41667
2021-03-10	0	1165	2021	3	10	Wednesday	20	195	10.57	58.05	73.9541	29.2652	0.897159	8.89422
2021-03-11	0	1166	2021	3	11	Thursday	14	128	10.11	71.8981	89.067	29.7486	1.00272	10.2518
2021-03-12	0	1167	2021	3	12	Friday	16	134	9.97	59.7401	73.2531	31.0128	0.952083	7.47503
2021-03-13	0	1168	2021	3	13	Saturday	22	155	10.62	60.2337	74.2287	30.1409	0.895652	7.52083
2021-03-14	0	1169	2021	3	14	Sunday	14	111	13.42	82.5851	101.839	32.0548	1.04792	10.7679
2021-03-15	0	1170	2021	3	15	Monday	25	177	16.17	106.638	130.542	28.0625	1.24583	11.7562
2021-03-16	0	1171	2021	3	16	Tuesday	20	161	14.19	136.531	1017.14	24.1354	0.808333	10.3958
2021-03-17	0	1172	2021	3	17	Wednesday	22	138	10.53	51.0851	233.267	35.3111	0.902083	20.6997
2021-03-18	0	1173	2021	3	18	Thursday	19	165	10.34	36.6979	89.3333	40.8021	1.075	13.7188
2021-03-19	0	1174	2021	3	19	Friday	21	135	9.57	55.8049	115.188	42.3252	1.27002	16.5312
2021-03-20	0	1175	2021	3	20	Saturday	15	123	9.26	60.3229	95.1271	23.9271	0.9875	8.44792
2021-03-21	0	1176	2021	3	21	Sunday	14	123	9.37	18.3125	123.667	19.6875	0.6375	8.10417
2021-03-22	0	1177	2021	3	22	Monday	20	146	9.25	27.0521	91.0521	32.6042	0.754167	12.2396
2021-03-23	0	1178	2021	3	23	Tuesday	14	136	10.51	28.9896	96.4583	17.1979	0.697917	9.71875
2021-03-24	0	1179	2021	3	24	Wednesday	13	148	13.65	40.8958	106.844	29.625	0.860417	10.8438
2021-03-25	0	1180	2021	3	25	Thursday	10	145	15.05	55.4778	132.231	44.0041	1.02083	12.0933
2021-03-26	0	1181	2021	3	26	Friday	12	137	16.39	74.3333	124	35.0312	1.09583	16.6979
2021-03-27	0	1182	2021	3	27	Saturday	17	99	15.51	110.084	130.253	32.9361	1.24384	8.56629
2021-03-28	0	1183	2021	3	28	Sunday	16	117	17.7	141.23	498.518	21.1847	1.15057	9.73596
2021-03-29	0	1184	2021	3	29	Monday	20	105	18.95	142.228	641.552	33.4583	1.00417	15.0104
2021-03-30	0	1185	2021	3	30	Tuesday	8	127	15.25	52.9479	229.354	32.3438	0.983333	13.4062
2021-03-31	0	1186	2021	3	31	Wednesday	22	124	13.87	43.9301	156.052	36.4792	0.939583	12.4167
2021-04-01	0	1187	2021	4	1	Thursday	14	148	14.63	30.1457	88.2242	31.2826	0.770833	8.61269
2021-04-02	0	1188	2021	4	2	Friday	13	132	14.71	23.7631	42.6307	18.183	0.889312	6.39447
2021-04-03	1	1189	2021	4	3	Saturday	13	116	12.93	18.0716	30.216	14.6721	0.806522	6.42346
2021-04-04	1	1190	2021	4	4	Sunday	13	135	11.04	24.3438	54.9583	23.6771	0.741667	11.6667
2021-04-05	1	1191	2021	4	5	Monday	25	135	11.9	29.7955	59.875	26.2396	0.7875	13.7083
2021-04-06	0	1192	2021	4	6	Tuesday	27	218	14.37	38.6875	65.9792	31.5	0.85	9.71875
2021-04-07	0	1193	2021	4	7	Wednesday	18	159	12.8	75.49	117.623	48.6653	1.07083	17.0748
2021-04-08	0	1194	2021	4	8	Thursday	23	183	12.9	88.3333	129.078	35.005	1.14275	20.1295
2021-04-09	0	1195	2021	4	9	Friday	23	132	13.26	70.8572	106.409	25.0761	0.965217	12.587
2021-04-10	0	1196	2021	4	10	Saturday	16	129	13.49	41.5104	80.8229	26.9167	0.870833	15.6771
2021-04-11	0	1197	2021	4	11	Sunday	23	133	14.12	36.8937	67.8093	17.0322	0.855888	9.87092
2021-04-12	0	1198	2021	4	12	Monday	27	140	14.83	56.4018	80.7812	22.9062	0.910417	7.6875
2021-04-13	0	1199	2021	4	13	Tuesday	26	278	16.2	32.7708	77.75	20.1667	0.816667	8.33333
2021-04-14	0	1200	2021	4	14	Wednesday	35	294	12.08	24.6522	64.4149	20.0652	0.741667	10.0725
2021-04-15	0	1201	2021	4	15	Thursday	29	160	15.83	49.2917	79.7708	13.7264	0.927083	10.0938
2021-04-16	0	1202	2021	4	16	Friday	16	160	16.21	93.9375	496.51	13.5159	0.703895	7.55966
2021-04-17	0	1203	2021	4	17	Saturday	21	142	14.42	29.5829	150.51	19.1771	0.639583	8.09375
2021-04-18	0	1204	2021	4	18	Sunday	15	138	13.76	27.0256	73.6136	28.1184	0.75779	10.1381
2021-04-19	0	1205	2021	4	19	Monday	20	148	17.13	38.0208	91.4063	16.5729	0.864583	12.6875
2021-04-20	0	1206	2021	4	20	Tuesday	21	154	18.45	54.1354	91.6354	31.7812	1.13333	14.9583
2021-04-21	0	1207	2021	4	21	Wednesday	11	158	18.55	31.0371	58.1662	27.8872	1.00833	7.61141
2021-04-22	0	1208	2021	4	22	Thursday	17	140	19.33	41.3542	46.3958	16.3333	1.07292	6.29167
2021-04-23	0	1209	2021	4	23	Friday	13	124	18.26	39.6302	51.8958	16.5457	1.01042	6.95018
2021-04-24	0	1210	2021	4	24	Saturday	18	132	15.48	24.5729	48.1979	11.8125	0.841667	6.36458
2021-04-25	0	1211	2021	4	25	Sunday	19	155	17.28	45	64.9783	24.2591	0.983333	8.46377
2021-04-26	0	1212	2021	4	26	Monday	15	156	16.8	51.7518	56.3788	20.9339	1.02917	5.91667
2021-04-27	0	1213	2021	4	27	Tuesday	16	173	18.52	52.0729	132.042	18.6562	0.86875	8.26042
2021-04-28	0	1214	2021	4	28	Wednesday	11	156	17.75	39.7169	130.611	23.0909	0.772917	12.8302
2021-04-29	0	1215	2021	4	29	Thursday	24	123	20.62	36.1098	137.661	17.4991	0.727808	10.9212
2021-04-30	0	1216	2021	4	30	Friday	18	138	22.79	40.0095	121.098	35.2917	0.9125	13.2917
2021-05-01	1	1217	2021	5	1	Saturday	13	158	19.4	28.4375	69.6979	24.7887	0.816667	12.6979
2021-05-02	1	1218	2021	5	2	Sunday	16	147	17.87	14.519	55.5722	14.1907	0.699638	11.2246
2021-05-03	1	1219	2021	5	3	Monday	12	161	20.11	31.6875	61.9583	22.7604	0.910417	15.0104
2021-05-04	0	1220	2021	5	4	Tuesday	22	156	19.98	48.2292	111.198	22.4034	0.95625	8.78598
2021-05-05	0	1221	2021	5	5	Wednesday	17	156	20.68	44.5208	145.708	29.3646	0.858333	12.0938
2021-05-06	0	1222	2021	5	6	Thursday	32	168	20.87	37.628	125.601	10.2277	0.864881	11.5565
2021-05-07	0	1223	2021	5	7	Friday	15	152	20.4	179.26	632.174	12.0512	0.702083	8.54801
2021-05-08	0	1224	2021	5	8	Saturday	24	149	23.7	119.224	364.945	20.3972	0.88587	11.1458
2021-05-09	0	1225	2021	5	9	Sunday	22	166	26.02	52.3447	159.481	16.6458	1.12292	14.5729
2021-05-10	0	1226	2021	5	10	Monday	7	153	27.09	54.5188	133.425	26.2627	1.37228	16.7853
2021-05-11	0	1227	2021	5	11	Tuesday	16	146	20.55	29.8134	61.9195	17.6458	1.02292	9.32292
2021-05-12	0	1228	2021	5	12	Wednesday	20	167	21.99	49.4773	85.9186	19.2545	1.25833	11.7473
2021-05-13	0	1229	2021	5	13	Thursday	22	145	23.51	50.4233	72.4157	14.108	1.23	11.3551
2021-05-14	0	1230	2021	5	14	Friday	24	153	25.15	30.9375	46.3542	13.4991	1.09886	9.0625
2021-05-15	0	1231	2021	5	15	Saturday	15	130	26.48	31.1667	49.885	21	1.37708	8.6875
2021-05-16	0	1232	2021	5	16	Sunday	11	118	18.74	12.4826	24.3229	12.1812	0.789583	6.92708
2021-05-17	0	1233	2021	5	17	Monday	19	127	17.49	18.5611	40.9354	18.7835	0.808333	12.2998
2021-05-18	0	1234	2021	5	18	Tuesday	14	155	18.08	24.6607	50.7418	17.2604	0.85	9.92708
2021-05-19	0	1235	2021	5	19	Wednesday	21	150	18.13	49.1979	72.0521	17.214	1.02083	10.8963
2021-05-20	0	1236	2021	5	20	Thursday	12	175	19.43	31.0972	47.7263	11.7337	0.89529	10.5201
2021-05-21	0	1237	2021	5	21	Friday	18	162	22.14	30.8182	49.4981	12.2808	0.912689	10.0589
2021-05-22	0	1238	2021	5	22	Saturday	12	146	24.16	43.9781	69.7115	12.8125	1.18333	11.9167
2021-05-23	0	1239	2021	5	23	Sunday	21	139	22.17	37.9053	108.345	18.716	0.865217	9.4219
2021-05-24	0	1240	2021	5	24	Monday	16	141	22.12	46.524	168.135	27.4479	0.808333	10.6667
2021-05-25	0	1241	2021	5	25	Tuesday	16	154	23.15	35.2348	130.604	14.5085	0.714583	10.0312
2021-05-26	0	1242	2021	5	26	Wednesday	17	136	19.53	22.8193	70.4155	10.0263	0.760417	8.35236
2021-05-27	0	1243	2021	5	27	Thursday	18	186	22.25	34.8229	96.4271	19.7386	0.902083	11.0938
2021-05-28	0	1244	2021	5	28	Friday	18	167	23.77	17.7247	70.6012	15.168	0.616667	8.98234
2021-05-29	0	1245	2021	5	29	Saturday	7	205	24.53	31.6828	95.5597	15.5701	0.78125	11.7415
2021-05-30	0	1246	2021	5	30	Sunday	24	172	25.43	50.5414	112.912	22.4429	1.15625	12.4837
2021-05-31	0	1247	2021	5	31	Monday	26	179	26.94	46.4186	92.0445	17.4464	1.09375	9.94413
2021-06-01	0	1248	2021	6	1	Tuesday	21	163	27.26	51.7197	107.292	17.3987	1.21667	9.95833
2021-06-02	0	1249	2021	6	2	Wednesday	23	170	27.23	31.6291	72.3498	10.5784	0.897917	7.98551
2021-06-03	0	1250	2021	6	3	Thursday	21	148	23.6	31.8089	50.4861	14.6979	0.820833	7.07292
2021-06-04	0	1251	2021	6	4	Friday	15	156	22.84	27.4148	69.3475	28.1398	0.787154	11.4446
2021-06-05	0	1252	2021	6	5	Saturday	8	192	25.33	27.5165	82.5987	21.0431	0.671212	13.2057
2021-06-06	0	1253	2021	6	6	Sunday	16	125	26.12	26.3333	71.2292	22.3832	0.729167	11.7604
2021-06-07	0	1254	2021	6	7	Monday	12	172	27.18	29.8144	90.6612	17.4004	0.702083	10.3333
2021-06-08	0	1255	2021	6	8	Tuesday	19	168	27.43	29.3453	81.9907	21.2795	0.686858	12.0765
2021-06-09	0	1256	2021	6	9	Wednesday	17	148	28.33	32.9559	68.9577	15.918	0.811688	9.9593
2021-06-10	0	1257	2021	6	10	Thursday	25	164	27.99	48.4832	72.6784	15.6354	1.0553	8.55208
2021-06-11	0	1258	2021	6	11	Friday	18	162	28.68	37.5797	58.3411	16.214	0.933333	7.83812
2021-06-12	1	1259	2021	6	12	Saturday	14	174	28.36	38.5743	85.3166	13.6354	0.95625	11.0729
2021-06-13	1	1260	2021	6	13	Sunday	14	160	27.48	28.6771	70.7604	10.5163	0.902083	8.89583
2021-06-14	1	1261	2021	6	14	Monday	22	143	29.93	19.9375	29.0729	7.73958	0.98125	6.375
2021-06-15	0	1262	2021	6	15	Tuesday	23	184	29.64	20.2344	30.4636	5.07292	1.01667	6.4375
2021-06-16	0	1263	2021	6	16	Wednesday	16	224	26.88	10.8745	24.0091	4.65625	0.708333	6.28409
2021-06-17	0	1264	2021	6	17	Thursday	21	131	26.8	18.3946	27.7917	10.0521	0.770833	6.54261
2021-06-18	0	1265	2021	6	18	Friday	8	177	23.8	23.2054	43.2677	15.9595	0.785688	9.64266
2021-06-19	0	1266	2021	6	19	Saturday	11	153	23.26	19.054	44.9018	15.2528	0.655871	9.59077
2021-06-20	0	1267	2021	6	20	Sunday	22	142	24.57	16.6196	46.8043	13.9565	0.663043	10.6413
2021-06-21	0	1268	2021	6	21	Monday	15	161	26.34	23.0729	60.6979	17.9896	0.76875	12.2396
2021-06-22	0	1269	2021	6	22	Tuesday	14	157	26.65	37.8021	74.2217	19.8655	0.914583	11.2083
2021-06-23	0	1270	2021	6	23	Wednesday	18	147	26.43	33.5919	67.8216	16.0303	0.91875	12.4511
2021-06-24	0	1271	2021	6	24	Thursday	21	136	27.66	26.5	61.1562	14.1	0.841667	13.5938
2021-06-25	0	1272	2021	6	25	Friday	8	147	26.66	36.6696	62.0231	17.8624	0.939583	12.7614
2021-06-26	0	1273	2021	6	26	Saturday	10	116	25.79	31.7055	43.865	9.34218	0.778261	9.07609
2021-06-27	0	1274	2021	6	27	Sunday	12	142	26.62	48.2258	67.7065	12.2686	0.845833	8.9375
2021-06-28	0	1275	2021	6	28	Monday	18	130	28.12	40.8103	60.6354	16.2174	0.80625	10.1458
2021-06-29	0	1276	2021	6	29	Tuesday	17	131	28.54	22.8229	35.2188	9.44792	0.697917	7.78125
2021-06-30	0	1277	2021	6	30	Wednesday	15	156	28.8	36.4261	57.7613	11.0331	0.833333	8.625
2021-07-01	0	1278	2021	7	1	Thursday	22	155	28.26	18.5912	33.2269	10.8438	0.652083	8.29529
2021-07-02	0	1279	2021	7	2	Friday	25	139	27.08	25.0901	41.9132	12.9375	0.702083	7.39773
2021-07-03	0	1280	2021	7	3	Saturday	10	129	27.24	16.4375	31.2812	10.4896	0.633333	6.84375
2021-07-04	0	1281	2021	7	4	Sunday	20	170	26.36	31.5104	53.5833	21.7292	0.710417	7.77083
2021-07-05	0	1282	2021	7	5	Monday	18	154	27.51	31.2292	48.3646	10.375	0.664583	7.22917
2021-07-06	0	1283	2021	7	6	Tuesday	24	175	28.71	32.375	51.1834	12.3854	0.695833	8.13542
2021-07-07	0	1284	2021	7	7	Wednesday	13	119	28.35	41.9167	51.4375	14.7309	1.0125	7.24074
2021-07-08	0	1285	2021	7	8	Thursday	10	121	27.55	15.8194	35.8545	11.3611	0.770833	6.81944
2021-07-09	0	1286	2021	7	9	Friday	18	154	28.29	22.7611	38.2857	9.36759	0.736364	6.88374
2021-07-10	0	1287	2021	7	10	Saturday	9	142	29.21	17.1843	35.1278	7.80429	0.65163	7.15366
2021-07-11	0	1288	2021	7	11	Sunday	16	154	29.03	24.3125	44	10.125	0.722917	6.11458
2021-07-12	0	1289	2021	7	12	Monday	12	172	29.26	19.8745	40.7917	5.85417	0.577083	6.32609
2021-07-13	0	1290	2021	7	13	Tuesday	16	145	29.56	17.0833	35.6667	6.64583	0.575	6.55208
2021-07-14	0	1291	2021	7	14	Wednesday	17	164	29.53	23.3579	46.0753	7.52083	0.595833	6.27708
2021-07-15	0	1292	2021	7	15	Thursday	19	151	29.55	17.3512	26.1156	7.49369	0.554167	7.43025
2021-07-16	0	1293	2021	7	16	Friday	15	199	29.25	11.4542	23.3972	8.61187	0.552083	6.74049
2021-07-17	0	1294	2021	7	17	Saturday	15	125	26.9	10.2758	22.9062	10.0498	0.510417	6.66667
2021-07-18	0	1295	2021	7	18	Sunday	7	124	25.88	15.3854	32.8542	12.2188	0.495833	7.03125
2021-07-19	0	1296	2021	7	19	Monday	21	130	27.64	17.4271	37.8958	11.7917	0.529167	7.54167
2021-07-20	0	1297	2021	7	20	Tuesday	11	163	28.03	15.9733	37.736	16.2188	0.535417	7.26042
2021-07-21	0	1298	2021	7	21	Wednesday	7	144	27.41	12.3225	33.1875	10.6766	0.470833	7.12681
2021-07-22	0	1299	2021	7	22	Thursday	19	168	27.33	17.375	35.6771	12.7083	0.527083	7.34375
2021-07-23	0	1300	2021	7	23	Friday	10	127	27.55	18.9326	39.2028	17.4411	0.622036	8.01408
2021-07-24	0	1301	2021	7	24	Saturday	13	117	27.13	14.4688	36.7604	16.3197	0.688043	8.46241
2021-07-25	0	1302	2021	7	25	Sunday	17	160	26.49	14.1196	37.3913	15.8043	0.715217	9.11957
2021-07-26	0	1303	2021	7	26	Monday	15	156	27.28	11.4064	37.495	14.5625	0.616667	8.125
2021-07-27	0	1304	2021	7	27	Tuesday	16	190	26.46	7.03662	23.3125	11.8542	0.545833	7.52083
2021-07-28	0	1305	2021	7	28	Wednesday	12	105	25.9	10.1462	16.9986	7.78125	0.560417	6.91893
2021-07-29	0	1306	2021	7	29	Thursday	8	122	25.85	4.29167	8.69444	6.36706	0.520833	5.84722
2021-07-30	0	1307	2021	7	30	Friday	17	144	27.9	15.3889	26.5556	7.48611	0.570833	6.66667
2021-07-31	0	1308	2021	7	31	Saturday	11	154	29.63	28.8755	50.5205	13.4895	0.804348	6.6093
2021-08-01	0	1309	2021	8	1	Sunday	18	135	29.85	23.7444	52.2525	11.0639	0.735	6.36944
2021-08-02	0	1310	2021	8	2	Monday	23	143	29.38	22	39.8958	14.6875	0.9	8.79167
2021-08-03	0	1311	2021	8	3	Tuesday	10	149	28.69	30.3913	54.8696	21.5217	0.7	6.8913
2021-08-04	0	1312	2021	8	4	Wednesday	23	149	28.66	20.6522	38.6812	12.9348	0.804348	7.8083
2021-08-05	0	1313	2021	8	5	Thursday	9	147	28.44	15.0222	31.9877	13.6607	0.763636	7.82937
2021-08-06	0	1314	2021	8	6	Friday	15	198	28.77	18.3889	39.875	18.9583	0.866667	7.45833
2021-08-07	0	1315	2021	8	7	Saturday	15	140	27.83	20.5938	43.4688	16.3782	0.741214	8.85236
2021-08-08	0	1316	2021	8	8	Sunday	13	134	28.58	42.6146	66.2758	24.7799	0.995833	7.50136
2021-08-09	0	1317	2021	8	9	Monday	16	148	27.6	58.1772	95.6171	36.9987	1.01	6.0426
2021-08-10	0	1318	2021	8	10	Tuesday	14	176	27.28	32	53	5	0.7	16
2021-08-11	0	1319	2021	8	11	Wednesday	13	168	27.37	47.5729	72.6042	20.0104	0.86875	5.36111
2021-08-12	0	1320	2021	8	12	Thursday	17	140	26.33	36.9508	66.4303	22.2074	0.814583	6.22672
2021-08-13	0	1321	2021	8	13	Friday	7	151	23.31	39.6146	59.0729	22.7188	0.795833	4.95833
2021-08-14	0	1322	2021	8	14	Saturday	19	137	23.92	28.9515	49.2391	22.9524	0.754529	6.30978
2021-08-15	0	1323	2021	8	15	Sunday	16	151	24.03	28.5938	56.9271	23.6875	0.702083	9.17708
2021-08-16	0	1324	2021	8	16	Monday	9	124	25.55	25.8168	50.5385	19.337	0.647826	5.90217
2021-08-17	0	1325	2021	8	17	Tuesday	18	165	26.37	28.8333	55.5964	23.9524	0.721429	5.34524
2021-08-18	0	1326	2021	8	18	Wednesday	16	117	26.79	32.011	56.8012	22	0.723684	5.35746
2021-08-19	0	1327	2021	8	19	Thursday	14	138	26.68	27.9375	58.3542	25.5521	0.660417	6.47917
2021-08-20	0	1328	2021	8	20	Friday	14	125	26.51	18.3513	28.904	11.6943	0.738068	4.18161
2021-08-21	0	1329	2021	8	21	Saturday	8	141	26.26	29.7059	40.7206	17.0735	0.835294	5.79412
2021-08-22	0	1330	2021	8	22	Sunday	12	112	26.82	31.4774	49.0909	13.5236	0.872011	5.69882
2021-08-23	0	1331	2021	8	23	Monday	14	146	27.54	15.2787	26.5227	14.1984	0.6375	4.42754
2021-08-24	0	1332	2021	8	24	Tuesday	8	143	24.23	28.2899	54.5786	16.3804	0.7	8.02174
2021-08-25	0	1333	2021	8	25	Wednesday	14	146	25.48	25.5625	69.5312	20.9715	0.633333	8.1798
2021-08-26	0	1334	2021	8	26	Thursday	23	127	25.39	20.053	60.3214	25.8036	0.545238	6.02801
2021-08-27	0	1335	2021	8	27	Friday	10	118	23.61	13.6354	28.5802	12.2274	0.457156	4.27174
2021-08-28	0	1336	2021	8	28	Saturday	10	115	25.55	24.1021	40.7535	18.5127	0.650906	5.2423
2021-08-29	0	1337	2021	8	29	Sunday	19	114	26.48	12.236	18.8125	14.2083	0.59375	3.22917
2021-08-30	0	1338	2021	8	30	Monday	19	118	28.18	11.3458	18.3954	15.5208	0.70625	3.17519
2021-08-31	0	1339	2021	8	31	Tuesday	22	133	28.98	14.1418	22.8021	14.2917	0.7875	3.45833
2021-09-01	0	1340	2021	9	1	Wednesday	20	128	28.05	11.9432	19.3684	13.5333	0.633333	3.29261
2021-09-02	0	1341	2021	9	2	Thursday	16	115	25.6	16.8895	25.1714	13.4271	0.652083	3.59692
2021-09-03	0	1342	2021	9	3	Friday	15	188	26.45	27.3276	37.6911	21.048	0.996649	3.88179
2021-09-04	0	1343	2021	9	4	Saturday	24	101	27.17	20.6744	32.2853	14.8361	0.664583	5.53788
2021-09-05	0	1344	2021	9	5	Sunday	11	115	25.36	9.96686	18.1637	11.0265	0.654982	4.55019
2021-09-06	0	1345	2021	9	6	Monday	15	144	24.28	9.94565	21.5435	12.663	0.602174	5.21791
2021-09-07	0	1346	2021	9	7	Tuesday	25	128	23.33	14.2207	31.6742	19.7708	0.542045	6
2021-09-08	0	1347	2021	9	8	Wednesday	17	132	24.79	15.1259	38.5275	22.3841	0.509524	7.19186
2021-09-09	0	1348	2021	9	9	Thursday	19	127	26.21	22.2677	47.8011	18.8373	0.6375	8.24728
2021-09-10	0	1349	2021	9	10	Friday	28	117	26.92	31.6577	58.8233	16.1212	0.801705	8.05492
2021-09-11	0	1350	2021	9	11	Saturday	14	114	26.42	37.1386	62.6705	13.7955	0.875	7.97727
2021-09-12	0	1351	2021	9	12	Sunday	16	94	25.87	42	76.5994	19.1548	0.835714	7.4881
2021-09-13	0	1352	2021	9	13	Monday	28	100	25.24	20.9688	51.9271	18.4352	0.689583	7.14583
2021-09-14	0	1353	2021	9	14	Tuesday	24	122	24.16	31.3665	66.1979	24.9271	0.729167	7.17708
2021-09-15	0	1354	2021	9	15	Wednesday	17	143	24.65	23.9873	55.1227	24.0318	0.827083	8.73864
2021-09-16	0	1355	2021	9	16	Thursday	19	111	24.19	33.048	75.5752	32.8918	0.791395	9.52174
2021-09-17	0	1356	2021	9	17	Friday	11	117	24.05	36.4787	66.0009	20.6716	0.94375	7.87027
2021-09-18	0	1357	2021	9	18	Saturday	8	124	24.74	26.4479	49.3542	28.4896	0.814583	5.92708
2021-09-19	0	1358	2021	9	19	Sunday	17	100	26.12	22.4561	36.0417	19.2083	0.695833	5.26042
2021-09-20	0	1359	2021	9	20	Monday	7	102	21.44	5.83524	16.0607	11.9583	0.647917	5.15625
2021-09-21	1	1360	2021	9	21	Tuesday	7	108	24.21	21.0104	47.6354	20.6667	0.672917	8.40625
2021-09-22	0	1361	2021	9	22	Wednesday	23	141	26.26	32.0145	73.255	24.4216	0.754167	9.44339
2021-09-23	0	1362	2021	9	23	Thursday	15	134	25.82	33.3958	72.3854	18.4583	0.85	9.64583
2021-09-24	0	1363	2021	9	24	Friday	18	162	26.16	23.0276	54.7061	15.736	0.698732	6.80616
2021-09-25	0	1364	2021	9	25	Saturday	10	110	27.25	7.09111	21.0648	12.5947	0.477989	5.23143
2021-09-26	0	1365	2021	9	26	Sunday	23	106	27.44	8.59964	20.2689	14.6146	0.554167	5
2021-09-27	0	1366	2021	9	27	Monday	16	114	24.88	15.9792	29.0494	14.4062	0.65625	5.32292
2021-09-28	0	1367	2021	9	28	Tuesday	19	124	24.54	24.8021	36.7435	29.25	0.75625	6.9375
2021-09-29	0	1368	2021	9	29	Wednesday	16	112	22.52	17.4959	33.8795	26.2708	0.689583	7.32473
2021-09-30	0	1369	2021	9	30	Thursday	8	94	23.01	19.8475	47.0833	24.0965	0.641667	7.9529
2021-10-01	1	1370	2021	10	1	Friday	18	93	24.42	35.3913	67.1476	20.1897	0.765711	10.294
2021-10-02	1	1371	2021	10	2	Saturday	19	128	25.62	53.2083	92.5833	23.75	0.958333	10.1875
2021-10-03	1	1372	2021	10	3	Sunday	15	117	27.32	41.2565	73.1542	17.9917	0.853095	10.5726
2021-10-04	1	1373	2021	10	4	Monday	14	109	28.49	18.4232	42.494	17.4048	0.785714	6.6342
2021-10-05	1	1374	2021	10	5	Tuesday	13	117	26.16	9.02828	20.9167	17.0729	0.570833	5.1875
2021-10-06	1	1375	2021	10	6	Wednesday	16	117	23.94	13.3056	27.6528	19.2083	0.655556	5.86111
2021-10-07	1	1376	2021	10	7	Thursday	15	102	20.01	12.2961	17.3958	22.4502	0.783333	5.27491
2021-10-08	0	1377	2021	10	8	Friday	16	135	20.76	35.3248	38.5032	27.4719	0.957156	6.00861
2021-10-09	0	1378	2021	10	9	Saturday	10	124	22.71	45.589	53.9451	25.276	0.92971	7.22003
2021-10-10	0	1379	2021	10	10	Sunday	13	122	18.94	24.0141	41.7604	23.5312	0.639583	6.9375
2021-10-11	0	1380	2021	10	11	Monday	16	89	16.06	10.5966	36.4167	30.3021	0.48125	8.26042
2021-10-12	0	1381	2021	10	12	Tuesday	13	122	17.3	18.7708	47.3646	34.6458	0.570833	12.1562
2021-10-13	0	1382	2021	10	13	Wednesday	29	126	19.66	43.8564	81.9991	57.0625	0.860417	10.9819
2021-10-14	0	1383	2021	10	14	Thursday	22	118	22.19	63.9375	93.3863	49.8075	0.93125	11.101
2021-10-15	0	1384	2021	10	15	Friday	23	98	17.48	58.1064	59.2074	28.4103	0.9875	6.49094
2021-10-16	0	1385	2021	10	16	Saturday	19	99	14.1	18.2784	43.5017	21.4604	0.458333	6.94388
2021-10-17	0	1386	2021	10	17	Sunday	17	129	10.59	14.2604	40.1723	33.7917	0.40625	10.3646
2021-10-18	0	1387	2021	10	18	Monday	24	144	13.5	27.7704	54.1648	36.3958	0.510417	8.57481
2021-10-19	0	1388	2021	10	19	Tuesday	14	106	12.73	43.2039	80.7355	47.3987	0.69375	8.55208
2021-10-20	0	1389	2021	10	20	Wednesday	20	137	10.98	36.971	71.3211	43.5054	0.558333	10.6155
2021-10-21	0	1390	2021	10	21	Thursday	25	135	11.31	83.0104	96.5786	36.7604	0.7125	6.04167
2021-10-22	0	1391	2021	10	22	Friday	17	95	12.5	83.869	116.312	47.5795	0.767614	10.6473
2021-10-23	0	1392	2021	10	23	Saturday	20	117	12.79	39.2917	73.5208	50.8021	0.635417	9.28125
2021-10-24	0	1393	2021	10	24	Sunday	12	94	14.55	72.1324	110.648	59.4461	0.876993	12.6154
2021-10-25	0	1394	2021	10	25	Monday	13	106	14.67	89.8637	114.864	50.0312	0.614583	9.91667
2021-10-26	0	1395	2021	10	26	Tuesday	15	101	15.9	95.9345	131.251	60.631	0.854762	11.5833
2021-10-27	0	1396	2021	10	27	Wednesday	23	114	16.73	96.3646	132.167	64.5729	0.865417	11.6771
2021-10-28	0	1397	2021	10	28	Thursday	25	134	16.12	83.1667	126.919	57.3884	0.813859	12.3175
2021-10-29	0	1398	2021	10	29	Friday	17	125	16.26	73.7723	107.92	43.6658	0.665308	12.6001
2021-10-30	0	1399	2021	10	30	Saturday	18	117	17.89	101.763	133.37	43.8804	0.791304	11.8804
2021-10-31	0	1400	2021	10	31	Sunday	20	106	16.82	130.495	162.518	45.1499	0.945924	14.0632
2021-11-01	0	1401	2021	11	1	Monday	22	132	16.9	95.3542	129.615	39.4688	0.864583	7.77083
2021-11-02	0	1402	2021	11	2	Tuesday	18	123	16.44	57.9479	90.4957	40.0833	0.691667	12.1562
2021-11-03	0	1403	2021	11	3	Wednesday	24	115	17.03	114.642	145.59	53.0701	0.96875	9.80707
2021-11-04	0	1404	2021	11	4	Thursday	14	113	17.03	138.971	172.479	51.0729	1.03333	11.5625
2021-11-05	0	1405	2021	11	5	Friday	10	119	18.18	73.8021	101.917	32.7917	0.791667	8.83333
2021-11-06	0	1406	2021	11	6	Saturday	22	139	18.3	17.7765	27.0226	25.5521	0.599638	5.02717
2021-11-07	0	1407	2021	11	7	Sunday	18	85	7.54	12.2689	22.459	16.5996	0.337862	4.99366
2021-11-08	0	1408	2021	11	8	Monday	19	118	4.12	15.0978	36.0892	28.7917	0.36875	8.3433
2021-11-09	0	1409	2021	11	9	Tuesday	22	111	6.29	25.8021	59.875	50.9724	0.572917	14.0317
2021-11-10	0	1410	2021	11	10	Wednesday	27	118	7.73	27.8577	56.3342	48.7576	0.512772	14.1141
2021-11-11	0	1411	2021	11	11	Thursday	18	108	9.41	20.8774	50.5091	39.3555	0.394837	13.9928
2021-11-12	0	1412	2021	11	12	Friday	17	127	11.16	37.6621	75.2361	57.3542	0.616667	11.5865
2021-11-13	0	1413	2021	11	13	Saturday	22	75	10.85	70.5625	129.01	64.5521	0.75625	16.3646
2021-11-14	0	1414	2021	11	14	Sunday	17	82	12.31	80.3333	147.323	61.0729	0.839583	16.1562
2021-11-15	0	1415	2021	11	15	Monday	19	129	14.6	97.5625	151.382	69.6798	0.977083	22.0457
2021-11-16	0	1416	2021	11	16	Tuesday	22	133	14.16	142.506	203.729	78.0417	1.44167	21.8768
2021-11-17	0	1417	2021	11	17	Wednesday	22	108	12.73	133.791	176.323	47.4986	1.0875	14.2812
2021-11-18	0	1418	2021	11	18	Thursday	21	127	12.71	128.167	159.938	28.3379	0.758333	12.9805
2021-11-19	0	1419	2021	11	19	Friday	9	101	12.62	103.129	134.333	44.1979	0.96875	13.6282
2021-11-20	0	1420	2021	11	20	Saturday	18	126	14.3	110.26	160.833	51.3854	1.175	10.875
2021-11-21	0	1421	2021	11	21	Sunday	18	97	10.47	34.1562	76.8021	26.6667	0.6	6.27083
2021-11-22	0	1422	2021	11	22	Monday	16	142	4.36	10.2443	89.0925	22.9909	0.229167	7.8447
2021-11-23	0	1423	2021	11	23	Tuesday	18	126	5.2	32.3125	80.9583	44.6042	0.44375	11.6979
2021-11-24	0	1424	2021	11	24	Wednesday	19	126	8.25	56.5994	118.532	54.1798	0.660417	14.2373
2021-11-25	0	1425	2021	11	25	Thursday	21	100	9.45	82.5445	160.521	73.0625	1.05833	13.2292
2021-11-26	0	1426	2021	11	26	Friday	36	94	8.8	89.4564	161.452	70.9583	1.09583	16.0938
2021-11-27	0	1427	2021	11	27	Saturday	24	103	8.91	98.6165	160.983	52.3352	1.02871	20.1091
2021-11-28	0	1428	2021	11	28	Sunday	19	117	11.51	33.2812	73.1875	36.625	0.602083	10.8125
2021-11-29	0	1429	2021	11	29	Monday	20	115	10.62	59.3854	98.4518	53.1146	0.866667	9.33333
2021-11-30	0	1430	2021	11	30	Tuesday	20	125	6.42	35.0287	45.0191	20.7115	0.415415	6.05952
2021-12-01	0	1431	2021	12	1	Wednesday	17	104	3.07	21.4701	52.2178	44.5026	0.49375	11.6159
2021-12-02	0	1432	2021	12	2	Thursday	19	114	4.91	39.7875	76.45	49.7875	0.575	12.8875
2021-12-03	0	1433	2021	12	3	Friday	13	127	5.63	42.8801	95.9271	56.619	0.708333	14.4943
2021-12-04	0	1434	2021	12	4	Saturday	23	100	7.8	55.2811	106.302	53.8562	0.670356	15.0316
2021-12-05	0	1435	2021	12	5	Sunday	15	94	8.16	70.7477	118.307	54.6439	0.756439	19.9982
2021-12-06	0	1436	2021	12	6	Monday	19	163	8.56	90.1932	143.409	56.4717	0.946998	17.2717
2021-12-07	0	1437	2021	12	7	Tuesday	27	99	7.61	25.3393	61.6861	38.4275	0.558117	10.4625
2021-12-08	0	1438	2021	12	8	Wednesday	15	98	8.83	37.0951	79.2231	46.161	0.720076	13.3694
2021-12-09	0	1439	2021	12	9	Thursday	21	130	9.34	70.6502	107.046	53.108	0.839583	14.3207
2021-12-10	0	1440	2021	12	10	Friday	21	94	9.54	134.581	181.73	68.8996	1.15114	11.2481
2021-12-11	0	1441	2021	12	11	Saturday	10	90	8.03	113.631	162.169	67.6303	1.08934	12.7979
2021-12-12	0	1442	2021	12	12	Sunday	24	82	7.08	44.9611	74.7083	32.3125	0.602083	8.71875
2021-12-13	0	1443	2021	12	13	Monday	12	100	4.45	33.9896	66.0625	42.7917	0.654167	13.2812
2021-12-14	0	1444	2021	12	14	Tuesday	13	74	8.03	89.6979	112.521	34.7708	0.770833	9.02083
2021-12-15	0	1445	2021	12	15	Wednesday	10	103	10.9	120.562	141.49	40.9062	1.15	10.2292
2021-12-16	0	1446	2021	12	16	Thursday	16	95	8.95	114.24	150.396	42.8869	1.12708	11.4792
2021-12-17	0	1447	2021	12	17	Friday	14	91	3.07	13.2453	55.1667	29.6979	0.45625	11.25
2021-12-18	0	1448	2021	12	18	Saturday	9	110	1.12	29.0104	64.1771	40.4167	0.533333	11.1354
2021-12-19	0	1449	2021	12	19	Sunday	20	95	5.48	54.3646	106.156	49.5	0.689583	13.7083
2021-12-20	0	1450	2021	12	20	Monday	10	108	8.18	55.6106	95.8021	44.6617	0.673732	12.2917
2021-12-21	0	1451	2021	12	21	Tuesday	13	137	8.95	94.1862	141.87	61.0842	1.1577	20.0255
2021-12-22	0	1452	2021	12	22	Wednesday	24	78	9.01	116.597	166.709	61.3066	1.23958	20.6653
2021-12-23	0	1453	2021	12	23	Thursday	26	199	7.13	147.646	186.799	54.9565	1.48179	10.3569
2021-12-24	0	1454	2021	12	24	Friday	12	92	3.6	37.732	66.1998	19.9375	0.552083	6.69792
2021-12-25	0	1455	2021	12	25	Saturday	13	111	-2.7	13.8542	33.1042	20.0312	0.314583	7.625
2021-12-26	0	1456	2021	12	26	Sunday	15	93	-2.89	23.2917	44.4896	35.4742	0.44375	12.2083
2021-12-27	0	1457	2021	12	27	Monday	6	151	-0.77	60.214	91.5625	49.6779	0.666667	12.3438
2021-12-28	0	1458	2021	12	28	Tuesday	9	89	1.46	61.9612	88.6686	42.3034	0.628442	12.8329
2021-12-29	0	1459	2021	12	29	Wednesday	13	84	2.62	66.6919	106.718	57.7045	0.909091	18.2208
2021-12-30	0	1460	2021	12	30	Thursday	10	104	2.58	68.9742	112.798	67.623	1.125	22.9861
2021-12-31	0	1461	2021	12	31	Friday	27	82	3.37	88.0312	139.156	68.2708	1.34167	24.5
2022-01-01	1	1462	2022	1	1	Saturday	29	121	3.63	79.1185	115.082	55.6906	1.08125	17.9043
2022-01-02	1	1463	2022	1	2	Sunday	19	146	3.94	70.75	113.108	56.775	1.06667	19.125
2022-01-03	1	1464	2022	1	3	Monday	36	124	5.04	94.3818	136.943	47.8098	1.0923	17.6688
2022-01-04	0	1465	2022	1	4	Tuesday	22	141	5.56	140.747	188.775	65.3917	1.50625	15.9659
2022-01-05	0	1466	2022	1	5	Wednesday	23	154	2.37	44.3692	57.7167	35.212	0.73125	7.48551
2022-01-06	0	1467	2022	1	6	Thursday	25	140	3.17	102.136	117.108	45.6417	1.18016	11.9601
2022-01-07	0	1468	2022	1	7	Friday	15	142	3.39	100.317	117.642	46.3833	1.05833	10.9667
2022-01-08	0	1469	2022	1	8	Saturday	14	147	3.47	113.933	130.742	37.8083	1.05958	10.2167
2022-01-09	0	1470	2022	1	9	Sunday	11	129	4.55	138.125	157.458	47.975	1.20923	11.0833
2022-01-10	0	1471	2022	1	10	Monday	15	170	3.73	162.992	184.117	54.8083	1.41875	10.228
2022-01-11	0	1472	2022	1	11	Tuesday	21	143	3.22	84.4311	96.7289	35.8775	1.04937	10.1243
2022-01-12	0	1473	2022	1	12	Wednesday	31	133	3.53	144.28	165.301	46.9967	1.2913	10.5576
2022-01-13	0	1474	2022	1	13	Thursday	9	136	0.25	62.2051	88.0399	43.9583	0.860417	11.567
2022-01-14	0	1475	2022	1	14	Friday	15	126	-0.48	51.8788	81.0333	46.85	0.804167	12.6917
2022-01-15	0	1476	2022	1	15	Saturday	21	104	5.05	82.5917	106.15	47.425	0.997917	11.6833
2022-01-16	0	1477	2022	1	16	Sunday	21	124	5.98	65.675	106.108	49.65	1.0375	16.675
2022-01-17	0	1478	2022	1	17	Monday	10	123	5.69	106.61	148.246	59.1357	1.20833	19.6029
2022-01-18	0	1479	2022	1	18	Tuesday	23	143	4.98	110.403	145.479	49.3127	1.25457	15.6496
2022-01-19	0	1480	2022	1	19	Wednesday	21	137	5.51	126.848	161.513	42.5822	0.923674	12.4054
2022-01-20	0	1481	2022	1	20	Thursday	15	115	4.51	56.9333	81.4917	35.3274	0.6	8.3369
2022-01-21	0	1482	2022	1	21	Friday	14	110	3.12	47.2955	74.425	36.5801	0.702083	11.0083
2022-01-22	0	1483	2022	1	22	Saturday	19	122	4.76	52.5098	63.9065	34.2167	0.745833	7.1
2022-01-23	0	1484	2022	1	23	Sunday	17	93	4.9	95.1083	105.875	35.15	1.15	8.38333
2022-01-24	0	1485	2022	1	24	Monday	17	138	2.98	64.017	81.2667	25.2996	0.779167	10.9833
2022-01-25	0	1486	2022	1	25	Tuesday	20	137	3.78	103.259	117.937	31.4471	1.07962	12.4275
2022-01-26	0	1487	2022	1	26	Wednesday	10	102	2.76	109.443	133.404	38.5685	1.23306	11.2101
2022-01-27	0	1488	2022	1	27	Thursday	21	104	3.61	59.6	78.775	31.8192	0.910417	14.45
2022-01-28	0	1489	2022	1	28	Friday	12	112	1.62	76.3243	97.4	34.85	0.94375	16.4899
2022-01-29	0	1490	2022	1	29	Saturday	11	80	1.31	93.6167	113.916	34.2833	1.225	18.7167
2022-01-30	0	1491	2022	1	30	Sunday	9	87	2.27	101.542	116.25	22.9	1.0375	13.3
2022-01-31	1	1492	2022	1	31	Monday	9	61	2.77	58.6917	99.1833	11.375	0.633333	8.26667
2022-02-01	1	1493	2022	2	1	Tuesday	13	65	2.3	29.3764	53.1221	13.7083	0.420833	14.325
2022-02-02	1	1494	2022	2	2	Wednesday	25	124	1.65	33.1178	52.0208	14.7264	0.620833	16.4609
2022-02-03	1	1495	2022	2	3	Thursday	13	122	1.5	56.0333	81.2417	18.7906	0.69375	14.9652
2022-02-04	1	1496	2022	2	4	Friday	9	106	2.89	60.1535	85.3943	16.0711	0.679167	13.5965
2022-02-05	1	1497	2022	2	5	Saturday	12	133	1.73	18.2197	36.4196	14.0971	0.433333	12.7167
2022-02-06	1	1498	2022	2	6	Sunday	14	145	2.13	29.475	48.7417	22.1917	0.570833	14.5
2022-02-07	0	1499	2022	2	7	Monday	29	203	-0.14	39.1417	58.275	28.2083	0.614583	16
2022-02-08	0	1500	2022	2	8	Tuesday	27	180	0.87	52.5083	70.8167	19.8917	0.6	10.0333
2022-02-09	0	1501	2022	2	9	Wednesday	180	198	2.13	51.675	69.05	22.8333	0.6	10.2583
2022-02-10	0	1502	2022	2	10	Thursday	14	160	2.93	45.1087	54.0221	18.4083	0.597826	7.37138
2022-02-11	0	1503	2022	2	11	Friday	17	139	3.75	56.2085	66.7236	32.2709	0.754348	9.32609
2022-02-12	0	1504	2022	2	12	Saturday	18	160	4.37	69.8083	79.825	27.7	0.739583	10.5417
2022-02-13	0	1505	2022	2	13	Sunday	11	132	5.44	105.442	121.208	39.1417	0.958333	10.7083
2022-02-14	0	1506	2022	2	14	Monday	15	164	5.41	70.6333	102.617	20.6	0.666667	8.06667
2022-02-15	0	1507	2022	2	15	Tuesday	23	144	5.51	50.4083	66.9	16.8333	0.629167	9.86667
2022-02-16	0	1508	2022	2	16	Wednesday	36	176	4.8	87.0083	117.35	23.1333	0.741667	8.98333
2022-02-17	0	1509	2022	2	17	Thursday	22	172	0.71	29.4773	47.6679	17.7333	0.433333	9.94384
2022-02-18	0	1510	2022	2	18	Friday	19	140	1.69	24.2011	42.2656	16.9985	0.445109	7.74529
2022-02-19	0	1511	2022	2	19	Saturday	22	197	0.82	26.4767	52.9177	21.6166	0.409091	9.06047
2022-02-20	0	1512	2022	2	20	Sunday	17	225	0.69	38.587	61.8853	35.887	0.55	10.6696
2022-02-21	0	1513	2022	2	21	Monday	22	163	3.01	46.887	68.7272	25.5826	0.547826	10.3565
2022-02-22	0	1514	2022	2	22	Tuesday	10	144	3.62	34.5602	63.0373	37.0791	0.652174	14.1209
2022-02-23	0	1515	2022	2	23	Wednesday	17	154	4.04	31.1667	56.225	31.3667	0.60625	13.075
2022-02-24	0	1516	2022	2	24	Thursday	15	153	3.9	60.9083	85.0174	34.475	0.720833	14.0656
2022-02-25	0	1517	2022	2	25	Friday	19	150	6.73	68.3227	87.2069	26.5616	0.736775	11.4649
2022-02-26	0	1518	2022	2	26	Saturday	15	142	7.76	39.3607	73.6964	25.3837	0.583333	9.7942
2022-02-27	0	1519	2022	2	27	Sunday	15	139	7.54	35.7455	77.2061	36.1083	0.629167	14.3083
2022-02-28	0	1520	2022	2	28	Monday	14	113	12.51	78.0708	113.739	36.9217	0.893478	18.1826
2022-03-01	0	1521	2022	3	1	Tuesday	17	219	9.97	31.6583	75.4	26.425	0.53125	10.375
2022-03-02	0	1522	2022	3	2	Wednesday	14	184	10.48	31.733	78.5659	41.5953	0.566667	11.6098
2022-03-03	0	1523	2022	3	3	Thursday	16	156	14.24	57.2953	137.422	49.0349	0.708333	16.2059
2022-03-04	0	1524	2022	3	4	Friday	13	146	14.13	59.3712	204.9	32.1938	0.536775	11.5088
2022-03-05	0	1525	2022	3	5	Saturday	20	163	11.62	23.0714	170.505	26.1036	0.465179	9.8
2022-03-06	0	1526	2022	3	6	Sunday	11	142	8.44	27.4388	84.9	30.6456	0.54989	12.96
2022-03-07	0	1527	2022	3	7	Monday	15	164	11.35	43.1267	97.3788	27.1943	0.629762	12.0321
2022-03-08	0	1528	2022	3	8	Tuesday	16	197	13.02	62.5462	175.953	32.1975	0.777273	12.1583
2022-03-09	0	1529	2022	3	9	Wednesday	25	155	14.6	47.4362	171.591	28.937	0.754167	14.367
2022-03-10	0	1530	2022	3	10	Thursday	12	144	17.6	71.0398	130.901	27.4351	0.903261	16.537
2022-03-11	0	1531	2022	3	11	Friday	10	168	20.11	70.5386	133.558	31.125	0.958333	15.1083
2022-03-12	0	1532	2022	3	12	Saturday	7	169	20.26	69.5083	103.325	26.3	0.927083	10.875
2022-03-13	0	1533	2022	3	13	Sunday	11	137	21.37	116.4	133.667	35.9417	1.30833	10.5
2022-03-14	0	1534	2022	3	14	Monday	8	135	18.97	83.8478	178.25	27.5881	0.983333	8.29524
2022-03-15	0	1535	2022	3	15	Tuesday	22	172	18.05	49.9602	180.874	21.8212	0.806522	10.6133
2022-03-16	0	1536	2022	3	16	Wednesday	15	154	22.03	69.4945	177.327	37.3617	1.15188	18.1474
2022-03-17	0	1537	2022	3	17	Thursday	8	144	9.18	21.9205	49.2569	15.5232	0.632971	8.58442
2022-03-18	0	1538	2022	3	18	Friday	18	131	9.83	34.5417	62.1667	23.6083	0.583333	10.2
2022-03-19	0	1539	2022	3	19	Saturday	6	124	9.34	47.7606	62.5587	20.2333	0.70625	8.06667
2022-03-20	0	1540	2022	3	20	Sunday	14	118	5	54.4917	76.0356	29.9	0.827083	10.95
2022-03-21	0	1541	2022	3	21	Monday	18	189	3.43	59.1417	89.7235	45.7167	0.954167	13.2833
2022-03-22	0	1542	2022	3	22	Tuesday	9	183	7.15	66.6197	94.4788	39.4522	0.841667	15.3543
2022-03-23	0	1543	2022	3	23	Wednesday	17	128	9.33	32.7935	56.0263	14.6116	0.568659	9.15797
2022-03-24	0	1544	2022	3	24	Thursday	12	121	11.68	32.7848	43.5909	11.8257	0.675091	8.89167
2022-03-25	0	1545	2022	3	25	Friday	10	117	14.75	67.3167	66.1379	22.285	0.9875	8.425
2022-03-26	0	1546	2022	3	26	Saturday	14	103	11.43	42.6955	109.836	21.3864	0.654167	9.73114
2022-03-27	0	1547	2022	3	27	Sunday	16	111	11.44	16.257	55.9606	16.875	0.416667	8.03333
2022-03-28	0	1548	2022	3	28	Monday	11	124	11.95	18.8076	53.7727	21.9475	0.535417	11.4833
2022-03-29	0	1549	2022	3	29	Tuesday	10	135	14.64	33.0939	60.0098	16.3765	0.70625	11.2174
2022-03-30	0	1550	2022	3	30	Wednesday	7	115	16.31	67.5667	85.7167	27.325	0.933333	9.85
2022-03-31	0	1551	2022	3	31	Thursday	14	111	11.05	33.6538	51.747	17.4924	0.774638	9.33261
2022-04-01	0	1552	2022	4	1	Friday	9	99	10.05	23.7962	48.2739	16.7515	0.528986	9.41413
2022-04-02	0	1553	2022	4	2	Saturday	11	105	11.28	41.0917	68.525	17.65	0.61875	10.15
2022-04-03	1	1554	2022	4	3	Sunday	22	105	11.9	55.2583	84.9083	27.8667	0.679167	10.7417
2022-04-04	1	1555	2022	4	4	Monday	10	99	12.86	39.1399	61.9431	14.0902	0.664583	11.0167
2022-04-05	1	1556	2022	4	5	Tuesday	16	98	16.78	42.2619	74.1669	16.423	0.785417	12.5341
2022-04-06	0	1557	2022	4	6	Wednesday	14	140	19.02	63.975	106.726	25.517	1.05498	14.8188
2022-04-07	0	1558	2022	4	7	Thursday	23	142	19.2	57.4571	102.442	24.412	0.887228	12.475
2022-04-08	0	1559	2022	4	8	Friday	13	132	20.64	69.5504	104.787	12.8962	1.00417	10.5207
2022-04-09	0	1560	2022	4	9	Saturday	11	133	20.98	28.1833	79.9667	11.0493	0.752083	11.225
2022-04-10	0	1561	2022	4	10	Sunday	17	131	22.77	31.4261	86.1689	13.6661	0.786957	13.2783
2022-04-11	0	1562	2022	4	11	Monday	17	130	23.76	37.7	84.2667	11.3071	0.80625	12.4083
2022-04-12	0	1563	2022	4	12	Tuesday	22	136	21.13	31.8119	90.4291	10.8563	0.697917	8.06035
2022-04-13	0	1564	2022	4	13	Wednesday	12	147	12.05	17.9452	46.2894	17.6447	0.637138	11.7233
2022-04-14	0	1565	2022	4	14	Thursday	9	115	12.02	31.2888	63.5971	31.025	0.81875	13.3869
2022-04-15	0	1566	2022	4	15	Friday	4	124	13.19	33.4792	69.3095	19.1	0.722917	12.2726
2022-04-16	0	1567	2022	4	16	Saturday	16	118	12.65	20.3011	44.9947	20.9197	0.602083	10.5886
2022-04-17	0	1568	2022	4	17	Sunday	9	159	13.49	29.1	57.55	20.1917	0.614583	10.075
2022-04-18	0	1569	2022	4	18	Monday	16	166	15.53	32.6288	63.1917	14.35	0.639583	10.1333
2022-04-19	0	1570	2022	4	19	Tuesday	11	145	15.74	49.6638	75.2543	23.2962	0.766667	11.8772
2022-04-20	0	1571	2022	4	20	Wednesday	18	137	16.51	35.6048	85.0954	10.1623	0.705114	9.80115
2022-04-21	0	1572	2022	4	21	Thursday	10	135	19.55	24.5032	68.7368	7.47047	0.691667	8.57938
2022-04-22	0	1573	2022	4	22	Friday	10	104	22.05	29.9833	102.092	15.7214	0.827083	11.6
2022-04-23	0	1574	2022	4	23	Saturday	14	125	21.76	35.15	100.858	19.3485	0.933333	13.3167
2022-04-24	0	1575	2022	4	24	Sunday	11	114	22.7	33.4583	63.4667	9.29833	0.895833	9.78333
2022-04-25	0	1576	2022	4	25	Monday	15	119	22.05	38.025	69.4971	18.5714	0.991667	12.7083
2022-04-26	0	1577	2022	4	26	Tuesday	10	124	21.73	43.7607	95.3909	17.4417	1.01042	10.675
2022-04-27	0	1578	2022	4	27	Wednesday	13	138	19.66	24.1844	137.991	19.5505	0.572736	11.5638
2022-04-28	0	1579	2022	4	28	Thursday	9	132	14.64	25.7663	90.9515	26.7076	0.750634	9.49167
2022-04-29	0	1580	2022	4	29	Friday	7	115	14.06	57.325	72.0609	23.4493	0.872917	7.00606
2022-04-30	1	1581	2022	4	30	Saturday	4	98	14.12	48.975	81.0924	20.95	0.73125	8.90833
2022-05-01	1	1582	2022	5	1	Sunday	8	161	14.76	27.4667	75.5417	29.6367	0.627083	12.5167
2022-05-02	1	1583	2022	5	2	Monday	8	139	17.9	30.3991	73.9591	24.5333	0.627083	12.8917
2022-05-03	1	1584	2022	5	3	Tuesday	12	160	20.51	36.5407	91.368	18.9866	0.784091	15.2403
2022-05-04	1	1585	2022	5	4	Wednesday	7	109	21.28	23.4228	89.1746	10.1432	0.609511	10.5123
2022-05-05	0	1586	2022	5	5	Thursday	12	136	21.65	22.4855	73.3327	11.1476	0.635417	10.8192
2022-05-06	0	1587	2022	5	6	Friday	27	152	22.59	31.25	84.3167	14.6833	0.795833	12.8583
2022-05-07	0	1588	2022	5	7	Saturday	12	130	21.58	31.587	74.6717	15.9667	0.76875	9.55833
2022-05-08	0	1589	2022	5	8	Sunday	12	120	19.37	26.7833	68.9	25.0417	0.791667	14.1333
2022-05-09	0	1590	2022	5	9	Monday	25	126	18.51	46.5881	63.2399	26.525	0.989583	8.74167
2022-05-10	0	1591	2022	5	10	Tuesday	10	140	16.65	49.7428	63.8704	21.7058	0.870833	8.26449
2022-05-11	0	1592	2022	5	11	Wednesday	18	188	18.12	74.6394	93.4921	31.693	0.977273	10.8984
2022-05-12	0	1593	2022	5	12	Thursday	9	186	19.97	68.6319	91.4975	24.16	0.959058	12.4717
2022-05-13	0	1594	2022	5	13	Friday	19	135	19.6	38.1645	53.1127	18.1952	0.797917	9.11667
2022-05-14	0	1595	2022	5	14	Saturday	4	148	17.3	27.2163	66.0066	38.6721	0.6625	11.9815
2022-05-15	0	1596	2022	5	15	Sunday	8	175	17.37	22.8	57.6833	25.0667	0.60625	14.1667
2022-05-16	0	1597	2022	5	16	Monday	6	156	18.77	24.6707	63.5399	23.1917	0.633333	13.7583
2022-05-17	0	1598	2022	5	17	Tuesday	21	147	20.87	23.1076	81.7435	19.6634	0.595833	13.6163
2022-05-18	0	1599	2022	5	18	Wednesday	16	163	21.9	25.3022	77.3041	13.2187	0.650815	10.6109
2022-05-19	0	1600	2022	5	19	Thursday	13	154	20.73	23.8203	57.2424	14.7909	0.702083	11.0321
2022-05-20	0	1601	2022	5	20	Friday	14	138	21.65	24.967	55.3475	16.8286	0.712121	11.5621
2022-05-21	0	1602	2022	5	21	Saturday	8	127	22.6	26.0977	63.4815	21.4152	0.752083	12.7417
2022-05-22	0	1603	2022	5	22	Sunday	6	102	23.16	26.65	58	15.5	0.731341	11.247
2022-05-23	0	1604	2022	5	23	Monday	25	122	24.15	32.75	66.6667	17.7396	0.797917	13.1667
2022-05-24	0	1605	2022	5	24	Tuesday	16	142	24.43	32.3992	67.0045	12.9507	0.8625	11.8873
2022-05-25	0	1606	2022	5	25	Wednesday	13	141	25.9	25.9253	74.5447	12.3517	0.768931	9.81293
2022-05-26	0	1607	2022	5	26	Thursday	11	122	22.98	17.1767	49.1133	25.6498	0.643864	10.5518
2022-05-27	0	1608	2022	5	27	Friday	21	124	25.39	22.3197	59.4867	29.4247	0.777273	15.5867
2022-05-28	0	1609	2022	5	28	Saturday	12	141	23.39	21.8144	61.9315	10.2765	0.718939	10.5826
2022-05-29	0	1610	2022	5	29	Sunday	13	137	25.83	20.6952	46.5	7.92511	0.893939	8.88214
2022-05-30	0	1611	2022	5	30	Monday	20	143	25.02	9.18169	40.7846	17.1576	0.615909	11.1955
2022-05-31	0	1612	2022	5	31	Tuesday	11	168	25.36	19.6377	65.7435	14.2341	0.734289	11.1955
2022-06-01	0	1613	2022	6	1	Wednesday	14	325	28	37.1313	95.9778	16.7008	1.01187	14.4882
2022-06-02	0	1614	2022	6	2	Thursday	18	159	28.23	37.6531	94.5349	28.4284	1.00625	15.1368
2022-06-03	1	1615	2022	6	3	Friday	12	117	28.24	33.9011	95.5362	15.6025	0.918025	13.592
2022-06-04	1	1616	2022	6	4	Saturday	22	132	28.96	28.4457	72.6903	14.2667	0.858333	10.175
2022-06-05	1	1617	2022	6	5	Sunday	17	140	27.15	40.5164	94.6659	22.5013	0.855176	12.8713
2022-06-06	0	1618	2022	6	6	Monday	11	140	27.64	23.0583	91.203	16.8453	0.725	11.7315
2022-06-07	0	1619	2022	6	7	Tuesday	20	148	25.37	19.1166	59.0474	14.9794	0.671739	11.9818
2022-06-08	0	1620	2022	6	8	Wednesday	19	154	26.72	27.9705	123.164	15.6133	0.766214	13.4975
2022-06-09	0	1621	2022	6	9	Thursday	8	121	28.18	21.7522	55.7788	14.5538	0.63125	8.48732
2022-06-10	0	1622	2022	6	10	Friday	9	128	25.94	31.6274	67.864	15.7638	0.745743	9.12246
2022-06-11	0	1623	2022	6	11	Saturday	18	116	24.93	28.8983	60.512	12.7036	0.582609	9.67391
2022-06-12	0	1624	2022	6	12	Sunday	23	86	22.96	19.9714	67.8976	10.1238	0.516667	10.3143
2022-06-13	0	1625	2022	6	13	Monday	20	139	24.82	23	77	9	0.5	10
2022-06-14	0	1626	2022	6	14	Tuesday	17	123	25.8	10.105	28.7263	11.0842	0.432955	8.16439
2022-06-15	0	1627	2022	6	15	Wednesday	5	126	28.31	25.0189	56.4398	26.0591	0.566938	9.91884
2022-06-16	0	1628	2022	6	16	Thursday	14	144	30.34	38.4952	74.812	15.647	0.86875	12.2768
2022-06-17	0	1629	2022	6	17	Friday	17	134	30.5	27.8674	70.3813	13.3087	0.807699	10.2283
2022-06-18	0	1630	2022	6	18	Saturday	16	149	29.34	20.95	55.8387	15.8087	0.683333	8.60833
2022-06-19	0	1631	2022	6	19	Sunday	17	156	27.16	27.0917	61.0775	18.9	0.767424	10.9167
2022-06-20	0	1632	2022	6	20	Monday	27	169	28.85	26.7283	60.8522	19.1105	0.591667	12.8522
2022-06-21	0	1633	2022	6	21	Tuesday	26	149	29.4	28.8145	57.2355	14.1293	0.552083	7.28696
2022-06-22	0	1634	2022	6	22	Wednesday	28	175	31.28	19.4674	44.2569	12.3576	0.584149	7.85326
2022-06-23	0	1635	2022	6	23	Thursday	13	151	29.65	20.4216	34.5349	10.9978	0.55	5.23254
2022-06-24	0	1636	2022	6	24	Friday	16	180	30.26	36.5667	66.7167	21.3007	0.638406	6.03669
2022-06-25	0	1637	2022	6	25	Saturday	14	177	30.47	18.275	41.675	12.7489	0.445833	5.825
2022-06-26	0	1638	2022	6	26	Sunday	23	173	31.6	17.0225	37.6158	9.76667	0.467262	5.71071
2022-06-27	0	1639	2022	6	27	Monday	17	240	31.05	11.7827	19.8045	8.40172	0.3375	4.34737
2022-06-28	0	1640	2022	6	28	Tuesday	12	186	28.44	24.4909	37.2596	8.51212	0.5625	5.81515
2022-06-29	0	1641	2022	6	29	Wednesday	9	138	29.9	28.0938	44.7783	12.1178	0.694112	6.79312
2022-06-30	0	1642	2022	6	30	Thursday	13	97	29.45	35.0867	52.5394	17.5393	0.870833	7.32262
2022-07-01	0	1643	2022	7	1	Friday	9	154	28.64	23.0763	39.9123	12.5937	0.699819	7.32387
2022-07-02	0	1644	2022	7	2	Saturday	13	204	29.78	29.6856	52.875	16.525	0.7125	6.09601
2022-07-03	0	1645	2022	7	3	Sunday	12	114	29.51	20.52	45.175	10.2667	0.5625	6.25
2022-07-04	0	1646	2022	7	4	Monday	20	150	28.8	11.9553	22.0108	8.89783	0.539167	5.59746
2022-07-05	0	1647	2022	7	5	Tuesday	11	129	28.17	20.1743	32.6699	14.8261	0.720833	5.92862
2022-07-06	0	1648	2022	7	6	Wednesday	18	134	28.16	6.30556	11.2826	7.10362	0.491848	4.88594
2022-07-07	0	1649	2022	7	7	Thursday	10	138	29.09	9.48604	23.9707	9.24804	0.65	5.38986
2022-07-08	0	1650	2022	7	8	Friday	14	147	30.59	15.9202	39.0629	12.7109	0.676449	6.32609
2022-07-09	0	1651	2022	7	9	Saturday	13	209	30.91	17.253	43.8667	12.9604	0.64375	7.96964
2022-07-10	0	1652	2022	7	10	Sunday	9	153	31.36	21.14	36.4348	9.3	0.6875	5.15833
2022-07-11	0	1653	2022	7	11	Monday	15	130	32.33	48.8298	75.1864	11.1855	0.960417	5.74529
2022-07-12	0	1654	2022	7	12	Tuesday	12	112	33.48	25.2674	46.7484	7.7381	0.7625	5.31123
2022-07-13	0	1655	2022	7	13	Wednesday	12	137	33.98	27.1992	42.7098	11.5144	0.746014	6.03406
2022-07-14	0	1656	2022	7	14	Thursday	11	159	33.76	28.2482	44.5919	17.0781	0.929412	5.62684
2022-07-15	0	1657	2022	7	15	Friday	19	98	32.91	47.3929	69.7136	19.6335	1.15553	6.56212
2022-07-16	0	1658	2022	7	16	Saturday	11	112	32.69	33.2	50.5609	14.25	0.88125	7.25
2022-07-17	0	1659	2022	7	17	Sunday	2	85	30.05	17.1417	27.3	10.4333	0.80625	6.075
2022-07-18	0	1660	2022	7	18	Monday	7	160	29.57	28.4587	51.9565	19.5145	0.820833	7.44058
2022-07-19	0	1661	2022	7	19	Tuesday	10	121	31.3	44.5824	79.8252	20.9203	0.883333	7.49982
2022-07-20	0	1662	2022	7	20	Wednesday	10	124	27.99	21.15	29.375	12.0476	0.744565	5.74203
2022-07-21	0	1663	2022	7	21	Thursday	8	132	28.48	27.7	44.975	10.5011	0.695833	7.00906
2022-07-22	0	1664	2022	7	22	Friday	11	114	31.83	26.6738	45.3417	15.4333	0.731884	7.02029
2022-07-23	0	1665	2022	7	23	Saturday	8	111	27.94	8.55936	19.7895	9.38333	0.541667	6.40833
2022-07-24	0	1666	2022	7	24	Sunday	8	107	28.7	22.075	40.2333	17.45	0.691667	8.49167
2022-07-25	0	1667	2022	7	25	Monday	8	103	30.71	27.3333	48.0583	11.0105	0.704167	7.57717
2022-07-26	0	1668	2022	7	26	Tuesday	7	130	29.58	18.0083	34.4083	8.21304	0.664583	7.89964
2022-07-27	0	1669	2022	7	27	Wednesday	4	114	31.84	25.8593	45.1649	11.5757	0.742935	8.29601
2022-07-28	0	1670	2022	7	28	Thursday	11	104	31.68	14.5314	27.7942	10.7554	0.616667	6.58659
2022-07-29	0	1671	2022	7	29	Friday	6	105	29.31	21.9667	34.325	13.2151	0.707971	8.62609
2022-07-30	0	1672	2022	7	30	Saturday	7	137	29.53	17.103	33.372	12.275	0.7	10.5333
2022-07-31	0	1673	2022	7	31	Sunday	8	153	28.11	17.5104	35.3417	13.1379	0.620833	7.50833
2022-08-01	0	1674	2022	8	1	Monday	18	154	30.6	28.1971	53.642	17.4786	0.730344	7.64538
2022-08-02	0	1675	2022	8	2	Tuesday	18	114	31.89	27.7143	54.0728	15.0131	0.6875	21.1845
2022-08-03	0	1676	2022	8	3	Wednesday	11	133	32.54	27.2053	49.025	10.2862	0.751359	6.46812
2022-08-04	0	1677	2022	8	4	Thursday	12	142	32.51	35.9836	62.7898	9.51799	1.02083	6.07337
2022-08-05	0	1678	2022	8	5	Friday	29	149	32.85	27.6993	52.725	9.19783	0.852717	6.10725
2022-08-06	0	1679	2022	8	6	Saturday	29	142	32.04	15.6917	38.825	9.53561	0.73125	5.75
2022-08-07	0	1680	2022	8	7	Sunday	25	132	32.88	11.4333	31.9083	6.48478	0.7125	5.76667
2022-08-08	0	1681	2022	8	8	Monday	17	136	33.4	16.442	41.5242	9.11258	0.748918	6.65165
2022-08-09	0	1682	2022	8	9	Tuesday	16	162	34.05	16.4667	35.075	11.4851	0.677083	5.70688
2022-08-10	0	1683	2022	8	10	Wednesday	11	133	33.4	22.5551	37.5732	13.5257	0.748007	5.8163
2022-08-11	0	1684	2022	8	11	Thursday	8	130	34.98	37.1856	59.9409	14.1429	0.833333	6.34833
2022-08-12	0	1685	2022	8	12	Friday	13	147	34.88	24.2135	48.6872	12.5332	0.740613	7.18024
2022-08-13	0	1686	2022	8	13	Saturday	15	129	35.31	13.925	37.3167	8.7303	0.657386	7.77059
2022-08-14	0	1687	2022	8	14	Sunday	12	112	36.24	14.0417	38.4583	7.91014	0.658333	8.025
2022-08-15	0	1688	2022	8	15	Monday	11	107	35.46	23.6	49.3833	9.34544	0.791667	8.05331
2022-08-16	0	1689	2022	8	16	Tuesday	20	105	30.55	14.9667	39.1714	15.3575	0.764583	9.90662
2022-08-17	0	1690	2022	8	17	Wednesday	10	113	29.98	19.5917	46.1583	16.1833	0.710417	8.925
2022-08-18	0	1691	2022	8	18	Thursday	18	101	33.72	21.6896	49.2568	9.36858	0.781522	8.59612
2022-08-19	0	1692	2022	8	19	Friday	12	91	35.74	24.8058	47.4083	10.463	0.882428	7.0163
2022-08-20	0	1693	2022	8	20	Saturday	19	109	32.51	16.1284	39.045	20.5325	0.843841	10.3607
2022-08-21	0	1694	2022	8	21	Sunday	8	96	34.05	15.4094	43.7098	13.9371	0.727083	10.7659
2022-08-22	0	1695	2022	8	22	Monday	6	116	34.58	15.7094	43.6083	8.89486	0.772101	7.99094
2022-08-23	0	1696	2022	8	23	Tuesday	11	115	31.23	7.36634	30.9888	12.0279	0.480435	8.13478
2022-08-24	0	1697	2022	8	24	Wednesday	12	125	28.43	7.18476	32.1588	20.8243	0.379438	8.82609
2022-08-25	0	1698	2022	8	25	Thursday	13	118	29.73	28.3819	53.0952	33.9819	0.691667	9.81449
2022-08-26	0	1699	2022	8	26	Friday	15	84	27.56	37.6917	53.1333	18.7865	0.737047	8.39144
2022-08-27	0	1700	2022	8	27	Saturday	11	71	27.06	11.3054	39.5221	21.3837	0.470833	10.2327
2022-08-28	0	1701	2022	8	28	Sunday	14	78	27.09	7.90379	25.4667	18.4667	0.460417	8.61667
2022-08-29	0	1702	2022	8	29	Monday	9	116	27.12	9.08768	17.5344	14.2489	0.629167	6.83561
2022-08-30	0	1703	2022	8	30	Tuesday	13	106	24.17	20.8105	28.6184	17.3386	0.710526	8.78947
2022-08-31	0	1704	2022	8	31	Wednesday	6	92	23.25	14.8321	34.2947	15.2471	0.545652	9.28514
2022-09-01	0	1705	2022	9	1	Thursday	9	78	24.83	27.8394	56.4656	19.546	0.7625	10.7815
2022-09-02	0	1706	2022	9	2	Friday	10	70	25.43	31.7384	61.2196	19.4543	0.756069	11.55
2022-09-03	0	1707	2022	9	3	Saturday	6	79	25.05	18.2917	48.975	21.425	0.629167	11.2583
2022-09-04	0	1708	2022	9	4	Sunday	9	53	25.62	27.39	51.05	17.64	0.75	18.02
2022-09-05	0	1709	2022	9	5	Monday	8	40	26.3	37.2087	65.6	15.9478	0.776087	13.0609
2022-09-06	0	1710	2022	9	6	Tuesday	22	80	29.91	48.3667	84.4667	13.5	0.872917	13.1667
2022-09-07	0	1711	2022	9	7	Wednesday	11	71	27.12	15.4583	41.5083	15.7583	0.470833	12.0333
2022-09-08	0	1712	2022	9	8	Thursday	14	75	26.32	26.4479	58.3023	16.1417	0.627083	14.8083
2022-09-09	0	1713	2022	9	9	Friday	12	50	24.65	29.4417	62.5417	13.4167	0.695833	16.225
2022-09-10	1	1714	2022	9	10	Saturday	6	43	25.47	27.669	56.7862	11.8254	0.664583	13.3714
2022-09-11	1	1715	2022	9	11	Sunday	8	34	25.83	50.6309	85.0545	11.5636	0.768182	15.2091
2022-09-12	1	1716	2022	9	12	Monday	11	39	26.23	57.3765	85.2076	11.4826	0.827083	13.1438
2022-09-13	0	1717	2022	9	13	Tuesday	9	46	25.87	25.71	51.9333	14.4167	0.583333	12.3333
2022-09-14	0	1718	2022	9	14	Wednesday	10	49	25.8	30.7293	55.1917	14.253	0.654167	10.7417
2022-09-15	0	1719	2022	9	15	Thursday	4	47	25.65	11.8849	31.45	10.8916	0.525	7.97935
2022-09-16	0	1720	2022	9	16	Friday	11	82	25.89	11.9905	28.0091	12.1917	0.521739	8.76486
2022-09-17	0	1721	2022	9	17	Saturday	9	71	26.53	22.1333	45.125	22.4417	0.677083	12.1583
2022-09-18	0	1722	2022	9	18	Sunday	7	57	26.81	32.7754	66.825	23.8333	0.75625	12.9917
2022-09-19	0	1723	2022	9	19	Monday	8	71	25.74	9.25	46.15	16.9565	0.445833	11.8736
2022-09-20	0	1724	2022	9	20	Tuesday	8	58	22.99	10.9947	44.5583	26.3255	0.491667	11.95
2022-09-21	0	1725	2022	9	21	Wednesday	7	54	22.74	20.2417	56.7417	27.9855	0.4375	12.5272
2022-09-22	0	1726	2022	9	22	Thursday	12	57	23.81	20.2583	57.3417	20.3	0.4875	12.2667
2022-09-23	0	1727	2022	9	23	Friday	9	49	22.73	11.0736	78.7746	16.6417	0.254076	7.53514
2022-09-24	0	1728	2022	9	24	Saturday	11	71	20.83	24.075	67.4528	36.9583	0.495833	14.875
2022-09-25	0	1729	2022	9	25	Sunday	5	72	22.25	28.8808	69.2962	27.975	0.477083	13.0833
2022-09-26	0	1730	2022	9	26	Monday	5	53	24.19	31.5757	68.0159	30.7123	0.604167	13.2663
2022-09-27	0	1731	2022	9	27	Tuesday	6	72	24.14	37.0232	73.1391	33.604	0.602083	17.5007
2022-09-28	0	1732	2022	9	28	Wednesday	7	63	23.53	33.6152	65.975	26.5243	0.51567	14.8178
2022-09-29	0	1733	2022	9	29	Thursday	9	47	25.27	36.9553	68.275	24.112	0.652083	12.4917
2022-09-30	0	1734	2022	9	30	Friday	16	86	28.19	25.4462	52.0568	20.3777	0.661322	11.4588
2022-10-01	1	1735	2022	10	1	Saturday	9	126	31.04	33.221	50.8958	15.4479	0.702083	9.35417
2022-10-02	1	1736	2022	10	2	Sunday	8	101	33.8	13.6975	22.4347	12.3389	0.7875	7.72778
2022-10-03	1	1737	2022	10	3	Monday	9	164	33.7	17.3943	26.3206	14.6917	0.804167	8.20833
2022-10-04	1	1738	2022	10	4	Tuesday	15	148	18.01	5.88081	19.5833	12.0917	0.275	7.17029
2022-10-05	1	1739	2022	10	5	Wednesday	14	127	13.09	14.1309	28.429	20.7167	0.440851	9.33768
2022-10-06	1	1740	2022	10	6	Thursday	12	136	12.46	38.5708	48.2	26.7565	0.521739	10.5826
2022-10-07	1	1741	2022	10	7	Friday	9	124	13.23	39.7638	50.925	24.8478	0.475725	10.0489
2022-10-08	0	1742	2022	10	8	Saturday	12	109	14.87	39.3167	51.2417	23.5417	0.491667	10.625
2022-10-09	0	1743	2022	10	9	Sunday	4	96	14.52	21.5276	58.475	16.9667	0.258333	7.8
2022-10-10	0	1744	2022	10	10	Monday	8	121	11.58	9.93636	32.225	23.6855	0.220833	7.59891
2022-10-11	0	1745	2022	10	11	Tuesday	19	158	13.27	27.325	52.3583	37.208	0.410417	9.64384
2022-10-12	0	1746	2022	10	12	Wednesday	17	219	14.39	42.1333	65.4083	44.5663	0.508605	10.6884
2022-10-13	0	1747	2022	10	13	Thursday	10	161	15.51	38.75	66.125	42.0909	0.539583	11.108
2022-10-14	0	1748	2022	10	14	Friday	14	107	16.69	58.6833	85.4	46.6014	0.627083	11.9764
2022-10-15	0	1749	2022	10	15	Saturday	12	87	17.34	86.2417	105.823	40.5591	0.735417	12.5286
2022-10-16	0	1750	2022	10	16	Sunday	15	73	18.23	65.2583	94.5417	30.3917	0.63125	13.8909
2022-10-17	0	1751	2022	10	17	Monday	8	101	15.73	8.91818	36.2866	22.4131	0.2875	8.84928
2022-10-18	0	1752	2022	10	18	Tuesday	6	85	11.48	15.3276	41.1083	31.2373	0.327083	8.18587
2022-10-19	0	1753	2022	10	19	Wednesday	11	128	12.62	36.7553	64.4537	35.5185	0.437047	11.5721
2022-10-20	0	1754	2022	10	20	Thursday	14	99	14.51	29.1818	55.5356	25.7489	0.497917	9.87935
2022-10-21	0	1755	2022	10	21	Friday	8	98	17.42	28.9894	59.4417	28.3486	0.530616	10.4594
2022-10-22	0	1756	2022	10	22	Saturday	1	101	18.08	59.9583	99.8917	39.3167	0.68125	13.0167
2022-10-23	0	1757	2022	10	23	Sunday	7	112	16.57	76.9261	128.05	40.9688	0.783333	12.1333
2022-10-24	0	1758	2022	10	24	Monday	8	122	15.48	47.2667	92.8583	44.747	0.658333	11.7413
2022-10-25	0	1759	2022	10	25	Tuesday	12	90	15.54	40.6583	74.7583	23.4076	0.547917	11.3743
2022-10-26	0	1760	2022	10	26	Wednesday	8	150	14.91	22.0583	48.675	21.725	0.5	11.45
2022-10-27	0	1761	2022	10	27	Thursday	16	137	16.16	26.9667	55.0136	26.5034	0.569656	10.5152
2022-10-28	0	1762	2022	10	28	Friday	12	112	16.49	43.7083	69.925	22.513	0.647554	8.75797
2022-10-29	0	1763	2022	10	29	Saturday	8	88	14.69	48.1417	75.3083	25.2667	0.652083	12.0583
2022-10-30	0	1764	2022	10	30	Sunday	10	84	14.76	46.2758	71.9045	26.0167	0.747917	12.125
2022-10-31	0	1765	2022	10	31	Monday	9	83	15.73	78.6929	98.4891	30.3514	0.822917	10.5467
2022-11-01	0	1766	2022	11	1	Tuesday	12	80	15.68	113.338	137.685	26.2993	0.979167	13.2014
2022-11-02	0	1767	2022	11	2	Wednesday	11	60	14.74	24.5348	50.2583	22.7399	0.511866	12.7399
2022-11-03	0	1768	2022	11	3	Thursday	11	75	14.53	43.7917	70.5333	29.0583	0.64375	10.1833
2022-11-04	0	1769	2022	11	4	Friday	6	106	13.05	29.2656	49.4083	25.3033	0.553533	9.68587
2022-11-05	0	1770	2022	11	5	Saturday	9	68	12.19	47.1667	68.3167	35.7235	0.57619	11.3712
2022-11-06	0	1771	2022	11	6	Sunday	6	77	14.02	64.7341	90.3227	34.3992	0.696023	12.9379
2022-11-07	0	1772	2022	11	7	Monday	5	79	15.4	84.9189	116.573	35.0953	0.910236	13.6065
2022-11-08	0	1773	2022	11	8	Tuesday	15	93	15.43	133.033	162.358	39.1221	1.20625	13.1391
2022-11-09	0	1774	2022	11	9	Wednesday	16	95	17.49	99.2333	125.8	34.7428	0.858333	11.125
2022-11-10	0	1775	2022	11	10	Thursday	10	126	19.33	64.6667	82.3917	39.8667	0.669318	8.35
2022-11-11	0	1776	2022	11	11	Friday	20	118	20.33	49.1024	59.9159	28.9733	0.597348	8.20357
2022-11-12	0	1777	2022	11	12	Saturday	15	101	17.05	28.8909	41.4461	19.4962	0.597538	6.87652
2022-11-13	0	1778	2022	11	13	Sunday	8	64	10.76	15.9917	26.9326	20.4583	0.36875	8.2
2022-11-14	0	1779	2022	11	14	Monday	6	80	9.55	45.2455	60.98	34.2808	0.45	12.6457
2022-11-15	0	1780	2022	11	15	Tuesday	12	107	10.24	68.521	83.0333	35.925	0.5375	13.8283
2022-11-16	0	1781	2022	11	16	Wednesday	18	87	11.33	87.275	104.575	42.5395	0.701178	12.3287
2022-11-17	0	1782	2022	11	17	Thursday	14	121	12.65	102.508	121.337	41.0225	0.747917	12.9862
2022-11-18	0	1783	2022	11	18	Friday	13	94	14.66	64.1837	79.7233	42.576	0.666522	9.33232
2022-11-19	0	1784	2022	11	19	Saturday	9	90	14.51	49.4333	54.8667	31.475	0.6	8.01667
2022-11-20	0	1785	2022	11	20	Sunday	13	93	13.8	58.775	65.8917	35	0.629167	8.54167
2022-11-21	0	1786	2022	11	21	Monday	7	104	14.66	70.5917	82.3083	42.9924	0.854167	10.2145
2022-11-22	0	1787	2022	11	22	Tuesday	15	76	14.72	47.5367	50.8167	29.4826	0.954167	7.78152
2022-11-23	0	1788	2022	11	23	Wednesday	20	101	12.87	57.2833	62.525	25.2199	0.782065	7.04891
2022-11-24	0	1789	2022	11	24	Thursday	16	100	13.73	52.2583	55.1167	18.6083	0.81875	7.84167
2022-11-25	0	1790	2022	11	25	Friday	18	92	15.19	71.2525	79.9	32.9855	0.883514	9.20833
2022-11-26	0	1791	2022	11	26	Saturday	7	133	14.76	41.0514	81.3083	30.1714	0.66875	11.5561
2022-11-27	0	1792	2022	11	27	Sunday	9	80	16.54	48.1083	84.9	23.8667	0.664583	9.94524
2022-11-28	0	1793	2022	11	28	Monday	9	128	13.66	38.4121	51.9	28.4674	0.954167	8.40326
2022-11-29	0	1794	2022	11	29	Tuesday	15	105	6.62	22.6825	91.8689	10.4833	0.293371	7.40833
2022-11-30	0	1795	2022	11	30	Wednesday	11	67	-1.02	10.2109	35.8841	6.86232	0.304348	8.18261
2022-12-01	0	1796	2022	12	1	Thursday	21	89	-0.47	31.0826	55.7583	23.5402	0.360417	13.3803
2022-12-02	0	1797	2022	12	2	Friday	24	88	1.19	44.2696	69.5739	32.4783	0.406917	13.5356
2022-12-03	0	1798	2022	12	3	Saturday	12	87	4.83	55.4417	83.2667	39.4083	0.59375	15.1417
2022-12-04	0	1799	2022	12	4	Sunday	19	101	3.75	19.7098	44.2083	26.3167	0.581431	12.7667
2022-12-05	0	1800	2022	12	5	Monday	10	148	3.6	38.2553	61.6696	40.5217	0.617391	16.8087
2022-12-06	0	1801	2022	12	6	Tuesday	20	154	4.69	72.025	97.8583	43.1507	0.708333	15.4025
2022-12-07	0	1802	2022	12	7	Wednesday	17	128	6.64	88.5568	109.442	43.1571	0.863043	13.4507
2022-12-08	0	1803	2022	12	8	Thursday	11	89	8.55	100.583	130.978	50.4826	1.01667	18.1989
2022-12-09	0	1804	2022	12	9	Friday	19	95	8.44	170.04	198.57	67.4924	1.53125	15.6917
2022-12-10	0	1805	2022	12	10	Saturday	18	79	6.15	114.12	147.695	35.2488	1.16739	10.1841
2022-12-11	0	1806	2022	12	11	Sunday	13	66	1.14	26.925	54.1167	37.0417	0.535417	14.3083
2022-12-12	0	1807	2022	12	12	Monday	19	62	1.91	48.675	108.992	40.8288	0.583333	15.5333
2022-12-13	0	1808	2022	12	13	Tuesday	26	67	2.51	35.925	145.45	32.0598	0.5	13.1775
2022-12-14	0	1809	2022	12	14	Wednesday	15	65	0.92	28.2591	79.5106	34.8467	0.494928	13.9145
2022-12-15	0	1810	2022	12	15	Thursday	21	95	5.15	52.2053	117.338	36.5015	0.69375	15.396
2022-12-16	0	1811	2022	12	16	Friday	23	80	1.66	32.5023	55.3432	23.6967	0.57038	11.2856
2022-12-17	0	1812	2022	12	17	Saturday	11	57	-1.68	24.0667	80.2333	22.8992	0.452083	11.719
2022-12-18	0	1813	2022	12	18	Sunday	19	69	-0.79	28.7833	78.025	30.5583	0.477083	12.8
2022-12-19	0	1814	2022	12	19	Monday	17	51	2.53	86.7417	122.502	50.0568	0.835417	21.0143
2022-12-20	0	1815	2022	12	20	Tuesday	25	112	3.34	112.842	146.358	62.2558	0.970833	24.6351
2022-12-21	0	1816	2022	12	21	Wednesday	21	102	3.9	114.405	166.133	63.4085	1.21803	26.0663
2022-12-22	0	1817	2022	12	22	Thursday	29	98	-0.55	14.6165	52.9273	14.2818	0.406818	11.4182
2022-12-23	0	1818	2022	12	23	Friday	50	96	0.43	32.2917	61.3083	37.5667	0.633333	17.925
2022-12-24	0	1819	2022	12	24	Saturday	38	96	-0.52	29.6435	48.5652	28.3565	0.545652	20.2609
2022-12-25	0	1820	2022	12	25	Sunday	37	109	0.81	46.3167	66.6859	48.9279	0.808333	23.3767
2022-12-26	0	1821	2022	12	26	Monday	50	113	1.53	79.2134	89.6938	31.4523	0.722917	13.4
2022-12-27	0	1822	2022	12	27	Tuesday	46	132	1.19	127.25	137.533	41.2524	1.00208	10.4286
2022-12-28	0	1823	2022	12	28	Wednesday	56	177	1.05	133.992	151.731	44.9961	1.24058	15.3953
2022-12-29	0	1824	2022	12	29	Thursday	40	138	2.09	130.973	146.9	53.5508	1.07292	14.4207
2022-12-30	0	1825	2022	12	30	Friday	54	105	2.85	155.39	176.56	57.0967	1.3231	17.2833
2022-12-31	1	1826	2022	12	31	Saturday	48	101	3.12	172.555	192.592	57.758	1.1067	17.1413
