# Supplementary material for: Effect of short-term exposure to air pollution on ischemic stroke incidence and mortality: a five-year time-series study in Jining, China
Source: PeerJ journal article supplement (doi:10.7717/peerj.20298), 2025-11-06
Supplement: SuppTables.docx [file SuppTables.docx]

# **Table S1.** RR (%) and 95% CI for the effect of air pollution on ischemic stroke incidence

|  | PM2.5 | PM10 | SO2 | NO2 | CO |
| --- | --- | --- | --- | --- | --- |
| lag0 | 1.009 (0.998-1.020) | 1.005 (0.997-1.013) | 1.009 (0.996-1.023) | 1.031 (1.011-1.051) * | 1.010 (0.998-1.022) |
| lag1 | 1.007 (1.001-1.014) * | 1.004 (0.999-1.009) | 1.005 (0.997-1.013) | 1.021 (1.010-1.032) * | 1.008 (1.001-1.015) * |
| lag2 | 1.006 (1.001-1.011) * | 1.004 (1.000-1.008) | 1.002 (0.995-1.009) | 1.012 (1.003-1.021) * | 1.007 (1.001-1.012) * |
| lag3 | 1.005 (0.998-1.012) | 1.003 (0.998-1.008) | 0.999 (0.991-1.008) | 1.006 (0.994-1.018) | 1.005 (0.998-1.012) |
| lag4 | 1.004 (0.998-1.011) | 1.003 (0.998-1.007) | 0.998 (0.99-1.007) | 1.003 (0.992-1.015) | 1.003 (0.996-1.010) |
| lag5 | 1.003 (0.998-1.009) | 1.002 (0.998-1.006) | 0.999 (0.992-1.005) | 1.004 (0.995-1.013) | 1.001 (0.996-1.006) |
| lag6 | 1.003 (0.997-1.009) | 1.001 (0.996-1.006) | 1.000 (0.993-1.008) | 1.007 (0.997-1.017) | 0.999 (0.993-1.006) |
| lag7 | 1.003 (0.992-1.014) | 1.001 (0.993-1.009) | 1.002 (0.989-1.015) | 1.011 (0.993-1.030) | 0.997 (0.986-1.009) |
| lag01 | 1.016 (0.999-1.034) | 1.009 (0.996-1.022) | 1.015 (0.994-1.036) | 1.052 (1.022-1.083) * | 1.018 (1.000-1.037) |
| lag02 | 1.023 (1.003-1.043) * | 1.013 (0.998-1.028) | 1.017 (0.992-1.042) | 1.065 (1.031-1.101) * | 1.025 (1.004-1.046) * |
| lag03 | 1.028 (1.006-1.050) * | 1.016 (1.000-1.033) * | 1.016 (0.989-1.043) | 1.072 (1.035-1.110) * | 1.030 (1.008-1.052) * |
| lag04 | 1.032 (1.008-1.056) * | 1.019 (1.001-1.037) * | 1.014 (0.985-1.045) | 1.075 (1.035-1.117) * | 1.033 (1.009-1.057) * |
| lag05 | 1.036 (1.010-1.062) * | 1.021 (1.001-1.041) * | 1.013 (0.981-1.046) | 1.079 (1.036-1.124) * | 1.034 (1.008-1.061) * |
| lag06 | 1.039 (1.011-1.067) * | 1.022 (1.001-1.044) * | 1.013 (0.980-1.048) | 1.087 (1.043-1.133) * | 1.033 (1.006-1.061) * |
| lag07 | 1.041 (1.011-1.073) * | 1.023 (0.999-1.047) | 1.015 (0.979-1.053) | 1.099 (1.052-1.149) * | 1.030 (1.000-1.062) |

**p*<0.05

# **Table S2.** RR (%) and 95% CI for the effect of air pollution on ischemic stroke mortality

|  | PM2.5 | PM10 | SO2 | NO2 | CO |
| --- | --- | --- | --- | --- | --- |
| lag0 | 1.049 (1.025-1.073) * | 1.031 (1.014-1.048) * | 0.993 (0.961-1.026) | 1.021 (0.980-1.065) | 1.044 (1.017-1.071) * |
| lag1 | 1.030 (1.017-1.043) * | 1.017 (1.007-1.027) * | 1.004 (0.985-1.024) | 1.019 (0.995-1.043) | 1.024 (1.010-1.039) * |
| lag2 | 1.013 (1.002-1.024) * | 1.005 (0.996-1.014) | 1.014 (0.998-1.030) | 1.016 (0.996-1.036) | 1.007 (0.995-1.019) |
| lag3 | 1.000 (0.986-1.014) | 0.996 (0.985-1.007) | 1.020 (1.000-1.041) * | 1.013 (0.987-1.039) | 0.995 (0.979-1.010) |
| lag4 | 0.992 (0.978-1.006) | 0.991 (0.980-1.002) | 1.021 (1.001-1.041) * | 1.008 (0.983-1.033) | 0.988 (0.973-1.003) |
| lag5 | 0.989 (0.978-1.000) | 0.990 (0.981-0.999) | 1.016 (1.001-1.032) * | 1.002 (0.983-1.021) | 0.987 (0.976-0.999) |
| lag6 | 0.989 (0.976-1.002) | 0.992 (0.982-1.003) | 1.007 (0.989-1.026) | 0.995 (0.973-1.017) | 0.991 (0.976-1.005) |
| lag7 | 0.991 (0.968-1.014) | 0.996 (0.978-1.014) | 0.997 (0.966-1.029) | 0.987 (0.948-1.028) | 0.996 (0.971-1.022) |
| lag01 | 1.080 (1.043-1.118) * | 1.048 (1.021-1.076) * | 0.997 (0.948-1.049) | 1.041 (0.977-1.109) | 1.069 (1.028-1.112) * |
| lag02 | 1.094 (1.051-1.138) * | 1.054 (1.022-1.087) * | 1.011 (0.954-1.072) | 1.058 (0.984-1.137) | 1.077 (1.030-1.126) * |
| lag03 | 1.094 (1.048-1.142) * | 1.049 (1.014-1.087) * | 1.032 (0.968-1.100) | 1.071 (0.992-1.157) | 1.071 (1.021-1.123) * |
| lag04 | 1.085 (1.035-1.138) * | 1.040 (1.000-1.082) | 1.054 (0.982-1.130) | 1.079 (0.992-1.174) | 1.058 (1.004-1.115) * |
| lag05 | 1.073 (1.019-1.131) * | 1.030 (0.986-1.077) | 1.070 (0.991-1.156) | 1.081 (0.988-1.183) | 1.045 (0.987-1.106) |
| lag06 | 1.061 (1.004-1.122) * | 1.022 (0.975-1.072) | 1.078 (0.995-1.169) | 1.075 (0.982-1.177) | 1.035 (0.975-1.098) |
| lag07 | 1.051 (0.988-1.119) | 1.018 (0.966-1.074) | 1.075 (0.985-1.174) | 1.062 (0.964-1.169) | 1.031 (0.965-1.102) |

**p*<0.05

**Table S3.** RR and 95% CI of the effect of air pollution on the ischemic stroke incidence in the female population

|  | PM2.5 | PM10 | SO2 | NO2 | CO |
| --- | --- | --- | --- | --- | --- |
| lag0 | 1.010 (0.999-1.021) | 1.007 (0.998-1.015) | 1.006 (0.992-1.021) | 1.038 (1.019-1.058) * | 1.008 (0.996-1.020) |
| lag1 | 1.007 (1.000-1.013) * | 1.004 (0.999-1.009) | 1.004 (0.996-1.013) | 1.024 (1.013-1.035) * | 1.006 (0.999-1.013) |
| lag2 | 1.003 (0.998-1.009) | 1.002 (0.998-1.006) | 1.002 (0.996-1.009) | 1.012 (1.003-1.021) * | 1.004 (0.998-1.009) |
| lag3 | 1.001 (0.994-1.007) | 1.000 (0.996-1.005) | 1.001 (0.993-1.010) | 1.003 (0.991-1.014) | 1.001 (0.994-1.008) |
| lag4 | 0.999 (0.993-1.006) | 1.000 (0.995-1.004) | 1.000 (0.992-1.009) | 0.999 (0.988-1.011) | 0.999 (0.992-1.006) |
| lag5 | 0.999 (0.994-1.004) | 0.999 (0.995-1.003) | 1.001 (0.994-1.007) | 1.001 (0.992-1.009) | 0.996 (0.991-1.002) |
| lag6 | 0.999 (0.993-1.005) | 1.000 (0.995-1.005) | 1.001 (0.994-1.009) | 1.006 (0.996-1.016) | 0.994 (0.987-1.000) |
| lag7 | 1.000 (0.989-1.011) | 1.001 (0.992-1.009) | 1.002 (0.989-1.016) | 1.013 (0.995-1.031) | 0.991 (0.980-1.003) |
| lag01 | 1.017 (1.000-1.034) * | 1.011 (0.998-1.024) | 1.011 (0.989-1.033) | 1.063 (1.033-1.094) * | 1.014 (0.996-1.033) |
| lag02 | 1.021 (1.001-1.040) * | 1.013 (0.998-1.028) | 1.013 (0.988-1.039) | 1.076 (1.041-1.111) * | 1.018 (0.997-1.039) |
| lag03 | 1.022 (1.001-1.043) * | 1.013 (0.997-1.030) | 1.014 (0.987-1.042) | 1.079 (1.042-1.117) * | 1.019 (0.997-1.042) |
| lag04 | 1.021 (0.998-1.045) | 1.013 (0.995-1.032) | 1.015 (0.984-1.046) | 1.078 (1.037-1.120) * | 1.018 (0.994-1.042) |
| lag05 | 1.020 (0.995-1.046) | 1.012 (0.992-1.033) | 1.015 (0.982-1.049) | 1.079 (1.035-1.124) * | 1.014 (0.988-1.041) |
| lag06 | 1.019 (0.993-1.046) | 1.012 (0.991-1.034) | 1.017 (0.982-1.052) | 1.085 (1.041-1.131) * | 1.008 (0.981-1.035) |
| lag07 | 1.019 (0.989-1.050) | 1.013 (0.989-1.038) | 1.019 (0.981-1.058) | 1.099 (1.051-1.148) * | 0.999 (0.969-1.030) |

**P*<0.05

#

# **Table S4.** RR and 95% CI for the effect of air pollution on ischemic stroke mortality in the female population

|  | PM2.5 | PM10 | SO2 | NO2 | CO |
| --- | --- | --- | --- | --- | --- |
| lag0 | 1.010 (0.986-1.035) | 1.004 (0.985-1.024) | 0.995 (0.961-1.030) | 0.993 (0.950-1.037) | 1.006 (0.978-1.034) |
| lag1 | 1.008 (0.994-1.022) | 1.003 (0.992-1.015) | 1.006 (0.985-1.026) | 1.006 (0.982-1.032) | 1.006 (0.990-1.021) |
| lag2 | 1.005 (0.993-1.017) | 1.002 (0.993-1.012) | 1.015 (0.998-1.032) | 1.017 (0.996-1.039) | 1.005 (0.992-1.018) |
| lag3 | 1.001 (0.987-1.016) | 1.001 (0.989-1.013) | 1.022 (1.001-1.043) * | 1.022 (0.995-1.049) | 1.002 (0.986-1.019) |
| lag4 | 0.997 (0.982-1.012) | 0.999 (0.987-1.011) | 1.025 (1.004-1.046) * | 1.017 (0.991-1.044) | 0.998 (0.982-1.015) |
| lag5 | 0.991 (0.980-1.003) | 0.997 (0.987-1.006) | 1.024 (1.007-1.041) * | 1.003 (0.983-1.023) | 0.992 (0.979-1.005) |
| lag6 | 0.985 (0.971-0.999) * | 0.994 (0.982-1.005) | 1.020 (1.001-1.040) * | 0.983 (0.960-1.007) | 0.984 (0.969-1.000) |
| lag7 | 0.978 (0.955-1.002) | 0.990 (0.971-1.010) | 1.015 (0.982-1.049) | 0.961 (0.921-1.002) | 0.976 (0.950-1.003) |
| lag01 | 1.018 (0.981-1.057) | 1.007 (0.977-1.038) | 1.001 (0.948-1.056) | 0.999 (0.934-1.068) | 1.012 (0.970-1.055) |
| lag02 | 1.023 (0.980-1.068) | 1.010 (0.975-1.046) | 1.016 (0.955-1.080) | 1.016 (0.942-1.097) | 1.016 (0.969-1.066) |
| lag03 | 1.025 (0.979-1.073) | 1.011 (0.972-1.051) | 1.038 (0.970-1.110) | 1.038 (0.957-1.127) | 1.019 (0.968-1.072) |
| lag04 | 1.022 (0.971-1.075) | 1.010 (0.967-1.055) | 1.064 (0.988-1.146) | 1.056 (0.966-1.154) | 1.017 (0.962-1.075) |
| lag05 | 1.013 (0.958-1.071) | 1.006 (0.959-1.055) | 1.089 (1.005-1.181) * | 1.059 (0.963-1.165) | 1.009 (0.950-1.071) |
| la06 | 0.997 (0.940-1.058) | 1.000 (0.950-1.052) | 1.111 (1.021-1.210) * | 1.041 (0.946-1.146) | 0.993 (0.932-1.058) |
| lag07 | 0.976 (0.914-1.043) | 0.990 (0.935-1.048) | 1.128 (1.027-1.238) * | 1.000 (0.904-1.108) | 0.969 (0.904-1.040) |

**P*<0.05

# **Table S5.** RR and 95% CI of the effect of air pollution on ischemic stroke incidence in the male population

|  | PM2.5 | PM10 | SO2 | NO2 | CO |
| --- | --- | --- | --- | --- | --- |
| lag0 | 1.005 (0.995-1.016) | 1.003 (0.995-1.011) | 1.001 (0.988-1.015) | 1.037 (1.019-1.055) * | 1.007 (0.996-1.019) |
| lag1 | 1.003 (0.997-1.009) | 1.001 (0.996-1.006) | 0.999 (0.991-1.006) | 1.020 (1.010-1.030) * | 1.003 (0.997-1.010) |
| lag2 | 1.001 (0.996-1.006) | 0.999 (0.996-1.003) | 0.997 (0.990-1.003) | 1.005 (0.997-1.014) | 1.000 (0.995-1.005) |
| lag3 | 1.000 (0.993-1.006) | 0.998 (0.994-1.003) | 0.996 (0.988-1.004) | 0.996 (0.985-1.006) | 0.997 (0.991-1.004) |
| lag4 | 0.998 (0.992-1.004) | 0.998 (0.993-1.002) | 0.997 (0.989-1.005) | 0.993 (0.982-1.004) | 0.996 (0.989-1.002) |
| lag5 | 0.998 (0.993-1.002) | 0.998 (0.994-1.002) | 0.999 (0.993-1.005) | 0.997 (0.989-1.005) | 0.995 (0.990-1.000) |
| lag6 | 0.997 (0.991-1.003) | 0.998 (0.994-1.003) | 1.003 (0.996-1.010) | 1.006 (0.997-1.016) | 0.995 (0.989-1.001) |
| lag7 | 0.997 (0.987-1.007) | 0.999 (0.992-1.007) | 1.007 (0.994-1.020) | 1.018 (1.000-1.035) * | 0.995 (0.984-1.006) |
| lag01 | 1.008 (0.993-1.025) | 1.004 (0.992-1.016) | 1.000 (0.980-1.021) | 1.057 (1.029-1.086) * | 1.011 (0.994-1.028) |
| lag02 | 1.010 (0.991-1.028) | 1.003 (0.989-1.017) | 0.996 (0.973-1.020) | 1.063 (1.031-1.096) * | 1.011 (0.991-1.030) |
| lag03 | 1.009 (0.990-1.029) | 1.001 (0.986-1.017) | 0.992 (0.967-1.018) | 1.058 (1.024-1.094) * | 1.008 (0.987-1.029) |
| lag04 | 1.008 (0.986-1.030) | 0.999 (0.982-1.017) | 0.989 (0.961-1.018) | 1.051 (1.014-1.090) * | 1.003 (0.981-1.026) |
| lag05 | 1.005 (0.982-1.029) | 0.997 (0.978-1.016) | 0.988 (0.957-1.019) | 1.048 (1.008-1.089) * | 0.998 (0.974-1.023) |
| lag06 | 1.002 (0.977-1.027) | 0.995 (0.975-1.016) | 0.991 (0.959-1.024) | 1.055 (1.014-1.097) * | 0.993 (0.968-1.019) |
| lag07 | 0.999 (0.971-1.027) | 0.994 (0.972-1.017) | 0.998 (0.963-1.034) | 1.073 (1.029-1.119) * | 0.988 (0.960-1.016) |

**P*<0.05

#

# **Table S6.** RR and 95% CI for the effect of air pollution on ischemic stroke mortality in the male population

|  | PM2.5 | PM10 | SO2 | NO2 | CO |
| --- | --- | --- | --- | --- | --- |
| lag0 | 1.031 (1.009-1.054) * | 1.016 (0.999-1.032) | 0.981 (0.950-1.012) | 1.016 (0.977-1.057) | 1.027 (1.002-1.053) * |
| lag1 | 1.014 (1.002-1.027) * | 1.006 (0.997-1.016) | 0.997 (0.979-1.015) | 1.008 (0.986-1.031) | 1.008 (0.994-1.022) |
| lag2 | 0.999 (0.989-1.010) | 0.998 (0.990-1.007) | 1.011 (0.996-1.026) | 1.002 (0.983-1.020) | 0.991 (0.980-1.003) |
| lag3 | 0.989 (0.976-1.002) | 0.993 (0.982-1.003) | 1.020 (1.001-1.040) * | 0.996 (0.973-1.020) | 0.981 (0.966-0.996) * |
| lag4 | 0.986 (0.973-0.999) * | 0.990 (0.980-1.000) | 1.023 (1.003-1.042) * | 0.994 (0.970-1.018) | 0.978 (0.964-0.993) * |
| lag5 | 0.989 (0.979-0.999) * | 0.991 (0.982-0.999) * | 1.018 (1.003-1.033) * | 0.994 (0.976-1.012) | 0.984 (0.972-0.995) * |
| lag6 | 0.997 (0.984-1.009) | 0.994 (0.984-1.004) | 1.008 (0.991-1.026) | 0.995 (0.974-1.016) | 0.995 (0.981-1.009) |
| lag7 | 1.007 (0.985-1.028) | 0.998 (0.981-1.015) | 0.997 (0.967-1.028) | 0.997 (0.961-1.036) | 1.009 (0.984-1.034) |
| lag01 | 1.046 (1.012-1.081) * | 1.022 (0.996-1.048) | 0.978 (0.931-1.027) | 1.025 (0.965-1.088) | 1.035 (0.997-1.075) |
| lag02 | 1.045 (1.006-1.085) * | 1.020 (0.990-1.051) | 0.988 (0.934-1.046) | 1.027 (0.959-1.099) | 1.026 (0.983-1.071) |
| lag03 | 1.033 (0.992-1.077) | 1.013 (0.979-1.047) | 1.008 (0.948-1.072) | 1.023 (0.950-1.101) | 1.006 (0.961-1.054) |
| lag04 | 1.018 (0.973-1.066) | 1.003 (0.965-1.042) | 1.031 (0.963-1.104) | 1.016 (0.938-1.101) | 0.984 (0.936-1.036) |
| lag05 | 1.007 (0.958-1.059) | 0.994 (0.953-1.036) | 1.050 (0.975-1.130) | 1.010 (0.927-1.100) | 0.968 (0.916-1.024) |
| lag06 | 1.003 (0.952-1.058) | 0.988 (0.944-1.033) | 1.058 (0.979-1.144) | 1.005 (0.921-1.096) | 0.963 (0.909-1.021) |
| lag07 | 1.010 (0.952-1.072) | 0.986 (0.937-1.036) | 1.055 (0.969-1.149) | 1.002 (0.914-1.099) | 0.972 (0.911-1.036) |

**P*<0.05

# **Table S7.** RR and 95% CI for the effect of air pollution on ischemic stroke incidence in people ≤75 years old

|  | PM2.5 | PM10 | SO2 | NO2 | CO |
| --- | --- | --- | --- | --- | --- |
| lag0 | 1.008 (0.998-1.018) | 1.004 (0.997-1.012) | 1.001 (0.988-1.013) | 1.041 (1.023-1.059) * | 1.009 (0.998-1.020) |
| lag1 | 1.005 (0.999-1.010) | 1.002 (0.998-1.006) | 0.998 (0.990-1.005) | 1.023 (1.013-1.033) * | 1.005 (0.999-1.011) |
| lag2 | 1.001 (0.997-1.006) | 1.000 (0.996-1.004) | 0.996 (0.990-1.002) | 1.007 (0.999-1.016) | 1.001 (0.996-1.006) |
| lag3 | 0.999 (0.993-1.005) | 0.998 (0.994-1.003) | 0.995 (0.987-1.003) | 0.997 (0.987-1.007) | 0.998 (0.992-1.004) |
| lag4 | 0.998 (0.992-1.004) | 0.998 (0.993-1.002) | 0.996 (0.988-1.003) | 0.993 (0.983-1.004) | 0.996 (0.990-1.002) |
| lag5 | 0.998 (0.993-1.002) | 0.998 (0.995-1.002) | 0.998 (0.992-1.004) | 0.997 (0.989-1.004) | 0.995 (0.990-1.000) |
| lag6 | 0.999 (0.993-1.004) | 0.999 (0.995-1.004) | 1.002 (0.995-1.009) | 1.005 (0.995-1.014) | 0.995 (0.989-1.001) |
| lag7 | 1.000 (0.990-1.010) | 1.001 (0.993-1.008) | 1.006 (0.993-1.018) | 1.015 (0.998-1.032) | 0.995 (0.984-1.006) |
| lag01 | 1.013 (0.997-1.029) | 1.006 (0.995-1.018) | 0.999 (0.979-1.019) | 1.065 (1.037-1.093) * | 1.014 (0.998-1.031) |
| lag02 | 1.014 (0.996-1.032) | 1.006 (0.993-1.020) | 0.994 (0.972-1.018) | 1.073 (1.041-1.105) * | 1.015 (0.997-1.035) |
| lag03 | 1.013 (0.994-1.033) | 1.005 (0.990-1.020) | 0.989 (0.965-1.015) | 1.070 (1.036-1.104) * | 1.013 (0.993-1.034) |
| lag04 | 1.011 (0.990-1.032) | 1.002 (0.986-1.019) | 0.985 (0.958-1.013) | 1.062 (1.026-1.100) * | 1.009 (0.987-1.032) |
| lag05 | 1.008 (0.986-1.032) | 1.001 (0.982-1.019) | 0.983 (0.954-1.013) | 1.059 (1.020-1.099) * | 1.004 (0.981-1.028) |
| lag06 | 1.007 (0.983-1.032) | 1.000 (0.980-1.020) | 0.985 (0.954-1.017) | 1.064 (1.024-1.105) * | 0.999 (0.975-1.024) |
| lag07 | 1.007 (0.980-1.035) | 1.001 (0.979-1.023) | 0.991 (0.957-1.025) | 1.079 (1.037-1.124) * | 0.994 (0.967-1.022) |

**P*<0.05

# **Table S8.** RR and 95% CI for the effect of air pollution on the ischemic stroke mortality in people ≤75 years old

|  | PM2.5 | PM10 | SO2 | NO2 | CO |
| --- | --- | --- | --- | --- | --- |
| lag0 | 1.019 (0.993-1.046) | 1.010 (0.990-1.030) | 0.988 (0.952-1.025) | 1.013 (0.968-1.061) | 1.036 (1.006-1.066) * |
| lag1 | 1.005 (0.990-1.020) | 1.003 (0.991-1.015) | 1.001 (0.979-1.022) | 1.003 (0.977-1.030) | 1.012 (0.995-1.029) |
| lag2 | 0.993 (0.981-1.005) | 0.996 (0.986-1.007) | 1.012 (0.994-1.030) | 0.994 (0.972-1.016) | 0.992 (0.978-1.006) |
| lag3 | 0.985 (0.970-1.001) | 0.991 (0.979-1.004) | 1.018 (0.996-1.041) | 0.987 (0.960-1.016) | 0.979 (0.962-0.997) * |
| lag4 | 0.983 (0.968-0.999) * | 0.989 (0.977-1.002) | 1.018 (0.996-1.041) | 0.985 (0.957-1.013) | 0.976 (0.959-0.993) * |
| lag5 | 0.987 (0.975-1.000) | 0.990 (0.979-1.000) | 1.012 (0.995-1.030) | 0.985 (0.965-1.007) | 0.982 (0.969-0.995) * |
| lag6 | 0.996 (0.981-1.011) | 0.992 (0.980-1.004) | 1.002 (0.981-1.023) | 0.989 (0.965-1.013) | 0.995 (0.979-1.011) |
| lag7 | 1.006 (0.981-1.033) | 0.995 (0.974-1.015) | 0.989 (0.954-1.026) | 0.993 (0.950-1.038) | 1.011 (0.982-1.041) |
| lag01 | 1.025 (0.985-1.066) | 1.013 (0.982-1.045) | 0.988 (0.933-1.047) | 1.016 (0.947-1.091) | 1.048 (1.002-1.096) * |
| lag02 | 1.017 (0.972-1.064) | 1.009 (0.973-1.046) | 1.000 (0.936-1.068) | 1.010 (0.932-1.095) | 1.040 (0.988-1.094) |
| lag03 | 1.002 (0.954-1.053) | 1.001 (0.961-1.042) | 1.018 (0.947-1.094) | 0.998 (0.915-1.087) | 1.018 (0.964-1.075) |
| lag04 | 0.985 (0.933-1.041) | 0.990 (0.946-1.036) | 1.037 (0.957-1.122) | 0.982 (0.894-1.079) | 0.993 (0.935-1.054) |
| lag05 | 0.973 (0.916-1.033) | 0.979 (0.931-1.030) | 1.049 (0.962-1.144) | 0.968 (0.875-1.071) | 0.975 (0.913-1.041) |
| lag06 | 0.969 (0.909-1.032) | 0.971 (0.920-1.025) | 1.051 (0.960-1.151) | 0.957 (0.864-1.060) | 0.970 (0.906-1.039) |
| lag07 | 0.975 (0.909-1.046) | 0.966 (0.910-1.025) | 1.040 (0.941-1.149) | 0.950 (0.853-1.059) | 0.981 (0.910-1.059) |

**P*<0.05

# **Table S9.** RR and 95% CI for the effect of air pollution on ischemic stroke incidence in people >75 years old

|  | PM2.5 | PM10 | SO2 | NO2 | CO |
| --- | --- | --- | --- | --- | --- |
| lag0 | 1.005 (0.994-1.017) | 1.004 (0.995-1.013) | 1.011 (0.995-1.026) | 1.029 (1.008-1.051) * | 1.004 (0.991-1.017) |
| lag1 | 1.005 (0.998-1.012) | 1.003 (0.998-1.009) | 1.009 (1.000-1.018) | 1.019 (1.007-1.030) * | 1.003 (0.996-1.011) |
| lag2 | 1.004 (0.999-1.010) | 1.002 (0.998-1.007) | 1.007 (1.000-1.015) | 1.009 (1.000-1.019) | 1.003 (0.997-1.009) |
| lag3 | 1.003 (0.996-1.010) | 1.001 (0.996-1.007) | 1.006 (0.996-1.015) | 1.003 (0.991-1.016) | 1.001 (0.994-1.009) |
| lag4 | 1.001 (0.995-1.008) | 1.000 (0.995-1.006) | 1.005 (0.995-1.014) | 1.001 (0.989-1.014) | 0.999 (0.992-1.007) |
| lag5 | 0.999 (0.994-1.005) | 0.999 (0.995-1.004) | 1.004 (0.997-1.011) | 1.004 (0.995-1.014) | 0.996 (0.991-1.002) |
| lag6 | 0.996 (0.990-1.003) | 0.998 (0.993-1.004) | 1.004 (0.995-1.012) | 1.010 (0.999-1.021) | 0.993 (0.986-1.000) |
| lag7 | 0.993 (0.982-1.005) | 0.997 (0.988-1.006) | 1.003 (0.989-1.018) | 1.017 (0.997-1.037) | 0.989 (0.977-1.002) |
| lag01 | 1.011 (0.992-1.029) | 1.008 (0.994-1.022) | 1.020 (0.996-1.044) | 1.048 (1.016-1.082) * | 1.007 (0.988-1.027) |
| lag02 | 1.015 (0.994-1.036) | 1.010 (0.994-1.027) | 1.027 (0.999-1.056) | 1.058 (1.021-1.096) * | 1.010 (0.988-1.033) |
| lag03 | 1.018 (0.996-1.041) | 1.011 (0.993-1.030) | 1.033 (1.002-1.064) * | 1.062 (1.022-1.103) * | 1.012 (0.988-1.036) |
| lag04 | 1.020 (0.995-1.045) | 1.012 (0.992-1.032) | 1.038 (1.004-1.073) * | 1.063 (1.020-1.108) * | 1.011 (0.985-1.038) |
| lag05 | 1.019 (0.992-1.047) | 1.011 (0.989-1.033) | 1.042 (1.005-1.080) * | 1.067 (1.021-1.116) * | 1.007 (0.979-1.036) |
| lag06 | 1.015 (0.987-1.045) | 1.009 (0.986-1.033) | 1.046 (1.007-1.086) * | 1.078 (1.030-1.128) * | 1.000 (0.971-1.030) |
| lag07 | 1.009 (0.977-1.041) | 1.006 (0.980-1.033) | 1.049 (1.007-1.094) * | 1.096 (1.045-1.150) * | 0.990 (0.958-1.023) |

**P*<0.05

# **Table S10.** RR and 95% CI for the effect of air pollution on ischemic stroke mortality in people >75 years old

|  | PM2.5 | PM10 | SO2 | NO2 | CO |
| --- | --- | --- | --- | --- | --- |
| lag0 | 1.025 (1.003-1.046) * | 1.011 (0.995-1.028) | 0.986 (0.956-1.016) | 1.001 (0.963-1.040) | 1.006 (0.982-1.031) |
| lag1 | 1.016 (1.004-1.028) * | 1.007 (0.997-1.017) | 1.000 (0.983-1.018) | 1.011 (0.989-1.033) | 1.004 (0.990-1.017) |
| lag2 | 1.008 (0.998-1.018) | 1.003 (0.994-1.011) | 1.014 (0.999-1.029) | 1.018 (1.000-1.037) * | 1.001 (0.990-1.012) |
| lag3 | 1.001 (0.988-1.013) | 0.999 (0.989-1.010) | 1.023 (1.005-1.042) * | 1.021 (0.998-1.045) | 0.998 (0.984-1.012) |
| lag4 | 0.995 (0.983-1.008) | 0.997 (0.987-1.007) | 1.028 (1.009-1.046) * | 1.017 (0.994-1.041) | 0.995 (0.980-1.009) |
| lag5 | 0.992 (0.982-1.002) | 0.996 (0.988-1.004) | 1.026 (1.012-1.041) * | 1.006 (0.989-1.024) | 0.991 (0.980-1.002) |
| lag6 | 0.989 (0.977-1.001) | 0.995 (0.985-1.005) | 1.021 (1.004-1.039) * | 0.991 (0.971-1.011) | 0.987 (0.974-1.000) |
| lag7 | 0.987 (0.966-1.008) | 0.995 (0.978-1.012) | 1.015 (0.985-1.045) | 0.973 (0.938-1.010) | 0.983 (0.960-1.007) |
| lag01 | 1.041 (1.008-1.075) * | 1.018 (0.993-1.045) | 0.986 (0.941-1.034) | 1.012 (0.954-1.073) | 1.010 (0.973-1.048) |
| lag02 | 1.049 (1.011-1.088) * | 1.021 (0.991-1.052) | 0.999 (0.946-1.055) | 1.031 (0.964-1.102) | 1.011 (0.969-1.054) |
| lag03 | 1.049 (1.009-1.092) * | 1.021 (0.987-1.055) | 1.023 (0.964-1.085) | 1.053 (0.980-1.131) | 1.009 (0.965-1.055) |
| lag04 | 1.045 (1.000-1.091) | 1.018 (0.980-1.057) | 1.051 (0.984-1.122) | 1.071 (0.990-1.158) | 1.003 (0.956-1.054) |
| lag05 | 1.036 (0.987-1.087) | 1.014 (0.973-1.056) | 1.078 (1.004-1.158) * | 1.078 (0.991-1.171) | 0.994 (0.943-1.049) |
| lag06 | 1.024 (0.973-1.078) | 1.009 (0.965-1.054) | 1.102 (1.022-1.187) * | 1.068 (0.981-1.161) | 0.982 (0.929-1.038) |
| lag07 | 1.011 (0.955-1.070) | 1.004 (0.956-1.055) | 1.118 (1.029-1.213) * | 1.039 (0.950-1.136) | 0.965 (0.907-1.026) |

**P*<0.05

# **Table S11.** RR (%) and 95% CI for the effect of air pollution on ischemic stroke incidence in cold seasons

|  | PM2.5 | PM10 | SO2 | NO2 | CO |
| --- | --- | --- | --- | --- | --- |
| lag0 | 1.010(1.000-1.021) | 1.005(0.996-1.015) | 0.998(0.982-1.014) | 1.029(1.009-1.049)* | 1.011(0.999-1.023) |
| lag1 | 1.007(1.001-1.013)* | 1.004(0.999-1.010) | 0.998(0.989-1.008) | 1.014(1.002-1.025)* | 1.008(1.000-1.015)* |
| lag2 | 1.004(0.999-1.009) | 1.004(0.999-1.009) | 0.999(0.991-1.006) | 1.000(0.991-1.010) | 1.005(0.999-1.010) |
| lag3 | 1.002(0.996-1.008) | 1.003(0.997-1.009) | 0.999(0.989-1.008) | 0.991(0.979-1.003) | 1.002(0.995-1.009) |
| lag4 | 1.001(0.994-1.007) | 1.002(0.997-1.008) | 0.999(0.989-1.008) | 0.986(0.975-0.998) | 1.000(0.993-1.007) |
| lag5 | 1.000(0.995-1.005) | 1.001(0.997-1.006) | 0.998(0.991-1.006) | 0.987(0.978-0.996) | 0.998(0.993-1.004) |
| lag6 | 1.000(0.994-1.006) | 1.001(0.995-1.006) | 0.998(0.989-1.007) | 0.991(0.980-1.001) | 0.997(0.990-1.005) |
| lag7 | 1.000(0.990-1.011) | 1.000(0.991-1.009) | 0.997(0.982-1.012) | 0.996(0.978-1.015) | 0.997(0.985-1.009) |
| lag01 | 1.017(1.000-1.034)* | 1.010(0.995-1.025) | 0.996(0.971-1.021) | 1.043(1.012-1.075)* | 1.019(0.999-1.038) |
| lag02 | 1.021(1.002-1.041)* | 1.013(0.995-1.032) | 0.994(0.966-1.024) | 1.043(1.007-1.080)* | 1.023(1.001-1.046)* |
| lag03 | 1.023(1.002-1.045)* | 1.016(0.996-1.037) | 0.993(0.962-1.025) | 1.033(0.995-1.074) | 1.025(1.001-1.050)* |
| lag04 | 1.024(1.000-1.048)* | 1.019(0.996-1.042) | 0.992(0.957-1.028) | 1.019(0.977-1.063) | 1.025(0.998-1.052) |
| lag05 | 1.024(0.997-1.051) | 1.020(0.994-1.046) | 0.990(0.951-1.030) | 1.006(0.960-1.053) | 1.023(0.994-1.054) |
| lag06 | 1.024(0.995-1.054) | 1.021(0.992-1.050) | 0.988(0.946-1.031) | 0.996(0.950-1.045) | 1.021(0.989-1.054) |
| lag07 | 1.024(0.991-1.059) | 1.021(0.989-1.054) | 0.985(0.939-1.033) | 0.992(0.942-1.045) | 1.017(0.981-1.055) |

**P*<0.05

# **Table S12.** RR (%) and 95% CI for the effect of air pollution on ischemic stroke mortality in cold seasons

|  | PM2.5 | PM10 | SO2 | NO2 | CO |
| --- | --- | --- | --- | --- | --- |
| lag0 | 1.015(0.991-1.040) | 1.006(0.984-1.029) | 0.980(0.943-1.019) | 1.015(0.970-1.062) | 1.024(0.995-1.054) |
| lag1 | 1.007(0.993-1.022) | 1.005(0.991-1.019) | 1.001(0.978-1.024) | 1.016(0.989-1.043) | 1.010(0.993-1.026) |
| lag2 | 1.000(0.989-1.012) | 1.003(0.992-1.015) | 1.018(0.999-1.037) | 1.015(0.993-1.038) | 0.997(0.983-1.010) |
| lag3 | 0.994(0.980-1.009) | 1.001(0.988-1.015) | 1.030(1.006-1.054)* | 1.012(0.984-1.040) | 0.988(0.971-1.005) |
| lag4 | 0.990(0.976-1.005) | 0.998(0.985-1.011) | 1.032(1.008-1.056)* | 1.004(0.977-1.032) | 0.984(0.968-1.001) |
| lag5 | 0.988(0.977-1.000) | 0.994(0.983-1.006) | 1.024(1.006-1.043)* | 0.993(0.972-1.014) | 0.986(0.973-1.000) |
| lag6 | 0.987(0.973-1.001) | 0.990(0.976-1.004) | 1.010(0.989-1.032) | 0.979(0.955-1.004) | 0.991(0.975-1.008) |
| lag7 | 0.987(0.964-1.011) | 0.985(0.963-1.007) | 0.993(0.957-1.031) | 0.964(0.923-1.007) | 0.999(0.971-1.028) |
| lag01 | 1.023(0.985-1.062) | 1.012(0.976-1.048) | 0.981(0.924-1.041) | 1.031(0.961-1.106) | 1.034(0.989-1.081) |
| lag02 | 1.023(0.979-1.069) | 1.015(0.973-1.059) | 0.998(0.931-1.070) | 1.046(0.965-1.135) | 1.031(0.980-1.085) |
| lag03 | 1.017(0.970-1.067) | 1.016(0.968-1.067) | 1.028(0.952-1.110) | 1.059(0.969-1.157) | 1.018(0.964-1.076) |
| lag04 | 1.008(0.955-1.063) | 1.014(0.961-1.071) | 1.061(0.974-1.155) | 1.063(0.964-1.173) | 1.002(0.943-1.066) |
| lag05 | 0.996(0.939-1.056) | 1.009(0.949-1.072) | 1.086(0.989-1.193) | 1.055(0.949-1.174) | 0.988(0.924-1.058) |
| lag06 | 0.983(0.922-1.048) | 0.998(0.934-1.067) | 1.097(0.992-1.214) | 1.033(0.925-1.154) | 0.980(0.910-1.055) |
| lag07 | 0.970(0.901-1.044) | 0.983(0.911-1.060) | 1.090(0.973-1.221) | 0.996(0.884-1.123) | 0.979(0.900-1.065) |

**P*<0.05

# **Table S13.** RR (%) and 95% CI for the effect of air pollution on ischemic stroke incidence in warm seasons

|  | PM2.5 | PM10 | SO2 | NO2 | CO |
| --- | --- | --- | --- | --- | --- |
| lag0 | 0.991(0.970-1.012) | 1.001(0.989-1.013) | 1.006(0.988-1.024) | 1.024(0.995-1.053) | 0.990(0.972-1.009) |
| lag1 | 0.992(0.980-1.005) | 0.999(0.992-1.006) | 1.000(0.988-1.011) | 1.013(0.995-1.030) | 0.991(0.980-1.003) |
| lag2 | 0.993(0.983-1.004) | 0.997(0.991-1.003) | 0.995(0.985-1.004) | 1.004(0.989-1.018) | 0.992(0.983-1.001) |
| lag3 | 0.995(0.982-1.007) | 0.996(0.989-1.004) | 0.992(0.981-1.003) | 0.999(0.982-1.016) | 0.993(0.982-1.004) |
| lag4 | 0.996(0.984-1.009) | 0.997(0.990-1.004) | 0.992(0.982-1.003) | 1.000(0.983-1.018) | 0.993(0.982-1.004) |
| lag5 | 0.998(0.988-1.008) | 0.998(0.993-1.004) | 0.996(0.987-1.006) | 1.007(0.993-1.022) | 0.993(0.984-1.002) |
| lag6 | 1.000(0.988-1.012) | 1.001(0.994-1.008) | 1.003(0.992-1.014) | 1.019(1.001-1.036)* | 0.992(0.982-1.003) |
| lag7 | 1.001(0.982-1.022) | 1.004(0.992-1.016) | 1.010(0.993-1.028) | 1.032(1.003-1.062) | 0.992(0.973-1.010) |
| lag01 | 0.983(0.951-1.016) | 1.000(0.982-1.019) | 1.006(0.988-1.024) | 1.037(0.992-1.083) | 0.982(0.953-1.011) |
| lag02 | 0.977(0.939-1.016) | 0.998(0.976-1.020) | 1.006(0.977-1.035) | 1.040(0.987-1.097) | 0.974(0.941-1.008) |
| lag03 | 0.971(0.930-1.015) | 0.994(0.970-1.019) | 1.000(0.966-1.035) | 1.039(0.979-1.103) | 0.967(0.932-1.004) |
| lag04 | 0.968(0.922-1.016) | 0.991(0.964-1.019) | 0.992(0.954-1.031) | 1.039(0.972-1.111) | 0.960(0.921-1.001) |
| lag05 | 0.966(0.915-1.019) | 0.989(0.960-1.020) | 0.984(0.942-1.028) | 1.047(0.971-1.128) | 0.953(0.911-0.997)* |
| lag06 | 0.965(0.911-1.023) | 0.990(0.958-1.024) | 0.981(0.934-1.030) | 1.066(0.982-1.157) | 0.946(0.901-0.993)* |
| lag07 | 0.967(0.906-1.031) | 0.994(0.958-1.032) | 0.983(0.933-1.037) | 1.100(1.003-1.207)* | 0.938(0.888-0.990)* |

**P*<0.05

# **Table S14.** RR (%) and 95% CI for the effect of air pollution on ischemic stroke mortality in warm seasons

|  | PM2.5 | PM10 | SO2 | NO2 | CO |
| --- | --- | --- | --- | --- | --- |
| lag0 | 1.051(1.009-1.095)* | 1.026(1.003-1.048)* | 1.003(0.963-1.044) | 0.993(0.936-1.053) | 1.001(0.962-1.041) |
| lag1 | 1.029(1.004-1.056)* | 1.015(1.001-1.029)* | 1.004(0.979-1.029) | 0.999(0.963-1.036) | 1.003(0.980-1.027) |
| lag2 | 1.011(0.99-1.0320) | 1.006(0.994-1.017) | 1.005(0.984-1.026) | 1.005(0.974-1.036) | 1.004(0.985-1.024) |
| lag3 | 0.997(0.973-1.023) | 0.999(0.986-1.013) | 1.006(0.982-1.031) | 1.009(0.973-1.046) | 1.003(0.980-1.026) |
| lag4 | 0.991(0.967-1.016) | 0.996(0.983-1.010) | 1.007(0.983-1.031) | 1.011(0.975-1.049) | 0.997(0.974-1.020) |
| lag5 | 0.993(0.973-1.013) | 0.997(0.986-1.008) | 1.008(0.988-1.028) | 1.012(0.981-1.044) | 0.988(0.969-1.006) |
| lag6 | 0.999(0.975-1.023) | 1.000(0.986-1.014) | 1.008(0.984-1.033) | 1.011(0.974-1.049) | 0.976(0.954-0.998) |
| lag7 | 1.007(0.968-1.048) | 1.005(0.982-1.028) | 1.009(0.970-1.048) | 1.010(0.952-1.072) | 0.963(0.926-1.001) |
| lag01 | 1.082(1.014-1.154)* | 1.041(1.005-1.078)* | 1.006(0.944-1.073) | 0.992(0.903-1.089) | 1.004(0.944-1.068) |
| lag02 | 1.093(1.012-1.181)* | 1.047(1.005-1.091)* | 1.012(0.937-1.092) | 0.996(0.891-1.114) | 1.008(0.939-1.083) |
| lag03 | 1.090(1.000-1.189)* | 1.046(0.999-1.096) | 1.018(0.934-1.109) | 1.005(0.887-1.140) | 1.011(0.935-1.093) |
| lag04 | 1.081(0.981-1.191) | 1.043(0.989-1.099) | 1.025(0.930-1.129) | 1.017(0.882-1.172) | 1.008(0.925-1.099) |
| lag05 | 1.073(0.964-1.195) | 1.039(0.980-1.102) | 1.033(0.928-1.150) | 1.029(0.878-1.206) | 0.996(0.906-1.095) |
| lag06 | 1.072(0.954-1.204) | 1.040(0.975-1.109) | 1.041(0.927-1.170) | 1.040(0.874-1.238) | 0.972(0.877-1.076) |
| lag07 | 1.079(0.948-1.229) | 1.044(0.970-1.124) | 1.050(0.921-1.197) | 1.050(0.862-1.279) | 0.935(0.833-1.050) |

**P*<0.05
